# Supplementary material for: Dredging in the Spratly Islands: Gaining Land but Losing Reefs
Source: PLoS Biol. 2016 Mar 31;14(3):e1002422. doi: 10.1371/journal.pbio.1002422 (PMC4816285; doi:10.1371/journal.pbio.1002422)
Supplement: S2 Data — (XLSX) [file pbio.1002422.s002.xlsx]

## Sheet: Read me
S2 Data: Raw and interpolated data from Landsat 8 imagery (as shown in Fig. 1C).
Tab	Column header	Description of column
RawAtollData	Atoll Name	Name of the reclaimed atoll in the Spratly Islands for which data was collected. One of seven atolls (Fiery Cross, Subi, Cuarteron, Mischief, Hughes, Johnson, Gaven).
	Landsat Scene Identifier	Identifier of the Landsat 8 GeoTIFFs used for measuring land and total atoll areas.
	Land Area (m^2)	Extent of area with land above water in square meters, as measured using the visible area in Landsat 8 band 6 image (see S1 Data for methods description).
	Total Atoll Area (m^2)	Extent of area with land, submerged reefs, and submerged natural sand bars in square meters, as measured using the visible area in Landsat 8 band 4 image (see S1 Data for methods description).
	Reef Area (m^2)	Extent of submerged reef area in square meters, as calculated by subtracting the land area from the total reef area.
	Image Acquisition Date	Date associated with Landsat 8 images. It should be noted that raw data for some atolls were collected for images before February 2014 and after May 2015 (the dates shown in Figure 1 of the paper). However, for consistency we calculated aggregated changes in land and reef area using only the data associated with dates spanning the time with available images for all atolls (February 5, 2014 to May…
InterpolatedLandArea	Interpolated Dates	All dates (Year-Month-Day) between the earliest cloud-free Landsat 8 images available for any of the seven recently reclaimed atolls in the Spratly Islands (2013-04-30) and the date for the most recent available image for any of the seven atolls (2015-08-01)
	Cuarteron Land Area (m^2)	Interpolated extent of area with land above water (in square meters) at Cuarteron Reef, as measured using the visible area in Landsat 8 band 6 image (see S1 Data for methods description).
	Fiery Cross Land Area (m^2)	Interpolated extent of area with land above water (in square meters) at Fiery Cross Reef, as measured using the visible area in Landsat 8 band 6 image (see S1 Data for methods description).
	Gaven Land Area (m^2)	Interpolated extent of area with land above water (in square meters) at Gaven Reef, as measured using the visible area in Landsat 8 band 6 image (see S1 Data for methods description).
	Hughes Land Area (m^2)	Interpolated extent of area with land above water (in square meters) at Hughes Reef, as measured using the visible area in Landsat 8 band 6 image (see S1 Data for methods description).
	Johnson Land Area (m^2)	Interpolated extent of area with land above water (in square meters) at Johnson South Reef, as measured using the visible area in Landsat 8 band 6 image (see S1 Data for methods description).
	Mischief Land Area (m^2)	Interpolated extent of area with land above water (in square meters) at Mischief Reef, as measured using the visible area in Landsat 8 band 6 image (see S1 Data for methods description).
	Subi Land Area (m^2)	Interpolated extent of area with land above water (in square meters) at Subi Reef, as measured using the visible area in Landsat 8 band 6 image (see S1 Data for methods description).
	Total Land Area (m^2)	Aggregated interpolated extent of area with land above water (in square meters) for all seven recently reclaimed atolls in the Spratly Islands, as measured using the visible area in Landsat 8 band 6 image (see S1 Data for methods description).
InterpolatedReefArea	Interpolated Dates	All dates (Year-Month-Day) between the earliest cloud-free Landsat 8 images available for any of the seven recently reclaimed atolls in the Spratly Islands (2013-04-30) and the date for the most recent available image for any of the seven atolls (2015-08-01)
	Cuarteron Reef Area (m^2)	Interpolated extent of submerged reef area (in square meters) at Cuarteron Reef over time, as calculated by subtracting the land area from the total reef area at this location.
	Fiery Cross Reef Area (m^2)	Interpolated extent of submerged reef area (in square meters) at Fiery Cross Reef over time, as calculated by subtracting the land area from the total reef area at this location.
	Gaven Reef Area (m^2)	Interpolated extent of submerged reef area (in square meters) at Gaven Reef over time, as calculated by subtracting the land area from the total reef area at this location.
	Hughes Reef Area (m^2)	Interpolated extent of submerged reef area (in square meters) at Hughes Reef over time, as calculated by subtracting the land area from the total reef area at this location.
	Johnson Reef Area (m^2)	Interpolated extent of submerged reef area (in square meters) at Johnson Reef over time, as calculated by subtracting the land area from the total reef area at this location.
	Mischief Reef Area (m^2)	Interpolated extent of submerged reef area (in square meters) at Mischief Reef over time, as calculated by subtracting the land area from the total reef area at this location.
	Subi Reef Area (m^2)	Interpolated extent of submerged reef area (in square meters) at Subi Reef over time, as calculated by subtracting the land area from the total reef area at this location.
	Total Reef Area (m^2)	Aggregated interpolated extent of submerged reef area (in square meters) for all seven recently reclaimed atolls in the Spratly Islands, as calculated by subtracting the land area from the total reef area for each atoll (see S1 Data for methods description).
AggregatedData	Interpolated Dates	All dates (Year-Month-Day) between the earliest and latest dates for which data was available for all seven of the recently reclaimed atolls in the Spratly Islands (2014-02-05 to 2015-05-06)
	Total Land Area (m^2)	Aggregated extent of area with land above water (in square meters) for all seven recently reclaimed atolls in the Spratly Islands, as measured using the visible area in Landsat 8 band 6 image (see S1 Data for methods description).
	Total Reef Area (m^2)	Aggregated extent of submerged reef area (in square meters) for all seven recently reclaimed atolls in the Spratly Islands, as calculated by subtracting the land area from the total reef area for each atoll (see S1 Data for methods description).
	Total Land Area (km^2)	Aggregated extent of area with land above water (in square kilometers) for all seven recently reclaimed atolls in the Spratly Islands, as measured using the visible area in Landsat 8 band 6 image (see S1 Data for methods description).
	Total Reef Area (km^2)	Aggregated extent of submerged reef area (in square kilometers) for all seven recently reclaimed atolls in the Spratly Islands, as calculated by subtracting the land area from the total reef area for each atoll (see S1 Data for methods description).

## Sheet: RawAtollData
Atoll Name	Landsat Scene Identifier	Land Area (m^2)	Total Atoll Area (m^2)	Reef Area (m^2)	Image Acquisition Date
Fiery Cross	LC81200542014034LGN00	19194.6	5.03722e+06	5.01802e+06	2014-02-05
Fiery Cross	LC81200542014098LGN00	19194.6	4.99048e+06	4.97129e+06	2014-04-08
Fiery Cross	LC81200542014114LGN00	19194.6	4.99048e+06	4.97129e+06	2014-04-24
Fiery Cross	LC81200542014226LGN00	19194.6	4.99048e+06	4.97129e+06	2014-08-15
Fiery Cross	LC81200542014338LGN00	1.74153e+06	4.2314e+06	2.48987e+06	2014-12-04
Fiery Cross	LC81200542015069LGN00	3.01776e+06	4.13333e+06	1.11557e+06	2015-03-10
Fiery Cross	LC81200542015085LGN00	3.00818e+06	4.22931e+06	1.22112e+06	2015-03-26
Fiery Cross	LC81200542015101LGN00	3.04145e+06	4.19088e+06	1.14943e+06	2015-04-11
Fiery Cross	LC81200542015117LGN00	3.03578e+06	4.0499e+06	1.01412e+06	2015-04-27
Fiery Cross	LC81200542015133LGN00	3.0931e+06	4.06479e+06	971689	2015-05-13
Fiery Cross	LC81200542015197LGN00	3.0931e+06	4.06479e+06	971689	2015-07-16
Subi	LC81200522013143LGN01	0	7.40574e+06	7.40574e+06	2013-05-23
Subi	LC81200522014066LGN00	0	7.43892e+06	7.43892e+06	2014-03-07
Subi	LC81200522014098LGN00	0	7.44682e+06	7.44682e+06	2014-04-08
Subi	LC81200522014130LGN00	13219.1	7.47498e+06	7.46176e+06	2014-05-10
Subi	LC81200522014146LGN00	12150	7.48039e+06	7.46824e+06	2014-05-26
Subi	LC81200522014226LGN00	19982.7	7.4028e+06	7.38282e+06	2014-08-14
Subi	LC81200522014274LGN00	18530.2	7.40951e+06	7.39098e+06	2014-10-01
Subi	LC81200522014338LGN00	16392.2	7.35523e+06	7.33884e+06	2014-12-04
Subi	LC81200522015037LGN00	174625	7.42517e+06	7.25054e+06	2015-02-06
Subi	LC81200522015053LGN00	691028	7.67068e+06	6.97965e+06	2015-02-22
Subi	LC81200522015069LGN00	1.20602e+06	7.43996e+06	6.23395e+06	2015-03-10
Subi	LC81200522015085LGN00	2.13338e+06	7.68216e+06	5.54878e+06	2015-03-26
Subi	LC81200522015117LGN00	2.84473e+06	7.68216e+06	4.83743e+06	2015-04-27
Subi	LC81200522015133LGN00	3.12168e+06	7.68216e+06	4.56048e+06	2015-05-13
Subi	LC81200522015149LGN00	4.27225e+06	7.68216e+06	3.40991e+06	2015-05-29
Subi	LC81200522015197LGN00	4.47918e+06	7.68216e+06	3.20298e+06	2015-07-16
Subi	LC81200522015213LGN00	4.48906e+06	7.68216e+06	3.1931e+06	2015-08-01
Cuarteron	LC81200542014034LGN00	0	6.02133e+06	6.02133e+06	2014-02-03
Cuarteron	LC81200542014098LGN00	0	5.96734e+06	5.96734e+06	2014-04-08
Cuarteron	LC81200542014114LGN00	42718.3	5.95635e+06	5.91363e+06	2014-04-24
Cuarteron	LC81200542014226LGN00	273120	5.92661e+06	5.65349e+06	2014-08-14
Cuarteron	LC81200542014338LGN00	309513	5.90436e+06	5.59484e+06	2014-12-04
Cuarteron	LC81200542015069LGN00	320869	5.8593e+06	5.53843e+06	2015-03-10
Cuarteron	LC81200542015085LGN00	323690	5.91463e+06	5.59094e+06	2015-03-26
Cuarteron	LC81200542015101LGN00	315348	5.91463e+06	5.59929e+06	2015-04-11
Cuarteron	LC81200542015117LGN00	315348	5.91463e+06	5.59929e+06	2015-04-27
Cuarteron	LC81200542015133LGN00	315348	5.91463e+06	5.59929e+06	2015-05-13
Cuarteron	LC81200542015149LGN00	315348	5.91463e+06	5.59929e+06	2015-05-29
Cuarteron	LC81200542015197LGN00	315348	5.91463e+06	5.59929e+06	2015-07-16
Mischief	LC81190532013120LGN01	0	1.3485e+07	1.3485e+07	2013-04-30
Mischief	LC81190532014059LGN00	0	1.3485e+07	1.3485e+07	2014-02-28
Mischief	LC81190532014091LGN00	0	1.3485e+07	1.3485e+07	2014-04-01
Mischief	LC81190532014123LGN00	9000	1.3485e+07	1.3476e+07	2014-05-03
Mischief	LC81190532014235LGN00	7925.4	1.3485e+07	1.3477e+07	2014-08-23
Mischief	LC81190532014267LGN00	8100	1.3485e+07	1.34769e+07	2014-09-24
Mischief	LC81190532014299LGN00	7945.93	1.32627e+07	1.32547e+07	2014-10-26
Mischief	LC81190532015030LGN00	7962.51	1.33356e+07	1.33276e+07	2015-01-30
Mischief	LC81190532015046LGN00	27627.7	1.31647e+07	1.31371e+07	2015-02-15
Mischief	LC81190532015078LGN00	1.26706e+06	1.35002e+07	1.22331e+07	2015-03-19
Mischief	LC81190532015094LGN00	2.09166e+06	1.35002e+07	1.14085e+07	2015-04-04
Mischief	LC81190532015110LGN00	3.3625e+06	1.35002e+07	1.01377e+07	2015-04-20
Mischief	LC81190532015126LGN00	3.90159e+06	1.35002e+07	9.59859e+06	2015-05-06
Mischief	LC81190532015142LGN00	4.31708e+06	1.35002e+07	9.18311e+06	2015-05-22
Mischief	LC81190532015158LGN00	6.19561e+06	1.35002e+07	7.30458e+06	2015-06-07
Mischief	LC81190532015206LGN00	6.46163e+06	1.35002e+07	7.03856e+06	2015-07-25
Hughes	LC81190532013120LGN01	5145.34	2.65353e+06	2.64838e+06	2013-04-30
Hughes	LC81190532014059LGN00	6749.57	2.65353e+06	2.64678e+06	2014-02-28
Hughes	LC81190532014091LGN00	34939.6	2.64193e+06	2.60699e+06	2014-04-01
Hughes	LC81190532014123LGN00	142208	2.65353e+06	2.51132e+06	2014-05-03
Hughes	LC81190532014267LGN00	138557	2.63606e+06	2.4975e+06	2014-09-24
Hughes	LC81190532015030LGN00	134221	2.61098e+06	2.47675e+06	2015-01-30
Hughes	LC81190532015046LGN00	138943	2.61115e+06	2.4722e+06	2015-02-15
Hughes	LC81190532015078LGN00	133752	2.59744e+06	2.46369e+06	2015-03-19
Hughes	LC81190532015094LGN00	140988	2.59744e+06	2.45645e+06	2015-04-04
Hughes	LC81190532015110LGN00	140988	2.59744e+06	2.45645e+06	2015-04-20
Hughes	LC81190532015126LGN00	140988	2.59744e+06	2.45645e+06	2015-05-06
Johnson	LC81200532013143LGN01	0	6.59384e+06	6.59384e+06	2013-05-23
Johnson	LC81200532014034LGN00	89140.7	6.59384e+06	6.5047e+06	2014-02-03
Johnson	LC81200532014050LGN00	103708	6.59384e+06	6.49013e+06	2014-02-19
Johnson	LC81200532014066LGN00	157503	6.59384e+06	6.43634e+06	2014-03-07
Johnson	LC81200532014098LGN00	154879	6.59384e+06	6.43896e+06	2014-04-08
Johnson	LC81200532014114LGN00	147245	6.58147e+06	6.43422e+06	2014-04-24
Johnson	LC81200532014130LGN00	150056	6.58159e+06	6.43153e+06	2014-05-10
Johnson	LC81200532014146LGN00	146748	6.57184e+06	6.42509e+06	2014-05-26
Johnson	LC81200532014226LGN00	174354	6.5766e+06	6.40224e+06	2014-08-14
Johnson	LC81200532014274LGN00	163146	6.59193e+06	6.42878e+06	2014-10-01
Johnson	LC81200532015037LGN00	156818	6.59733e+06	6.44051e+06	2015-02-06
Johnson	LC81200532015069LGN00	156818	6.58283e+06	6.42601e+06	2015-03-10
Johnson	LC81200532015085LGN00	157230	6.59384e+06	6.43661e+06	2015-03-26
Johnson	LC81200532015101LGN00	157230	6.59384e+06	6.43661e+06	2015-04-11
Johnson	LC81200532015117LGN00	157230	6.59384e+06	6.43661e+06	2015-04-27
Johnson	LC81200532015133LGN00	157230	6.59384e+06	6.43661e+06	2015-05-13
Gaven	LC81200532013143LGN01	22190.2	2.03082e+06	2.00863e+06	2013-05-23
Gaven	LC81200532014034LGN00	22190.2	2.03082e+06	2.00863e+06	2014-02-03
Gaven	LC81200532014050LGN00	22190.2	2.03082e+06	2.00863e+06	2014-02-19
Gaven	LC81200532014066LGN00	22190.2	2.03082e+06	2.00863e+06	2014-03-07
Gaven	LC81200532014098LGN00	22190.2	2.03082e+06	2.00863e+06	2014-04-08
Gaven	LC81200532014114LGN00	22190.2	2.03082e+06	2.00863e+06	2014-04-24
Gaven	LC81200532014130LGN00	22190.2	2.03082e+06	2.00863e+06	2014-05-10
Gaven	LC81200532014146LGN00	22190.2	2.03082e+06	2.00863e+06	2014-05-26
Gaven	LC81200532014226LGN00	212195	2.00305e+06	1.79086e+06	2014-08-14
Gaven	LC81200532014274LGN00	269150	1.99491e+06	1.72576e+06	2014-10-01
Gaven	LC81200532015037LGN00	244978	1.99491e+06	1.74993e+06	2015-02-06
Gaven	LC81200532015069LGN00	246751	1.99491e+06	1.74816e+06	2015-03-10
Gaven	LC81200532015085LGN00	249179	1.99491e+06	1.74573e+06	2015-03-26
Gaven	LC81200532015117LGN00	249179	1.99491e+06	1.74573e+06	2015-04-27
Gaven	LC81200532015133LGN00	254427	1.99491e+06	1.74049e+06	2015-05-13

## Sheet: InterpolatedLandArea
Interpolated Dates	Cuarteron Land Area (m^2)	Fiery Cross Land Area (m^2)	Gaven Land Area (m^2)	Hughes Land Area (m^2)	Johnson Land Area (m^2)	Mischief Land Area (m^2)	Subi Land Area (m^2)	Total Land Area (m^2)
2013-04-30				5145.34		0		NA
2013-05-01				5145.34		0		NA
2013-05-02				5145.36		0		NA
2013-05-03				5145.39		0		NA
2013-05-04				5145.42		0		NA
2013-05-05				5145.47		0		NA
2013-05-06				5145.53		0		NA
2013-05-07				5145.6		0		NA
2013-05-08				5145.68		0		NA
2013-05-09				5145.78		0		NA
2013-05-10				5145.88		0		NA
2013-05-11				5146		0		NA
2013-05-12				5146.13		0		NA
2013-05-13				5146.28		0		NA
2013-05-14				5146.43		0		NA
2013-05-15				5146.61		0		NA
2013-05-16				5146.79		0		NA
2013-05-17				5146.99		0		NA
2013-05-18				5147.2		0		NA
2013-05-19				5147.43		0		NA
2013-05-20				5147.67		0		NA
2013-05-21				5147.93		0		NA
2013-05-22				5148.2		0		NA
2013-05-23			22190.2	5148.49	0	0	0	NA
2013-05-24			22190.2	5148.79	1.81337	0	0	NA
2013-05-25			22190.2	5149.11	7.24636	0	0	NA
2013-05-26			22190.2	5149.45	16.2883	0	0	NA
2013-05-27			22190.2	5149.8	28.9286	0	0	NA
2013-05-28			22190.2	5150.17	45.1565	0	0	NA
2013-05-29			22190.2	5150.55	64.9613	0	0	NA
2013-05-30			22190.2	5150.95	88.3325	0	0	NA
2013-05-31			22190.2	5151.37	115.259	0	0	NA
2013-06-01			22190.2	5151.81	145.731	0	0	NA
2013-06-02			22190.2	5152.26	179.737	0	0	NA
2013-06-03			22190.2	5152.74	217.267	0	0	NA
2013-06-04			22190.2	5153.23	258.31	0	0	NA
2013-06-05			22190.2	5153.74	302.855	0	0	NA
2013-06-06			22190.2	5154.27	350.892	0	0	NA
2013-06-07			22190.2	5154.81	402.409	0	0	NA
2013-06-08			22190.2	5155.38	457.398	0	0	NA
2013-06-09			22190.2	5155.97	515.845	0	0	NA
2013-06-10			22190.2	5156.57	577.742	0	0	NA
2013-06-11			22190.2	5157.2	643.077	0	0	NA
2013-06-12			22190.2	5157.85	711.84	0	0	NA
2013-06-13			22190.2	5158.51	784.02	0	0	NA
2013-06-14			22190.2	5159.2	859.606	0	0	NA
2013-06-15			22190.2	5159.91	938.588	0	0	NA
2013-06-16			22190.2	5160.64	1020.96	0	0	NA
2013-06-17			22190.2	5161.39	1106.7	0	0	NA
2013-06-18			22190.2	5162.16	1195.8	0	0	NA
2013-06-19			22190.2	5162.96	1288.26	0	0	NA
2013-06-20			22190.2	5163.78	1384.06	0	0	NA
2013-06-21			22190.2	5164.62	1483.19	0	0	NA
2013-06-22			22190.2	5165.48	1585.65	0	0	NA
2013-06-23			22190.2	5166.37	1691.41	0	0	NA
2013-06-24			22190.2	5167.27	1800.47	0	0	NA
2013-06-25			22190.2	5168.21	1912.82	0	0	NA
2013-06-26			22190.2	5169.16	2028.46	0	0	NA
2013-06-27			22190.2	5170.14	2147.35	0	0	NA
2013-06-28			22190.2	5171.15	2269.51	0	0	NA
2013-06-29			22190.2	5172.17	2394.91	0	0	NA
2013-06-30			22190.2	5173.23	2523.55	0	0	NA
2013-07-01			22190.2	5174.31	2655.41	0	0	NA
2013-07-02			22190.2	5175.41	2790.49	0	0	NA
2013-07-03			22190.2	5176.54	2928.77	0	0	NA
2013-07-04			22190.2	5177.69	3070.25	0	0	NA
2013-07-05			22190.2	5178.87	3214.9	0	0	NA
2013-07-06			22190.2	5180.08	3362.73	0	0	NA
2013-07-07			22190.2	5181.31	3513.72	0	0	NA
2013-07-08			22190.2	5182.57	3667.86	0	0	NA
2013-07-09			22190.2	5183.85	3825.14	0	0	NA
2013-07-10			22190.2	5185.17	3985.55	0	0	NA
2013-07-11			22190.2	5186.51	4149.08	0	0	NA
2013-07-12			22190.2	5187.87	4315.71	0	0	NA
2013-07-13			22190.2	5189.27	4485.44	0	0	NA
2013-07-14			22190.2	5190.69	4658.26	0	0	NA
2013-07-15			22190.2	5192.15	4834.16	0	0	NA
2013-07-16			22190.2	5193.63	5013.12	0	0	NA
2013-07-17			22190.2	5195.14	5195.13	0	0	NA
2013-07-18			22190.2	5196.67	5380.19	0	0	NA
2013-07-19			22190.2	5198.24	5568.28	0	0	NA
2013-07-20			22190.2	5199.84	5759.39	0	0	NA
2013-07-21			22190.2	5201.47	5953.52	0	0	NA
2013-07-22			22190.2	5203.12	6150.64	0	0	NA
2013-07-23			22190.2	5204.81	6350.76	0	0	NA
2013-07-24			22190.2	5206.53	6553.86	0	0	NA
2013-07-25			22190.2	5208.28	6759.92	0	0	NA
2013-07-26			22190.2	5210.06	6968.95	0	0	NA
2013-07-27			22190.2	5211.87	7180.92	0	0	NA
2013-07-28			22190.2	5213.71	7395.83	0	0	NA
2013-07-29			22190.2	5215.58	7613.67	0	0	NA
2013-07-30			22190.2	5217.49	7834.42	0	0	NA
2013-07-31			22190.2	5219.43	8058.07	0	0	NA
2013-08-01			22190.2	5221.4	8284.63	0	0	NA
2013-08-02			22190.2	5223.4	8514.06	0	0	NA
2013-08-03			22190.2	5225.44	8746.37	0	0	NA
2013-08-04			22190.2	5227.5	8981.54	0	0	NA
2013-08-05			22190.2	5229.61	9219.56	0	0	NA
2013-08-06			22190.2	5231.74	9460.43	0	0	NA
2013-08-07			22190.2	5233.91	9704.12	0	0	NA
2013-08-08			22190.2	5236.12	9950.64	0	0	NA
2013-08-09			22190.2	5238.36	10200	0	0	NA
2013-08-10			22190.2	5240.63	10452.1	0	0	NA
2013-08-11			22190.2	5242.94	10707	0	0	NA
2013-08-12			22190.2	5245.28	10964.7	0	0	NA
2013-08-13			22190.2	5247.66	11225.1	0	0	NA
2013-08-14			22190.2	5250.08	11488.3	0	0	NA
2013-08-15			22190.2	5252.53	11754.3	0	0	NA
2013-08-16			22190.2	5255.01	12023	0	0	NA
2013-08-17			22190.2	5257.53	12294.4	0	0	NA
2013-08-18			22190.2	5260.09	12568.5	0	0	NA
2013-08-19			22190.2	5262.69	12845.4	0	0	NA
2013-08-20			22190.2	5265.32	13124.9	0	0	NA
2013-08-21			22190.2	5267.99	13407.1	0	0	NA
2013-08-22			22190.2	5270.7	13692	0	0	NA
2013-08-23			22190.2	5273.45	13979.5	0	0	NA
2013-08-24			22190.2	5276.23	14269.7	0	0	NA
2013-08-25			22190.2	5279.05	14562.5	0	0	NA
2013-08-26			22190.2	5281.91	14857.9	0	0	NA
2013-08-27			22190.2	5284.81	15156	0	0	NA
2013-08-28			22190.2	5287.75	15456.7	0	0	NA
2013-08-29			22190.2	5290.73	15760	0	0	NA
2013-08-30			22190.2	5293.75	16065.8	0	0	NA
2013-08-31			22190.2	5296.8	16374.2	0	0	NA
2013-09-01			22190.2	5299.9	16685.2	0	0	NA
2013-09-02			22190.2	5303.04	16998.8	0	0	NA
2013-09-03			22190.2	5306.22	17314.9	0	0	NA
2013-09-04			22190.2	5309.43	17633.5	0	0	NA
2013-09-05			22190.2	5312.69	17954.6	0	0	NA
2013-09-06			22190.2	5315.99	18278.3	0	0	NA
2013-09-07			22190.2	5319.34	18604.4	0	0	NA
2013-09-08			22190.2	5322.72	18933.1	0	0	NA
2013-09-09			22190.2	5326.15	19264.2	0	0	NA
2013-09-10			22190.2	5329.61	19597.8	0	0	NA
2013-09-11			22190.2	5333.12	19933.8	0	0	NA
2013-09-12			22190.2	5336.68	20272.3	0	0	NA
2013-09-13			22190.2	5340.27	20613.3	0	0	NA
2013-09-14			22190.2	5343.91	20956.6	0	0	NA
2013-09-15			22190.2	5347.59	21302.4	0	0	NA
2013-09-16			22190.2	5351.32	21650.5	0	0	NA
2013-09-17			22190.2	5355.09	22001.1	0	0	NA
2013-09-18			22190.2	5358.9	22354.1	0	0	NA
2013-09-19			22190.2	5362.76	22709.4	0	0	NA
2013-09-20			22190.2	5366.67	23067.1	0	0	NA
2013-09-21			22190.2	5370.61	23427.1	0	0	NA
2013-09-22			22190.2	5374.61	23789.5	0	0	NA
2013-09-23			22190.2	5378.65	24154.2	0	0	NA
2013-09-24			22190.2	5382.73	24521.2	0	0	NA
2013-09-25			22190.2	5386.86	24890.5	0	0	NA
2013-09-26			22190.2	5391.04	25262.1	0	0	NA
2013-09-27			22190.2	5395.26	25636.1	0	0	NA
2013-09-28			22190.2	5399.53	26012.3	0	0	NA
2013-09-29			22190.2	5403.84	26390.7	0	0	NA
2013-09-30			22190.2	5408.21	26771.4	0	0	NA
2013-10-01			22190.2	5412.62	27154.4	0	0	NA
2013-10-02			22190.2	5417.07	27539.6	0	0	NA
2013-10-03			22190.2	5421.58	27927	0	0	NA
2013-10-04			22190.2	5426.13	28316.6	0	0	NA
2013-10-05			22190.2	5430.73	28708.4	0	0	NA
2013-10-06			22190.2	5435.38	29102.4	0	0	NA
2013-10-07			22190.2	5440.08	29498.6	0	0	NA
2013-10-08			22190.2	5444.83	29897	0	0	NA
2013-10-09			22190.2	5449.63	30297.5	0	0	NA
2013-10-10			22190.2	5454.48	30700.2	0	0	NA
2013-10-11			22190.2	5459.37	31105	0	0	NA
2013-10-12			22190.2	5464.32	31511.9	0	0	NA
2013-10-13			22190.2	5469.31	31921	0	0	NA
2013-10-14			22190.2	5474.36	32332.1	0	0	NA
2013-10-15			22190.2	5479.46	32745.4	0	0	NA
2013-10-16			22190.2	5484.61	33160.7	0	0	NA
2013-10-17			22190.2	5489.81	33578.1	0	0	NA
2013-10-18			22190.2	5495.06	33997.6	0	0	NA
2013-10-19			22190.2	5500.36	34419.1	0	0	NA
2013-10-20			22190.2	5505.72	34842.7	0	0	NA
2013-10-21			22190.2	5511.13	35268.3	0	0	NA
2013-10-22			22190.2	5516.59	35695.9	0	0	NA
2013-10-23			22190.2	5522.1	36125.5	0	0	NA
2013-10-24			22190.2	5527.66	36557.1	0	0	NA
2013-10-25			22190.2	5533.28	36990.7	0	0	NA
2013-10-26			22190.2	5538.95	37426.3	0	0	NA
2013-10-27			22190.2	5544.68	37863.9	0	0	NA
2013-10-28			22190.2	5550.46	38303.4	0	0	NA
2013-10-29			22190.2	5556.29	38744.9	0	0	NA
2013-10-30			22190.2	5562.18	39188.3	0	0	NA
2013-10-31			22190.2	5568.12	39633.6	0	0	NA
2013-11-01			22190.2	5574.12	40080.8	0	0	NA
2013-11-02			22190.2	5580.17	40529.9	0	0	NA
2013-11-03			22190.2	5586.28	40981	0	0	NA
2013-11-04			22190.2	5592.44	41433.9	0	0	NA
2013-11-05			22190.2	5598.66	41888.6	0	0	NA
2013-11-06			22190.2	5604.94	42345.3	0	0	NA
2013-11-07			22190.2	5611.27	42803.8	0	0	NA
2013-11-08			22190.2	5617.66	43264.1	0	0	NA
2013-11-09			22190.2	5624.1	43726.3	0	0	NA
2013-11-10			22190.2	5630.6	44190.2	0	0	NA
2013-11-11			22190.2	5637.16	44656	0	0	NA
2013-11-12			22190.2	5643.78	45123.6	0	0	NA
2013-11-13			22190.2	5650.45	45592.9	0	0	NA
2013-11-14			22190.2	5657.18	46064.1	0	0	NA
2013-11-15			22190.2	5663.98	46537	0	0	NA
2013-11-16			22190.2	5670.82	47011.6	0	0	NA
2013-11-17			22190.2	5677.73	47488	0	0	NA
2013-11-18			22190.2	5684.7	47966.2	0	0	NA
2013-11-19			22190.2	5691.73	48446	0	0	NA
2013-11-20			22190.2	5698.81	48927.6	0	0	NA
2013-11-21			22190.2	5705.96	49410.8	0	0	NA
2013-11-22			22190.2	5713.16	49895.8	0	0	NA
2013-11-23			22190.2	5720.43	50382.4	0	0	NA
2013-11-24			22190.2	5727.75	50870.7	0	0	NA
2013-11-25			22190.2	5735.14	51360.7	0	0	NA
2013-11-26			22190.2	5742.59	51852.3	0	0	NA
2013-11-27			22190.2	5750.1	52345.5	0	0	NA
2013-11-28			22190.2	5757.67	52840.4	0	0	NA
2013-11-29			22190.2	5765.3	53336.8	0	0	NA
2013-11-30			22190.2	5772.99	53834.9	0	0	NA
2013-12-01			22190.2	5780.75	54334.6	0	0	NA
2013-12-02			22190.2	5788.57	54835.9	0	0	NA
2013-12-03			22190.2	5796.45	55338.7	0	0	NA
2013-12-04			22190.2	5804.39	55843.1	0	0	NA
2013-12-05			22190.2	5812.4	56349	0	0	NA
2013-12-06			22190.2	5820.47	56856.5	0	0	NA
2013-12-07			22190.2	5828.6	57365.5	0	0	NA
2013-12-08			22190.2	5836.8	57876.1	0	0	NA
2013-12-09			22190.2	5845.06	58388.1	0	0	NA
2013-12-10			22190.2	5853.39	58901.7	0	0	NA
2013-12-11			22190.2	5861.78	59416.7	0	0	NA
2013-12-12			22190.2	5870.24	59933.2	0	0	NA
2013-12-13			22190.2	5878.76	60451.2	0	0	NA
2013-12-14			22190.2	5887.34	60970.6	0	0	NA
2013-12-15			22190.2	5896	61491.4	0	0	NA
2013-12-16			22190.2	5904.71	62013.7	0	0	NA
2013-12-17			22190.2	5913.5	62537.5	0	0	NA
2013-12-18			22190.2	5922.35	63062.6	0	0	NA
2013-12-19			22190.2	5931.26	63589.2	0	0	NA
2013-12-20			22190.2	5940.25	64117.1	0	0	NA
2013-12-21			22190.2	5949.3	64646.4	0	0	NA
2013-12-22			22190.2	5958.41	65177.1	0	0	NA
2013-12-23			22190.2	5967.6	65709.1	0	0	NA
2013-12-24			22190.2	5976.85	66242.5	0	0	NA
2013-12-25			22190.2	5986.17	66777.2	0	0	NA
2013-12-26			22190.2	5995.56	67313.3	0	0	NA
2013-12-27			22190.2	6005.02	67850.6	0	0	NA
2013-12-28			22190.2	6014.55	68389.3	0	0	NA
2013-12-29			22190.2	6024.14	68929.3	0	0	NA
2013-12-30			22190.2	6033.81	69470.5	0	0	NA
2013-12-31			22190.2	6043.54	70013.1	0	0	NA
2014-01-01			22190.2	6053.34	70556.9	0	0	NA
2014-01-02			22190.2	6063.22	71101.9	0	0	NA
2014-01-03			22190.2	6073.16	71648.2	0	0	NA
2014-01-04			22190.2	6083.18	72195.7	0	0	NA
2014-01-05			22190.2	6093.26	72744.4	0	0	NA
2014-01-06			22190.2	6103.42	73294.4	0	0	NA
2014-01-07			22190.2	6113.64	73845.5	0	0	NA
2014-01-08			22190.2	6123.94	74397.9	0	0	NA
2014-01-09			22190.2	6134.31	74951.4	0	0	NA
2014-01-10			22190.2	6144.76	75506	0	0	NA
2014-01-11			22190.2	6155.27	76061.9	0	0	NA
2014-01-12			22190.2	6165.86	76618.9	0	0	NA
2014-01-13			22190.2	6176.52	77177	0	0	NA
2014-01-14			22190.2	6187.25	77736.2	0	0	NA
2014-01-15			22190.2	6198.05	78296.6	0	0	NA
2014-01-16			22190.2	6208.93	78858	0	0	NA
2014-01-17			22190.2	6219.88	79420.6	0	0	NA
2014-01-18			22190.2	6230.91	79984.2	0	0	NA
2014-01-19			22190.2	6242.01	80548.9	0	0	NA
2014-01-20			22190.2	6253.18	81114.7	0	0	NA
2014-01-21			22190.2	6264.43	81681.5	0	0	NA
2014-01-22			22190.2	6275.76	82249.3	0	0	NA
2014-01-23			22190.2	6287.16	82818.2	0	0	NA
2014-01-24			22190.2	6298.63	83388.1	0	0	NA
2014-01-25			22190.2	6310.18	83959	0	0	NA
2014-01-26			22190.2	6321.81	84530.9	0	0	NA
2014-01-27			22190.2	6333.51	85103.8	0	0	NA
2014-01-28			22190.2	6345.28	85677.7	0	0	NA
2014-01-29			22190.2	6357.14	86252.5	0	0	NA
2014-01-30			22190.2	6369.07	86828.3	0	0	NA
2014-01-31			22190.2	6381.08	87405	0	0	NA
2014-02-01			22190.2	6393.16	87982.6	0	0	NA
2014-02-02			22190.2	6405.33	88561.2	0	0	NA
2014-02-03	0		22190.2	6417.57	89140.7	0	0	NA
2014-02-04	0		22190.2	6429.89	89730.1	0	0	NA
2014-02-05	0	19194.6	22190.2	6442.28	90341.2	0	0	138168
2014-02-06	0	19194.6	22190.2	6454.76	90978.7	0	0	138818
2014-02-07	0	19194.6	22190.2	6467.31	91647	0	0	139499
2014-02-08	0	19194.6	22190.2	6479.95	92350.6	0	0	140215
2014-02-09	0	19194.6	22190.2	6492.66	93094	0	0	140971
2014-02-10	0	19194.6	22190.2	6505.45	93881.8	0	0	141772
2014-02-11	0	19194.6	22190.2	6518.32	94718.3	0	0	142621
2014-02-12	0	19194.6	22190.2	6531.27	95608.2	0	0	143524
2014-02-13	0	19194.6	22190.2	6544.3	96555.8	0	0	144485
2014-02-14	0	19194.6	22190.2	6557.42	97565.8	0	0	145508
2014-02-15	0	19194.6	22190.2	6570.61	98642.6	0	0	146598
2014-02-16	0	19194.6	22190.2	6583.88	99790.6	0	0	147759
2014-02-17	0	19194.6	22190.2	6597.24	101015	0	0	148997
2014-02-18	0	19194.6	22190.2	6610.67	102319	0	0	150314
2014-02-19	0	19194.6	22190.2	6624.19	103708	0	0	151717
2014-02-20	0	19194.6	22190.2	6637.79	105571	0	0	153594
2014-02-21	0	19194.6	22190.2	6651.47	108213	0	0	156250
2014-02-22	0	19194.6	22190.2	6665.24	111510	0	0	159560
2014-02-23	0	19194.6	22190.2	6679.08	115337	0	0	163401
2014-02-24	0	19194.6	22190.2	6693.01	119571	0	0	167649
2014-02-25	0	19194.6	22190.2	6707.03	124087	0	0	172179
2014-02-26	0	19194.6	22190.2	6721.12	128762	0	0	176868
2014-02-27	0	19194.6	22190.2	6735.3	133471	0	0	181591
2014-02-28	0	19194.6	22190.2	6749.57	138091	0	0	186225
2014-03-01	0	19194.6	22190.2	6801.62	142497	0	0	190683
2014-03-02	0	19194.6	22190.2	6927.8	146565	0	0	194878
2014-03-03	0	19194.6	22190.2	7126.03	150172	0	0	198683
2014-03-04	0	19194.6	22190.2	7394.26	153194	0	0	201973
2014-03-05	0	19194.6	22190.2	7730.42	155505	0	0	204620
2014-03-06	0	19194.6	22190.2	8132.44	156983	0	0	206500
2014-03-07	0	19194.6	22190.2	8598.26	157503	0	0	207486
2014-03-08	0	19194.6	22190.2	9125.81	157500	0	0	208011
2014-03-09	0	19194.6	22190.2	9713.03	157492	0	0	208589
2014-03-10	0	19194.6	22190.2	10357.9	157477	0	0	209220
2014-03-11	0	19194.6	22190.2	11058.2	157457	0	0	209900
2014-03-12	0	19194.6	22190.2	11812.1	157431	0	0	210628
2014-03-13	0	19194.6	22190.2	12617.3	157400	0	0	211402
2014-03-14	0	19194.6	22190.2	13471.9	157363	0	0	212220
2014-03-15	0	19194.6	22190.2	14373.8	157321	0	0	213080
2014-03-16	0	19194.6	22190.2	15320.9	157274	0	0	213979
2014-03-17	0	19194.6	22190.2	16311.2	157221	0	0	214917
2014-03-18	0	19194.6	22190.2	17342.6	157163	0	0	215890
2014-03-19	0	19194.6	22190.2	18412.9	157100	0	0	216898
2014-03-20	0	19194.6	22190.2	19520.3	157032	0	0	217937
2014-03-21	0	19194.6	22190.2	20662.5	156959	0	0	219007
2014-03-22	0	19194.6	22190.2	21837.5	156881	0	0	220104
2014-03-23	0	19194.6	22190.2	23043.4	156799	0	0	221227
2014-03-24	0	19194.6	22190.2	24277.9	156711	0	0	222374
2014-03-25	0	19194.6	22190.2	25539.1	156619	0	0	223543
2014-03-26	0	19194.6	22190.2	26824.8	156523	0	0	224732
2014-03-27	0	19194.6	22190.2	28133	156421	0	0	225939
2014-03-28	0	19194.6	22190.2	29461.7	156316	0	0	227162
2014-03-29	0	19194.6	22190.2	30808.8	156206	0	0	228399
2014-03-30	0	19194.6	22190.2	32172.2	156091	0	0	229648
2014-03-31	0	19194.6	22190.2	33549.8	155973	0	0	230907
2014-04-01	0	19194.6	22190.2	34939.6	155850	0	0	232174
2014-04-02	0	19194.6	22190.2	36556.7	155723	25.8179	0	233690
2014-04-03	0	19194.6	22190.2	38596.8	155592	101.074	0	235675
2014-04-04	0	19194.6	22190.2	41028.8	155457	222.473	0	238093
2014-04-05	0	19194.6	22190.2	43821.6	155318	386.719	0	240912
2014-04-06	0	19194.6	22190.2	46944.1	155176	590.515	0	244095
2014-04-07	0	19194.6	22190.2	50365.2	155029	830.566	0	247610
2014-04-08	0	19194.6	22190.2	54053.8	154879	1103.58	0	251422
2014-04-09	339.025	19194.6	22190.2	57978.8	154660	1406.25	37.921	255807
2014-04-10	1310.19	19194.6	22190.2	62109	154319	1735.29	148.457	261006
2014-04-11	2844.64	19194.6	22190.2	66413.3	153874	2087.4	326.766	266931
2014-04-12	4873.5	19194.6	22190.2	70860.7	153345	2459.29	568.008	273491
2014-04-13	7327.91	19194.6	22190.2	75420.1	152750	2847.66	867.342	280597
2014-04-14	10139	19194.6	22190.2	80060.2	152108	3249.21	1219.93	288161
2014-04-15	13238	19194.6	22190.2	84750.1	151438	3660.64	1620.92	296092
2014-04-16	16555.9	19194.6	22190.2	89458.6	150758	4078.67	2065.48	304302
2014-04-17	20023.9	19194.6	22190.2	94154.6	150088	4500	2548.77	312701
2014-04-18	23573.1	19194.6	22190.2	98807.1	149447	4921.33	3065.95	321199
2014-04-19	27134.7	19194.6	22190.2	103385	148852	5339.36	3612.18	329708
2014-04-20	30639.8	19194.6	22190.2	107857	148324	5750.79	4182.6	338139
2014-04-21	34019.6	19194.6	22190.2	112192	147880	6152.34	4772.4	346401
2014-04-22	37205.2	19194.6	22190.2	116359	147540	6540.71	5376.71	354406
2014-04-23	40127.7	19194.6	22190.2	120326	147322	6912.6	5990.71	362064
2014-04-24	42718.3	19194.6	22190.2	124064	147245	7264.71	6609.55	369286
2014-04-25	45127	19194.6	22190.2	127540	147276	7593.75	7228.39	376150
2014-04-26	47549.6	19194.6	22190.2	130724	147366	7896.42	7842.38	382763
2014-04-27	49985.5	19194.6	22190.2	133584	147504	8169.43	8446.7	389075
2014-04-28	52434.2	19194.6	22190.2	136089	147684	8409.48	9036.49	395039
2014-04-29	54895.1	19194.6	22190.2	138209	147897	8613.28	9606.92	400606
2014-04-30	57367.6	19194.6	22190.2	139912	148134	8777.53	10153.1	405730
2014-05-01	59851.3	19194.6	22190.2	141167	148388	8898.93	10670.3	410361
2014-05-02	62345.5	19194.6	22190.2	141942	148651	8974.18	11153.6	414451
2014-05-03	64849.7	19194.6	22190.2	142208	148913	9000	11598.2	417953
2014-05-04	67363.4	19194.6	22190.2	142208	149167	8999.74	11999.2	421121
2014-05-05	69885.9	19194.6	22190.2	142207	149404	8998.98	12351.8	424232
2014-05-06	72416.8	19194.6	22190.2	142205	149617	8997.73	12651.1	427273
2014-05-07	74955.5	19194.6	22190.2	142203	149797	8995.99	12892.3	430228
2014-05-08	77501.5	19194.6	22190.2	142200	149936	8993.77	13070.6	433086
2014-05-09	80054.2	19194.6	22190.2	142196	150025	8991.08	13181.2	435832
2014-05-10	82613	19194.6	22190.2	142192	150056	8987.93	13219.1	438453
2014-05-11	85177.4	19194.6	22190.2	142188	150019	8984.34	13207.1	440960
2014-05-12	87746.9	19194.6	22190.2	142182	149914	8980.3	13173.2	443382
2014-05-13	90320.8	19194.6	22190.2	142176	149751	8975.83	13120.4	445729
2014-05-14	92898.7	19194.6	22190.2	142170	149539	8970.94	13052	448016
2014-05-15	95480	19194.6	22190.2	142163	149289	8965.64	12971.1	450253
2014-05-16	98064.1	19194.6	22190.2	142155	149010	8959.93	12880.8	452454
2014-05-17	100651	19194.6	22190.2	142147	148711	8953.83	12784.3	454631
2014-05-18	103239	19194.6	22190.2	142138	148402	8947.34	12684.5	456796
2014-05-19	105828	19194.6	22190.2	142129	148094	8940.47	12584.8	458961
2014-05-20	108418	19194.6	22190.2	142119	147795	8933.24	12488.3	461138
2014-05-21	111008	19194.6	22190.2	142108	147515	8925.65	12398	463340
2014-05-22	113598	19194.6	22190.2	142097	147265	8917.72	12317	465580
2014-05-23	116186	19194.6	22190.2	142086	147053	8909.44	12248.7	467869
2014-05-24	118774	19194.6	22190.2	142074	146890	8900.83	12195.9	470219
2014-05-25	121359	19194.6	22190.2	142061	146785	8891.9	12162	472644
2014-05-26	123941	19194.6	22190.2	142048	146748	8882.66	12150	475154
2014-05-27	126520	19194.6	22259.5	142034	146761	8873.12	12153.6	477796
2014-05-28	129095	19194.6	22465.5	142020	146799	8863.28	12164.4	480602
2014-05-29	131666	19194.6	22805	142006	146862	8853.16	12182.2	483569
2014-05-30	134232	19194.6	23275.2	141991	146948	8842.76	12206.8	486691
2014-05-31	136793	19194.6	23873	141975	147058	8832.09	12238	489964
2014-06-01	139348	19194.6	24595.3	141959	147191	8821.17	12275.6	493384
2014-06-02	141896	19194.6	25439.3	141942	147345	8810	12319.4	496947
2014-06-03	144437	19194.6	26401.8	141925	147521	8798.6	12369.3	500648
2014-06-04	146971	19194.6	27479.8	141908	147718	8786.96	12425.1	504483
2014-06-05	149496	19194.6	28670.4	141890	147934	8775.1	12486.6	508447
2014-06-06	152013	19194.6	29970.6	141872	148170	8763.03	12553.5	512537
2014-06-07	154520	19194.6	31377.2	141853	148425	8750.76	12625.8	516747
2014-06-08	157018	19194.6	32887.4	141834	148698	8738.3	12703.3	521073
2014-06-09	159505	19194.6	34498.1	141814	148989	8725.65	12785.7	525511
2014-06-10	161981	19194.6	36206.3	141794	149296	8712.83	12872.8	530057
2014-06-11	164446	19194.6	38009	141774	149619	8699.85	12964.6	534707
2014-06-12	166899	19194.6	39903.2	141753	149958	8686.7	13060.8	539455
2014-06-13	169339	19194.6	41885.8	141731	150312	8673.42	13161.1	544297
2014-06-14	171766	19194.6	43953.9	141710	150680	8659.99	13265.6	549229
2014-06-15	174179	19194.6	46104.5	141688	151062	8646.43	13373.9	554248
2014-06-16	176578	19194.6	48334.5	141665	151456	8632.76	13485.8	559347
2014-06-17	178963	19194.6	50640.9	141642	151863	8618.97	13601.2	564524
2014-06-18	181332	19194.6	53020.8	141619	152282	8605.09	13720	569773
2014-06-19	183685	19194.6	55471	141595	152711	8591.11	13841.9	575090
2014-06-20	186022	19194.6	57988.7	141572	153151	8577.05	13966.7	580471
2014-06-21	188341	19194.6	60570.7	141547	153600	8562.92	14094.2	585911
2014-06-22	190643	19194.6	63214.2	141523	154059	8548.72	14224.3	591407
2014-06-23	192928	19194.6	65916	141498	154526	8534.47	14356.9	596953
2014-06-24	195193	19194.6	68673.2	141472	155001	8520.17	14491.6	602546
2014-06-25	197439	19194.6	71482.7	141447	155483	8505.83	14628.3	608180
2014-06-26	199666	19194.6	74341.6	141421	155971	8491.47	14766.9	613852
2014-06-27	201872	19194.6	77246.8	141394	156465	8477.09	14907.1	619558
2014-06-28	204058	19194.6	80195.3	141368	156965	8462.7	15048.8	625292
2014-06-29	206222	19194.6	83184.2	141341	157469	8448.31	15191.8	631050
2014-06-30	208364	19194.6	86210.3	141314	157977	8433.93	15335.9	636829
2014-07-01	210483	19194.6	89270.8	141286	158488	8419.56	15480.8	642623
2014-07-02	212580	19194.6	92362.5	141259	159001	8405.23	15626.6	648428
2014-07-03	214653	19194.6	95482.5	141231	159517	8390.93	15772.9	654241
2014-07-04	216702	19194.6	98627.8	141202	160034	8376.68	15919.5	660056
2014-07-05	218726	19194.6	101795	141174	160551	8362.48	16066.3	665869
2014-07-06	220725	19194.6	104982	141145	161069	8348.35	16213.2	671676
2014-07-07	222698	19194.6	108185	141116	161585	8334.29	16359.8	677473
2014-07-08	224645	19194.6	111401	141086	162101	8320.31	16506.1	683254
2014-07-09	226564	19194.6	114628	141057	162615	8306.42	16651.8	689017
2014-07-10	228457	19194.6	117861	141027	163126	8292.64	16796.8	694755
2014-07-11	230321	19194.6	121099	140997	163633	8278.96	16940.9	700466
2014-07-12	232157	19194.6	124338	140967	164137	8265.41	17083.9	706144
2014-07-13	233964	19194.6	127576	140936	164637	8251.98	17225.6	711785
2014-07-14	235741	19194.6	130808	140906	165131	8238.69	17365.8	717385
2014-07-15	237488	19194.6	134033	140875	165619	8225.55	17504.4	722939
2014-07-16	239204	19194.6	137246	140844	166101	8212.56	17641.1	728444
2014-07-17	240889	19194.6	140446	140813	166576	8199.74	17775.8	733894
2014-07-18	242542	19194.6	143629	140781	167043	8187.1	17908.3	739285
2014-07-19	244162	19194.6	146792	140750	167502	8174.63	18038.5	744614
2014-07-20	245750	19194.6	149932	140718	167951	8162.36	18166	749874
2014-07-21	247304	19194.6	153047	140686	168391	8150.3	18290.8	755064
2014-07-22	248824	19194.6	156132	140654	168821	8138.44	18412.7	760176
2014-07-23	250310	19194.6	159186	140621	169239	8126.8	18531.4	765209
2014-07-24	251760	19194.6	162204	140589	169646	8115.39	18646.9	770156
2014-07-25	253175	19194.6	165185	140557	170041	8104.23	18758.8	775014
2014-07-26	254553	19194.6	168124	140524	170422	8093.3	18867.1	779778
2014-07-27	255895	19194.6	171020	140491	170790	8082.64	18971.5	784445
2014-07-28	257199	19194.6	173869	140458	171144	8072.24	19071.9	789008
2014-07-29	258465	19194.6	176667	140425	171483	8062.12	19168.1	793465
2014-07-30	259693	19194.6	179413	140392	171806	8052.28	19259.8	797811
2014-07-31	260882	19194.6	182103	140359	172114	8042.74	19347	802041
2014-08-01	262031	19194.6	184734	140325	172404	8033.5	19429.4	806151
2014-08-02	263140	19194.6	187303	140292	172677	8024.57	19506.8	810137
2014-08-03	264208	19194.6	189806	140258	172932	8015.96	19579.1	813994
2014-08-04	265236	19194.6	192242	140225	173168	8007.68	19646.1	817719
2014-08-05	266221	19194.6	194607	140191	173384	7999.74	19707.6	821305
2014-08-06	267164	19194.6	196897	140157	173581	7992.16	19763.4	824750
2014-08-07	268064	19194.6	199111	140124	173757	7984.92	19813.3	828048
2014-08-08	268921	19194.6	201244	140090	173911	7978.06	19857.1	831196
2014-08-09	269734	19194.6	203294	140056	174044	7971.57	19894.7	834189
2014-08-10	270503	19194.6	205259	140022	174154	7965.47	19925.9	837023
2014-08-11	271226	19194.6	207134	139988	174240	7959.76	19950.5	839693
2014-08-12	271904	19194.6	208917	139954	174303	7954.46	19968.2	842195
2014-08-13	272535	19194.6	210605	139920	174341	7949.57	19979	844524
2014-08-14	273120	19194.6	212195	139886	174354	7945.1	19982.7	846677
2014-08-15	273678	19194.6	213744	139852	174341	7941.06	19981.5	848733
2014-08-16	274231	19483.8	215311	139818	174304	7937.47	19977.9	851064
2014-08-17	274778	20346.1	216894	139784	174244	7934.32	19971.9	853952
2014-08-18	275320	21773.3	218490	139750	174161	7931.63	19963.8	857390
2014-08-19	275856	23757.2	220098	139716	174057	7929.41	19953.5	861367
2014-08-20	276386	26289.7	221715	139682	173932	7927.67	19941.1	865873
2014-08-21	276911	29362.7	223339	139648	173787	7926.41	19926.6	870901
2014-08-22	277431	32968	224967	139614	173624	7925.65	19910.3	876441
2014-08-23	277945	37097.3	226599	139580	173444	7925.4	19892.1	882483
2014-08-24	278454	41742.7	228231	139547	173247	7925.9	19872.1	889018
2014-08-25	278957	46895.9	229861	139513	173034	7927.36	19850.4	896038
2014-08-26	279456	52548.8	231487	139479	172806	7929.71	19827	903534
2014-08-27	279949	58693.2	233107	139445	172565	7932.9	19802.1	911495
2014-08-28	280437	65321	234719	139412	172312	7936.85	19775.7	919913
2014-08-29	280920	72424	236321	139378	172046	7941.51	19747.9	928779
2014-08-30	281397	79994.1	237910	139345	171770	7946.81	19718.8	938082
2014-08-31	281870	88023.1	239484	139312	171484	7952.68	19688.4	947814
2014-09-01	282338	96502.9	241042	139279	171190	7959.06	19656.8	957966
2014-09-02	282800	105425	242580	139245	170887	7965.89	19624.1	968528
2014-09-03	283258	114782	244097	139212	170578	7973.11	19590.3	979491
2014-09-04	283711	124565	245591	139180	170263	7980.64	19555.6	990846
2014-09-05	284158	134767	247060	139147	169943	7988.43	19520.1	1.00258e+06
2014-09-06	284601	145378	248500	139114	169620	7996.42	19483.7	1.01469e+06
2014-09-07	285040	156391	249911	139082	169293	8004.53	19446.5	1.02717e+06
2014-09-08	285473	167798	251289	139049	168965	8012.7	19408.7	1.04e+06
2014-09-09	285902	179591	252634	139017	168636	8020.87	19370.4	1.05317e+06
2014-09-10	286326	191760	253941	138985	168306	8028.98	19331.5	1.06668e+06
2014-09-11	286746	204300	255211	138953	167978	8036.96	19292.2	1.08052e+06
2014-09-12	287161	217200	256439	138922	167652	8044.75	19252.5	1.09467e+06
2014-09-13	287571	230453	257625	138890	167329	8052.29	19212.5	1.10913e+06
2014-09-14	287977	244051	258765	138859	167010	8059.5	19172.4	1.12389e+06
2014-09-15	288378	257985	259859	138828	166696	8066.33	19132.1	1.13894e+06
2014-09-16	288775	272248	260902	138797	166387	8072.72	19091.7	1.15427e+06
2014-09-17	289168	286832	261894	138766	166086	8078.59	19051.4	1.16988e+06
2014-09-18	289556	301727	262833	138735	165793	8083.89	19011.1	1.18574e+06
2014-09-19	289940	316927	263715	138705	165508	8088.54	18971	1.20186e+06
2014-09-20	290320	332423	264540	138675	165234	8092.5	18931.2	1.21821e+06
2014-09-21	290695	348206	265304	138645	164970	8095.68	18891.6	1.23481e+06
2014-09-22	291066	364269	266005	138615	164718	8098.04	18852.5	1.25162e+06
2014-09-23	291434	380603	266642	138586	164479	8099.5	18813.8	1.26866e+06
2014-09-24	291796	397200	267212	138557	164254	8100	18775.7	1.2859e+06
2014-09-25	292155	414053	267713	138527	164044	8099.56	18738.2	1.30333e+06
2014-09-26	292510	431153	268143	138497	163849	8098.27	18701.3	1.32095e+06
2014-09-27	292861	448491	268500	138466	163671	8096.19	18665.3	1.33875e+06
2014-09-28	293208	466060	268781	138435	163511	8093.38	18630.1	1.35672e+06
2014-09-29	293551	483852	268985	138403	163369	8089.89	18595.8	1.37485e+06
2014-09-30	293890	501858	269109	138370	163247	8085.78	18562.5	1.39312e+06
2014-10-01	294225	520070	269150	138337	163146	8081.11	18530.2	1.41154e+06
2014-10-02	294557	538480	269146	138303	163056	8075.93	18498	1.43012e+06
2014-10-03	294885	557080	269133	138269	162966	8070.29	18464.6	1.44887e+06
2014-10-04	295209	575862	269111	138234	162877	8064.27	18430.2	1.46779e+06
2014-10-05	295529	594818	269081	138199	162788	8057.9	18394.8	1.48687e+06
2014-10-06	295846	613939	269043	138163	162700	8051.25	18358.5	1.5061e+06
2014-10-07	296159	633217	268996	138126	162612	8044.38	18321.3	1.52548e+06
2014-10-08	296468	652644	268941	138089	162525	8037.33	18283.2	1.54499e+06
2014-10-09	296774	672212	268879	138052	162439	8030.18	18244.3	1.56463e+06
2014-10-10	297077	691914	268809	138014	162352	8022.97	18204.7	1.58439e+06
2014-10-11	297376	711740	268731	137976	162267	8015.75	18164.4	1.60427e+06
2014-10-12	297671	731682	268645	137937	162182	8008.6	18123.5	1.62425e+06
2014-10-13	297964	751733	268553	137898	162098	8001.55	18081.9	1.64433e+06
2014-10-14	298253	771884	268453	137858	162014	7994.68	18039.9	1.6645e+06
2014-10-15	298538	792127	268346	137818	161930	7988.03	17997.3	1.68475e+06
2014-10-16	298821	812454	268232	137778	161848	7981.67	17954.4	1.70507e+06
2014-10-17	299100	832857	268112	137737	161765	7975.64	17911	1.72546e+06
2014-10-18	299376	853327	267984	137696	161684	7970	17867.3	1.7459e+06
2014-10-19	299649	873857	267851	137654	161603	7964.82	17823.4	1.7664e+06
2014-10-20	299919	894439	267711	137612	161522	7960.15	17779.2	1.78694e+06
2014-10-21	300186	915063	267564	137570	161442	7956.04	17734.9	1.80752e+06
2014-10-22	300450	935723	267412	137528	161363	7952.55	17690.4	1.82812e+06
2014-10-23	300711	956409	267254	137485	161284	7949.74	17645.8	1.84874e+06
2014-10-24	300969	977114	267089	137442	161206	7947.66	17601.3	1.86937e+06
2014-10-25	301224	997829	266920	137399	161128	7946.37	17556.7	1.89e+06
2014-10-26	301476	1.01855e+06	266744	137356	161051	7945.93	17512.3	1.91063e+06
2014-10-27	301725	1.03926e+06	266563	137312	160974	7945.93	17468	1.93125e+06
2014-10-28	301972	1.05996e+06	266377	137268	160898	7945.93	17423.8	1.95184e+06
2014-10-29	302216	1.08063e+06	266186	137224	160823	7945.94	17379.9	1.97241e+06
2014-10-30	302457	1.10128e+06	265990	137180	160748	7945.94	17336.3	1.99294e+06
2014-10-31	302696	1.12189e+06	265789	137135	160674	7945.95	17293.1	2.01342e+06
2014-11-01	302932	1.14245e+06	265584	137091	160601	7945.96	17250.2	2.03385e+06
2014-11-02	303165	1.16296e+06	265373	137046	160528	7945.97	17207.8	2.05422e+06
2014-11-03	303396	1.1834e+06	265159	137001	160456	7945.98	17165.8	2.07452e+06
2014-11-04	303624	1.20377e+06	264940	136956	160384	7945.99	17124.4	2.09475e+06
2014-11-05	303850	1.22407e+06	264717	136911	160313	7946.01	17083.6	2.11489e+06
2014-11-06	304074	1.24427e+06	264490	136866	160242	7946.03	17043.5	2.13493e+06
2014-11-07	304295	1.26438e+06	264259	136821	160173	7946.05	17004.1	2.15488e+06
2014-11-08	304514	1.28439e+06	264024	136775	160103	7946.07	16965.4	2.17472e+06
2014-11-09	304730	1.30429e+06	263786	136730	160035	7946.1	16927.5	2.19444e+06
2014-11-10	304944	1.32406e+06	263544	136685	159967	7946.12	16890.5	2.21404e+06
2014-11-11	305156	1.34371e+06	263299	136639	159900	7946.15	16854.4	2.23351e+06
2014-11-12	305366	1.36322e+06	263051	136594	159833	7946.18	16819.2	2.25283e+06
2014-11-13	305574	1.38259e+06	262799	136549	159767	7946.22	16785	2.27201e+06
2014-11-14	305780	1.40181e+06	262545	136503	159702	7946.26	16751.9	2.29103e+06
2014-11-15	305983	1.42086e+06	262288	136458	159637	7946.3	16720	2.30989e+06
2014-11-16	306185	1.43974e+06	262029	136413	159573	7946.34	16689.1	2.32858e+06
2014-11-17	306384	1.45845e+06	261767	136368	159509	7946.38	16659.6	2.34709e+06
2014-11-18	306582	1.47698e+06	261502	136323	159447	7946.43	16631.2	2.36541e+06
2014-11-19	306778	1.49531e+06	261235	136278	159384	7946.48	16604.2	2.38353e+06
2014-11-20	306971	1.51344e+06	260967	136233	159323	7946.54	16578.6	2.40146e+06
2014-11-21	307164	1.53136e+06	260696	136188	159262	7946.59	16554.3	2.41917e+06
2014-11-22	307354	1.54906e+06	260424	136144	159202	7946.65	16531.6	2.43666e+06
2014-11-23	307542	1.56653e+06	260150	136099	159143	7946.72	16510.4	2.45392e+06
2014-11-24	307729	1.58377e+06	259874	136055	159084	7946.78	16490.7	2.47095e+06
2014-11-25	307914	1.60077e+06	259597	136011	159026	7946.86	16472.7	2.48774e+06
2014-11-26	308098	1.61752e+06	259319	135967	158968	7946.93	16456.3	2.50428e+06
2014-11-27	308280	1.63401e+06	259039	135923	158911	7947.01	16441.7	2.52056e+06
2014-11-28	308460	1.65024e+06	258759	135880	158855	7947.09	16428.9	2.53657e+06
2014-11-29	308639	1.66619e+06	258478	135837	158800	7947.17	16417.9	2.55231e+06
2014-11-30	308817	1.68185e+06	258196	135794	158745	7947.26	16408.8	2.56776e+06
2014-12-01	308993	1.69723e+06	257913	135751	158691	7947.35	16401.6	2.58293e+06
2014-12-02	309168	1.71231e+06	257631	135709	158638	7947.45	16396.4	2.5978e+06
2014-12-03	309341	1.72708e+06	257348	135667	158586	7947.55	16393.3	2.61236e+06
2014-12-04	309513	1.74153e+06	257064	135625	158534	7947.65	16392.2	2.6266e+06
2014-12-05	309683	1.75594e+06	256781	135584	158482	7947.76	16421.6	2.64084e+06
2014-12-06	309850	1.77057e+06	256498	135543	158432	7947.87	16510.4	2.65536e+06
2014-12-07	310015	1.78543e+06	256215	135502	158382	7947.99	16659.6	2.67015e+06
2014-12-08	310176	1.8005e+06	255933	135461	158333	7948.11	16869.9	2.68522e+06
2014-12-09	310335	1.81577e+06	255651	135421	158285	7948.24	17142.2	2.70055e+06
2014-12-10	310492	1.83123e+06	255370	135382	158237	7948.37	17477.5	2.71614e+06
2014-12-11	310646	1.84689e+06	255089	135343	158190	7948.5	17876.6	2.73198e+06
2014-12-12	310798	1.86272e+06	254810	135304	158144	7948.64	18340.3	2.74807e+06
2014-12-13	310947	1.87872e+06	254532	135266	158099	7948.78	18869.6	2.76439e+06
2014-12-14	311094	1.89489e+06	254255	135228	158054	7948.93	19465.4	2.78094e+06
2014-12-15	311238	1.91121e+06	253979	135190	158010	7949.08	20128.5	2.79771e+06
2014-12-16	311381	1.92768e+06	253705	135154	157967	7949.24	20859.7	2.8147e+06
2014-12-17	311521	1.94429e+06	253433	135117	157925	7949.4	21660.1	2.8319e+06
2014-12-18	311659	1.96103e+06	253162	135081	157883	7949.57	22530.3	2.8493e+06
2014-12-19	311794	1.9779e+06	252893	135046	157842	7949.74	23471.5	2.86689e+06
2014-12-20	311928	1.99488e+06	252627	135011	157802	7949.92	24484.3	2.88468e+06
2014-12-21	312060	2.01196e+06	252362	134977	157762	7950.1	25569.7	2.90264e+06
2014-12-22	312190	2.02915e+06	252100	134943	157724	7950.29	26728.5	2.92078e+06
2014-12-23	312318	2.04642e+06	251840	134910	157686	7950.49	27961.7	2.93909e+06
2014-12-24	312444	2.06378e+06	251583	134877	157649	7950.69	29270.1	2.95756e+06
2014-12-25	312569	2.08122e+06	251329	134845	157612	7950.89	30654.6	2.97618e+06
2014-12-26	312692	2.09872e+06	251078	134814	157577	7951.1	32116.1	2.99495e+06
2014-12-27	312813	2.11628e+06	250830	134783	157542	7951.32	33655.4	3.01386e+06
2014-12-28	312933	2.1339e+06	250585	134753	157508	7951.54	35273.4	3.0329e+06
2014-12-29	313051	2.15155e+06	250343	134724	157474	7951.77	36971.1	3.05207e+06
2014-12-30	313167	2.16924e+06	250105	134695	157442	7952	38749.2	3.07135e+06
2014-12-31	313282	2.18696e+06	249870	134667	157410	7952.24	40608.7	3.09075e+06
2015-01-01	313396	2.2047e+06	249639	134640	157379	7952.48	42550.4	3.11026e+06
2015-01-02	313508	2.22245e+06	249412	134614	157349	7952.73	44575.2	3.12986e+06
2015-01-03	313619	2.2402e+06	249189	134588	157320	7952.99	46684	3.14955e+06
2015-01-04	313729	2.25795e+06	248970	134563	157291	7953.25	48877.7	3.16933e+06
2015-01-05	313838	2.27568e+06	248755	134538	157264	7953.52	51157.2	3.18919e+06
2015-01-06	313946	2.2934e+06	248545	134515	157237	7953.8	53523.2	3.20911e+06
2015-01-07	314052	2.31108e+06	248339	134492	157210	7954.08	55976.8	3.22911e+06
2015-01-08	314158	2.32873e+06	248138	134470	157185	7954.37	58518.7	3.24915e+06
2015-01-09	314263	2.34633e+06	247942	134449	157161	7954.67	61149.9	3.26925e+06
2015-01-10	314366	2.36388e+06	247751	134429	157137	7954.97	63871.3	3.28939e+06
2015-01-11	314469	2.38137e+06	247565	134409	157114	7955.28	66683.6	3.30957e+06
2015-01-12	314572	2.39879e+06	247384	134391	157092	7955.59	69587.8	3.32977e+06
2015-01-13	314673	2.41614e+06	247209	134373	157071	7955.92	72584.8	3.35e+06
2015-01-14	314774	2.4334e+06	247039	134356	157051	7956.25	75675.5	3.37025e+06
2015-01-15	314874	2.45056e+06	246875	134341	157031	7956.58	78860.7	3.3905e+06
2015-01-16	314973	2.46763e+06	246717	134326	157012	7956.93	82141.2	3.41075e+06
2015-01-17	315072	2.48458e+06	246564	134312	156994	7957.28	85518.1	3.431e+06
2015-01-18	315171	2.50142e+06	246418	134299	156977	7957.63	88992.1	3.45124e+06
2015-01-19	315269	2.51814e+06	246278	134287	156961	7958	92564.2	3.47145e+06
2015-01-20	315367	2.53472e+06	246144	134275	156946	7958.37	96235.1	3.49165e+06
2015-01-21	315465	2.55116e+06	246017	134265	156931	7958.75	100006	3.5118e+06
2015-01-22	315562	2.56745e+06	245896	134256	156918	7959.14	103877	3.53192e+06
2015-01-23	315659	2.58359e+06	245783	134248	156905	7959.53	107850	3.55199e+06
2015-01-24	315756	2.59956e+06	245676	134241	156893	7959.93	111926	3.57201e+06
2015-01-25	315853	2.61536e+06	245576	134235	156882	7960.34	116104	3.59197e+06
2015-01-26	315950	2.63097e+06	245483	134230	156872	7960.76	120387	3.61186e+06
2015-01-27	316047	2.6464e+06	245398	134226	156863	7961.19	124775	3.63167e+06
2015-01-28	316144	2.66163e+06	245320	134223	156854	7961.62	129269	3.6514e+06
2015-01-29	316241	2.67666e+06	245250	134222	156847	7962.06	133870	3.67105e+06
2015-01-30	316339	2.69147e+06	245187	134221	156840	7962.51	138578	3.6906e+06
2015-01-31	316436	2.70606e+06	245133	134274	156834	8057.34	143395	3.71019e+06
2015-02-01	316534	2.72042e+06	245086	134424	156829	8336.23	148321	3.72996e+06
2015-02-02	316633	2.73455e+06	245048	134657	156825	8792.14	153358	3.74986e+06
2015-02-03	316731	2.74843e+06	245018	134959	156822	9418.05	158506	3.76988e+06
2015-02-04	316830	2.76206e+06	244996	135316	156820	10206.9	163766	3.78999e+06
2015-02-05	316930	2.77543e+06	244983	135715	156818	11151.7	169139	3.81016e+06
2015-02-06	317030	2.78853e+06	244978	136142	156818	12245.4	174625	3.83036e+06
2015-02-07	317131	2.80135e+06	244981	136582	156818	13480.9	183409	3.85375e+06
2015-02-08	317233	2.81388e+06	244988	137022	156818	14851.2	198253	3.88305e+06
2015-02-09	317335	2.82613e+06	245000	137449	156818	16349.4	218531	3.91761e+06
2015-02-10	317438	2.83807e+06	245017	137848	156818	17968.3	243614	3.95677e+06
2015-02-11	317542	2.8497e+06	245038	138205	156818	19700.9	272875	3.99988e+06
2015-02-12	317647	2.86102e+06	245064	138507	156818	21540.1	305687	4.04628e+06
2015-02-13	317753	2.87201e+06	245093	138740	156818	23479.1	341422	4.09532e+06
2015-02-14	317860	2.88267e+06	245127	138890	156818	25510.6	379453	4.14633e+06
2015-02-15	317968	2.89299e+06	245164	138943	156818	27627.7	419151	4.19866e+06
2015-02-16	318077	2.90295e+06	245206	138928	156818	31847.7	459890	4.25372e+06
2015-02-17	318187	2.91257e+06	245250	138885	156818	40073.9	501042	4.31282e+06
2015-02-18	318299	2.92181e+06	245298	138815	156818	52128.4	541979	4.37515e+06
2015-02-19	318411	2.93069e+06	245350	138720	156818	67833.1	582073	4.43989e+06
2015-02-20	318525	2.93918e+06	245404	138602	156818	87010.2	620698	4.50624e+06
2015-02-21	318641	2.94728e+06	245462	138464	156818	109482	657226	4.57337e+06
2015-02-22	318758	2.95499e+06	245522	138306	156818	135069	691028	4.64049e+06
2015-02-23	318876	2.96229e+06	245585	138132	156818	163596	722715	4.70801e+06
2015-02-24	318996	2.96918e+06	245651	137942	156818	194882	753456	4.77692e+06
2015-02-25	319117	2.97564e+06	245719	137739	156818	228752	783470	4.84726e+06
2015-02-26	319241	2.98168e+06	245789	137524	156818	265025	812973	4.91905e+06
2015-02-27	319366	2.98728e+06	245861	137300	156818	303526	842182	4.99234e+06
2015-02-28	319492	2.99244e+06	245935	137069	156818	344075	871312	5.06714e+06
2015-03-01	319621	2.99714e+06	246011	136832	156818	386495	900582	5.1435e+06
2015-03-02	319751	3.00138e+06	246089	136590	156818	430607	930207	5.22145e+06
2015-03-03	319884	3.00516e+06	246168	136347	156818	476234	960404	5.30101e+06
2015-03-04	320018	3.00845e+06	246248	136104	156818	523198	991391	5.38223e+06
2015-03-05	320154	3.01126e+06	246330	135863	156818	571321	1.02338e+06	5.46513e+06
2015-03-06	320293	3.01358e+06	246412	135626	156818	620424	1.0566e+06	5.54975e+06
2015-03-07	320433	3.0154e+06	246496	135394	156818	670331	1.09125e+06	5.63612e+06
2015-03-08	320576	3.01671e+06	246580	135170	156818	720862	1.12756e+06	5.72428e+06
2015-03-09	320721	3.0175e+06	246665	134956	156818	771841	1.16575e+06	5.81424e+06
2015-03-10	320869	3.01776e+06	246751	134753	156818	823088	1.20602e+06	5.90606e+06
2015-03-11	321031	3.01765e+06	246853	134563	156823	874427	1.25083e+06	6.00218e+06
2015-03-12	321217	3.01735e+06	246986	134388	156836	925679	1.30185e+06	6.1043e+06
2015-03-13	321423	3.01688e+06	247144	134231	156856	976665	1.35812e+06	6.21132e+06
2015-03-14	321644	3.01626e+06	247323	134093	156882	1.02721e+06	1.41869e+06	6.3221e+06
2015-03-15	321874	3.01554e+06	247516	133975	156913	1.07713e+06	1.4826e+06	6.43555e+06
2015-03-16	322109	3.01473e+06	247720	133880	156948	1.12626e+06	1.5489e+06	6.55055e+06
2015-03-17	322345	3.01387e+06	247928	133810	156986	1.1744e+06	1.61664e+06	6.66598e+06
2015-03-18	322576	3.01297e+06	248136	133767	157024	1.2214e+06	1.68486e+06	6.78073e+06
2015-03-19	322798	3.01208e+06	248339	133752	157062	1.26706e+06	1.7526e+06	6.89369e+06
2015-03-20	323006	3.01121e+06	248531	133833	157100	1.31215e+06	1.81892e+06	7.00475e+06
2015-03-21	323195	3.0104e+06	248708	134063	157134	1.35762e+06	1.88285e+06	7.11398e+06
2015-03-22	323360	3.00968e+06	248864	134420	157166	1.40358e+06	1.94345e+06	7.22052e+06
2015-03-23	323497	3.00907e+06	248994	134883	157192	1.45012e+06	1.99976e+06	7.32351e+06
2015-03-24	323601	3.00859e+06	249094	135430	157212	1.49735e+06	2.05082e+06	7.4221e+06
2015-03-25	323667	3.00829e+06	249157	136042	157225	1.54537e+06	2.09567e+06	7.51543e+06
2015-03-26	323690	3.00818e+06	249179	136695	157230	1.59429e+06	2.13338e+06	7.60264e+06
2015-03-27	323596	3.00856e+06	249179	137370	157230	1.6442e+06	2.16657e+06	7.6867e+06
2015-03-28	323331	3.00961e+06	249179	138045	157230	1.69521e+06	2.19855e+06	7.77115e+06
2015-03-29	322920	3.01125e+06	249179	138699	157230	1.74742e+06	2.22937e+06	7.85607e+06
2015-03-30	322386	3.01338e+06	249179	139310	157230	1.80094e+06	2.25908e+06	7.94151e+06
2015-03-31	321755	3.0159e+06	249179	139858	157230	1.85586e+06	2.28774e+06	8.02752e+06
2015-04-01	321050	3.01871e+06	249179	140321	157230	1.91229e+06	2.31539e+06	8.11417e+06
2015-04-02	320297	3.02171e+06	249179	140678	157230	1.97033e+06	2.34208e+06	8.20151e+06
2015-04-03	319519	3.02482e+06	249179	140907	157230	2.03008e+06	2.36787e+06	8.2896e+06
2015-04-04	318741	3.02792e+06	249179	140988	157230	2.09166e+06	2.39279e+06	8.37851e+06
2015-04-05	317988	3.03093e+06	249179	140988	157230	2.1581e+06	2.41691e+06	8.47132e+06
2015-04-06	317283	3.03374e+06	249179	140988	157230	2.23163e+06	2.44028e+06	8.57033e+06
2015-04-07	316652	3.03625e+06	249179	140988	157230	2.31112e+06	2.46293e+06	8.67435e+06
2015-04-08	316118	3.03838e+06	249179	140988	157230	2.39539e+06	2.48493e+06	8.78222e+06
2015-04-09	315707	3.04002e+06	249179	140988	157230	2.48331e+06	2.50633e+06	8.89277e+06
2015-04-10	315442	3.04108e+06	249179	140988	157230	2.57374e+06	2.52716e+06	9.00482e+06
2015-04-11	315348	3.04145e+06	249179	140988	157230	2.6655e+06	2.54749e+06	9.11719e+06
2015-04-12	315348	3.04139e+06	249179	140988	157230	2.75747e+06	2.56737e+06	9.22897e+06
2015-04-13	315348	3.04121e+06	249179	140988	157230	2.84849e+06	2.58683e+06	9.33928e+06
2015-04-14	315348	3.04093e+06	249179	140988	157230	2.93741e+06	2.60594e+06	9.44703e+06
2015-04-15	315348	3.04057e+06	249179	140988	157230	3.02308e+06	2.62475e+06	9.55114e+06
2015-04-16	315348	3.04014e+06	249179	140988	157230	3.10435e+06	2.64329e+06	9.65053e+06
2015-04-17	315348	3.03966e+06	249179	140988	157230	3.18008e+06	2.66163e+06	9.74412e+06
2015-04-18	315348	3.03914e+06	249179	140988	157230	3.24912e+06	2.67982e+06	9.83083e+06
2015-04-19	315348	3.03862e+06	249179	140988	157230	3.3103e+06	2.6979e+06	9.90956e+06
2015-04-20	315348	3.03809e+06	249179	140988	157230	3.3625e+06	2.71592e+06	9.97925e+06
2015-04-21	315348	3.03757e+06	249179	140988	157230	3.40842e+06	2.73394e+06	1.00427e+07
2015-04-22	315348	3.0371e+06	249179	140988	157230	3.4517e+06	2.752e+06	1.01035e+07
2015-04-23	315348	3.03667e+06	249179	140988	157230	3.49255e+06	2.77016e+06	1.01621e+07
2015-04-24	315348	3.0363e+06	249179	140988	157230	3.53119e+06	2.78846e+06	1.02187e+07
2015-04-25	315348	3.03602e+06	249179	140988	157230	3.56785e+06	2.80695e+06	1.02736e+07
2015-04-26	315348	3.03584e+06	249179	140988	157230	3.60272e+06	2.82569e+06	1.0327e+07
2015-04-27	315348	3.03578e+06	249179	140988	157230	3.63604e+06	2.84473e+06	1.03793e+07
2015-04-28	315348	3.03642e+06	249212	140988	157230	3.66802e+06	2.86307e+06	1.04303e+07
2015-04-29	315348	3.03824e+06	249309	140988	157230	3.69887e+06	2.87992e+06	1.04799e+07
2015-04-30	315348	3.04107e+06	249464	140988	157230	3.72882e+06	2.89555e+06	1.05285e+07
2015-05-01	315348	3.04474e+06	249671	140988	157230	3.75807e+06	2.91027e+06	1.05763e+07
2015-05-02	315348	3.04907e+06	249927	140988	157230	3.78685e+06	2.92436e+06	1.06238e+07
2015-05-03	315348	3.05392e+06	250225	140988	157230	3.81538e+06	2.93811e+06	1.06712e+07
2015-05-04	315348	3.05909e+06	250560	140988	157230	3.84387e+06	2.95183e+06	1.07189e+07
2015-05-05	315348	3.06444e+06	250928	140988	157230	3.87253e+06	2.96579e+06	1.07673e+07
2015-05-06	315348	3.06979e+06	251324	140988	157230	3.90159e+06	2.9803e+06	1.08166e+07
2015-05-07	315348	3.07496e+06	251742		157230	3.92955e+06	2.99565e+06	NA
2015-05-08	315348	3.07981e+06	252176		157230	3.95506e+06	3.01213e+06	NA
2015-05-09	315348	3.08414e+06	252623		157230	3.97859e+06	3.03002e+06	NA
2015-05-10	315348	3.08781e+06	253077		157230	4.00061e+06	3.04963e+06	NA
2015-05-11	315348	3.09064e+06	253532		157230	4.02159e+06	3.07125e+06	NA
2015-05-12	315348	3.09246e+06	253984		157230	4.04199e+06	3.09517e+06	NA
2015-05-13	315348	3.0931e+06	254427		157230	4.06229e+06	3.12168e+06	NA
2015-05-14	315348	3.0931e+06				4.08294e+06	3.15857e+06	NA
2015-05-15	315348	3.0931e+06				4.10441e+06	3.21176e+06	NA
2015-05-16	315348	3.0931e+06				4.12718e+06	3.27876e+06	NA
2015-05-17	315348	3.0931e+06				4.15171e+06	3.35708e+06	NA
2015-05-18	315348	3.0931e+06				4.17847e+06	3.44422e+06	NA
2015-05-19	315348	3.0931e+06				4.20791e+06	3.5377e+06	NA
2015-05-20	315348	3.0931e+06				4.24052e+06	3.63502e+06	NA
2015-05-21	315348	3.0931e+06				4.27675e+06	3.73368e+06	NA
2015-05-22	315348	3.0931e+06				4.31708e+06	3.83119e+06	NA
2015-05-23	315348	3.0931e+06				4.37482e+06	3.92507e+06	NA
2015-05-24	315348	3.0931e+06				4.46019e+06	4.01281e+06	NA
2015-05-25	315348	3.0931e+06				4.56896e+06	4.09192e+06	NA
2015-05-26	315348	3.0931e+06				4.69693e+06	4.15991e+06	NA
2015-05-27	315348	3.0931e+06				4.83988e+06	4.2143e+06	NA
2015-05-28	315348	3.0931e+06				4.99359e+06	4.25257e+06	NA
2015-05-29	315348	3.0931e+06				5.15385e+06	4.27225e+06	NA
2015-05-30	315348	3.0931e+06				5.31645e+06	4.28165e+06	NA
2015-05-31	315348	3.0931e+06				5.47717e+06	4.29075e+06	NA
2015-06-01	315348	3.0931e+06				5.6318e+06	4.29957e+06	NA
2015-06-02	315348	3.0931e+06				5.77612e+06	4.30811e+06	NA
2015-06-03	315348	3.0931e+06				5.90592e+06	4.31637e+06	NA
2015-06-04	315348	3.0931e+06				6.01698e+06	4.32436e+06	NA
2015-06-05	315348	3.0931e+06				6.10509e+06	4.33208e+06	NA
2015-06-06	315348	3.0931e+06				6.16604e+06	4.33954e+06	NA
2015-06-07	315348	3.0931e+06				6.19561e+06	4.34674e+06	NA
2015-06-08	315348	3.0931e+06				6.20791e+06	4.35369e+06	NA
2015-06-09	315348	3.0931e+06				6.21988e+06	4.36039e+06	NA
2015-06-10	315348	3.0931e+06				6.2315e+06	4.36685e+06	NA
2015-06-11	315348	3.0931e+06				6.24278e+06	4.37307e+06	NA
2015-06-12	315348	3.0931e+06				6.25373e+06	4.37906e+06	NA
2015-06-13	315348	3.0931e+06				6.26436e+06	4.38482e+06	NA
2015-06-14	315348	3.0931e+06				6.27465e+06	4.39036e+06	NA
2015-06-15	315348	3.0931e+06				6.28463e+06	4.39568e+06	NA
2015-06-16	315348	3.0931e+06				6.29429e+06	4.40079e+06	NA
2015-06-17	315348	3.0931e+06				6.30363e+06	4.40568e+06	NA
2015-06-18	315348	3.0931e+06				6.31267e+06	4.41038e+06	NA
2015-06-19	315348	3.0931e+06				6.32139e+06	4.41488e+06	NA
2015-06-20	315348	3.0931e+06				6.32982e+06	4.41918e+06	NA
2015-06-21	315348	3.0931e+06				6.33794e+06	4.42329e+06	NA
2015-06-22	315348	3.0931e+06				6.34577e+06	4.42722e+06	NA
2015-06-23	315348	3.0931e+06				6.3533e+06	4.43097e+06	NA
2015-06-24	315348	3.0931e+06				6.36055e+06	4.43455e+06	NA
2015-06-25	315348	3.0931e+06				6.36751e+06	4.43796e+06	NA
2015-06-26	315348	3.0931e+06				6.37419e+06	4.4412e+06	NA
2015-06-27	315348	3.0931e+06				6.38059e+06	4.44429e+06	NA
2015-06-28	315348	3.0931e+06				6.38671e+06	4.44722e+06	NA
2015-06-29	315348	3.0931e+06				6.39257e+06	4.45e+06	NA
2015-06-30	315348	3.0931e+06				6.39816e+06	4.45264e+06	NA
2015-07-01	315348	3.0931e+06				6.40348e+06	4.45514e+06	NA
2015-07-02	315348	3.0931e+06				6.40854e+06	4.4575e+06	NA
2015-07-03	315348	3.0931e+06				6.41335e+06	4.45973e+06	NA
2015-07-04	315348	3.0931e+06				6.41791e+06	4.46184e+06	NA
2015-07-05	315348	3.0931e+06				6.42221e+06	4.46383e+06	NA
2015-07-06	315348	3.0931e+06				6.42628e+06	4.4657e+06	NA
2015-07-07	315348	3.0931e+06				6.4301e+06	4.46746e+06	NA
2015-07-08	315348	3.0931e+06				6.43368e+06	4.46912e+06	NA
2015-07-09	315348	3.0931e+06				6.43702e+06	4.47068e+06	NA
2015-07-10	315348	3.0931e+06				6.44014e+06	4.47214e+06	NA
2015-07-11	315348	3.0931e+06				6.44303e+06	4.47351e+06	NA
2015-07-12	315348	3.0931e+06				6.44569e+06	4.47479e+06	NA
2015-07-13	315348	3.0931e+06				6.44814e+06	4.476e+06	NA
2015-07-14	315348	3.0931e+06				6.45037e+06	4.47713e+06	NA
2015-07-15	315348	3.0931e+06				6.45238e+06	4.47819e+06	NA
2015-07-16	315348	3.0931e+06				6.45419e+06	4.47918e+06	NA
2015-07-17						6.45579e+06	4.48013e+06	NA
2015-07-18						6.45719e+06	4.48107e+06	NA
2015-07-19						6.45839e+06	4.48199e+06	NA
2015-07-20						6.45939e+06	4.48288e+06	NA
2015-07-21						6.46021e+06	4.48374e+06	NA
2015-07-22						6.46084e+06	4.48455e+06	NA
2015-07-23						6.46128e+06	4.48532e+06	NA
2015-07-24						6.46154e+06	4.48604e+06	NA
2015-07-25						6.46163e+06	4.48669e+06	NA
2015-07-26							4.48728e+06	NA
2015-07-27							4.4878e+06	NA
2015-07-28							4.48823e+06	NA
2015-07-29							4.48858e+06	NA
2015-07-30							4.48884e+06	NA
2015-07-31							4.489e+06	NA
2015-08-01							4.48906e+06	NA

## Sheet: InterpolatedReefArea
Interpolated Dates	Cuarteron Reef Area (m^2)	Fiery Cross Reef Area (m^2)	Gaven Reef Area (m^2)	Hughes Reef Area (m^2)	Johnson Reef Area (m^2)	Mischief Reef Area (m^2)	Subi Reef Area (m^2)	Total Reef Area (m^2)
2013-04-30				2.64838e+06		1.3485e+07		NA
2013-05-01				2.64838e+06		1.3485e+07		NA
2013-05-02				2.64838e+06		1.3485e+07		NA
2013-05-03				2.64838e+06		1.3485e+07		NA
2013-05-04				2.64838e+06		1.3485e+07		NA
2013-05-05				2.64838e+06		1.3485e+07		NA
2013-05-06				2.64838e+06		1.3485e+07		NA
2013-05-07				2.64838e+06		1.3485e+07		NA
2013-05-08				2.64838e+06		1.3485e+07		NA
2013-05-09				2.64838e+06		1.3485e+07		NA
2013-05-10				2.64838e+06		1.3485e+07		NA
2013-05-11				2.64838e+06		1.3485e+07		NA
2013-05-12				2.64838e+06		1.3485e+07		NA
2013-05-13				2.64838e+06		1.3485e+07		NA
2013-05-14				2.64838e+06		1.3485e+07		NA
2013-05-15				2.64838e+06		1.3485e+07		NA
2013-05-16				2.64838e+06		1.3485e+07		NA
2013-05-17				2.64838e+06		1.3485e+07		NA
2013-05-18				2.64838e+06		1.3485e+07		NA
2013-05-19				2.64838e+06		1.3485e+07		NA
2013-05-20				2.64838e+06		1.3485e+07		NA
2013-05-21				2.64838e+06		1.3485e+07		NA
2013-05-22				2.64838e+06		1.3485e+07		NA
2013-05-23			2.00863e+06	2.64838e+06	6.59384e+06	1.3485e+07	7.40574e+06	NA
2013-05-24			2.00863e+06	2.64838e+06	6.59384e+06	1.3485e+07	7.40574e+06	NA
2013-05-25			2.00863e+06	2.64838e+06	6.59383e+06	1.3485e+07	7.40574e+06	NA
2013-05-26			2.00863e+06	2.64838e+06	6.59382e+06	1.3485e+07	7.40574e+06	NA
2013-05-27			2.00863e+06	2.64838e+06	6.59381e+06	1.3485e+07	7.40574e+06	NA
2013-05-28			2.00863e+06	2.64838e+06	6.59379e+06	1.3485e+07	7.40575e+06	NA
2013-05-29			2.00863e+06	2.64838e+06	6.59377e+06	1.3485e+07	7.40576e+06	NA
2013-05-30			2.00863e+06	2.64838e+06	6.59375e+06	1.3485e+07	7.40576e+06	NA
2013-05-31			2.00863e+06	2.64838e+06	6.59372e+06	1.3485e+07	7.40577e+06	NA
2013-06-01			2.00863e+06	2.64838e+06	6.59369e+06	1.3485e+07	7.40578e+06	NA
2013-06-02			2.00863e+06	2.64838e+06	6.59366e+06	1.3485e+07	7.40579e+06	NA
2013-06-03			2.00863e+06	2.64837e+06	6.59362e+06	1.3485e+07	7.40581e+06	NA
2013-06-04			2.00863e+06	2.64837e+06	6.59358e+06	1.3485e+07	7.40582e+06	NA
2013-06-05			2.00863e+06	2.64837e+06	6.59354e+06	1.3485e+07	7.40583e+06	NA
2013-06-06			2.00863e+06	2.64837e+06	6.59349e+06	1.3485e+07	7.40585e+06	NA
2013-06-07			2.00863e+06	2.64837e+06	6.59344e+06	1.3485e+07	7.40587e+06	NA
2013-06-08			2.00863e+06	2.64837e+06	6.59338e+06	1.3485e+07	7.40588e+06	NA
2013-06-09			2.00863e+06	2.64837e+06	6.59332e+06	1.3485e+07	7.4059e+06	NA
2013-06-10			2.00863e+06	2.64837e+06	6.59326e+06	1.3485e+07	7.40592e+06	NA
2013-06-11			2.00863e+06	2.64837e+06	6.5932e+06	1.3485e+07	7.40595e+06	NA
2013-06-12			2.00863e+06	2.64837e+06	6.59313e+06	1.3485e+07	7.40597e+06	NA
2013-06-13			2.00863e+06	2.64837e+06	6.59306e+06	1.3485e+07	7.40599e+06	NA
2013-06-14			2.00863e+06	2.64837e+06	6.59298e+06	1.3485e+07	7.40602e+06	NA
2013-06-15			2.00863e+06	2.64837e+06	6.5929e+06	1.3485e+07	7.40604e+06	NA
2013-06-16			2.00863e+06	2.64837e+06	6.59282e+06	1.3485e+07	7.40607e+06	NA
2013-06-17			2.00863e+06	2.64837e+06	6.59273e+06	1.3485e+07	7.4061e+06	NA
2013-06-18			2.00863e+06	2.64837e+06	6.59264e+06	1.3485e+07	7.40613e+06	NA
2013-06-19			2.00863e+06	2.64836e+06	6.59255e+06	1.3485e+07	7.40616e+06	NA
2013-06-20			2.00863e+06	2.64836e+06	6.59246e+06	1.3485e+07	7.40619e+06	NA
2013-06-21			2.00863e+06	2.64836e+06	6.59236e+06	1.3485e+07	7.40622e+06	NA
2013-06-22			2.00863e+06	2.64836e+06	6.59225e+06	1.3485e+07	7.40625e+06	NA
2013-06-23			2.00863e+06	2.64836e+06	6.59215e+06	1.3485e+07	7.40629e+06	NA
2013-06-24			2.00863e+06	2.64836e+06	6.59204e+06	1.3485e+07	7.40632e+06	NA
2013-06-25			2.00863e+06	2.64836e+06	6.59193e+06	1.3485e+07	7.40636e+06	NA
2013-06-26			2.00863e+06	2.64836e+06	6.59181e+06	1.3485e+07	7.4064e+06	NA
2013-06-27			2.00863e+06	2.64836e+06	6.59169e+06	1.3485e+07	7.40644e+06	NA
2013-06-28			2.00863e+06	2.64836e+06	6.59157e+06	1.3485e+07	7.40648e+06	NA
2013-06-29			2.00863e+06	2.64836e+06	6.59145e+06	1.3485e+07	7.40652e+06	NA
2013-06-30			2.00863e+06	2.64835e+06	6.59132e+06	1.3485e+07	7.40656e+06	NA
2013-07-01			2.00863e+06	2.64835e+06	6.59118e+06	1.3485e+07	7.4066e+06	NA
2013-07-02			2.00863e+06	2.64835e+06	6.59105e+06	1.3485e+07	7.40665e+06	NA
2013-07-03			2.00863e+06	2.64835e+06	6.59091e+06	1.3485e+07	7.40669e+06	NA
2013-07-04			2.00863e+06	2.64835e+06	6.59077e+06	1.3485e+07	7.40674e+06	NA
2013-07-05			2.00863e+06	2.64835e+06	6.59063e+06	1.3485e+07	7.40678e+06	NA
2013-07-06			2.00863e+06	2.64835e+06	6.59048e+06	1.3485e+07	7.40683e+06	NA
2013-07-07			2.00863e+06	2.64835e+06	6.59033e+06	1.3485e+07	7.40688e+06	NA
2013-07-08			2.00863e+06	2.64835e+06	6.59017e+06	1.3485e+07	7.40693e+06	NA
2013-07-09			2.00863e+06	2.64834e+06	6.59001e+06	1.3485e+07	7.40698e+06	NA
2013-07-10			2.00863e+06	2.64834e+06	6.58985e+06	1.3485e+07	7.40703e+06	NA
2013-07-11			2.00863e+06	2.64834e+06	6.58969e+06	1.3485e+07	7.40709e+06	NA
2013-07-12			2.00863e+06	2.64834e+06	6.58952e+06	1.3485e+07	7.40714e+06	NA
2013-07-13			2.00863e+06	2.64834e+06	6.58935e+06	1.3485e+07	7.4072e+06	NA
2013-07-14			2.00863e+06	2.64834e+06	6.58918e+06	1.3485e+07	7.40725e+06	NA
2013-07-15			2.00863e+06	2.64834e+06	6.58901e+06	1.3485e+07	7.40731e+06	NA
2013-07-16			2.00863e+06	2.64833e+06	6.58883e+06	1.3485e+07	7.40737e+06	NA
2013-07-17			2.00863e+06	2.64833e+06	6.58864e+06	1.3485e+07	7.40743e+06	NA
2013-07-18			2.00863e+06	2.64833e+06	6.58846e+06	1.3485e+07	7.40749e+06	NA
2013-07-19			2.00863e+06	2.64833e+06	6.58827e+06	1.3485e+07	7.40755e+06	NA
2013-07-20			2.00863e+06	2.64833e+06	6.58808e+06	1.3485e+07	7.40761e+06	NA
2013-07-21			2.00863e+06	2.64833e+06	6.58789e+06	1.3485e+07	7.40767e+06	NA
2013-07-22			2.00863e+06	2.64833e+06	6.58769e+06	1.3485e+07	7.40773e+06	NA
2013-07-23			2.00863e+06	2.64832e+06	6.58749e+06	1.3485e+07	7.4078e+06	NA
2013-07-24			2.00863e+06	2.64832e+06	6.58729e+06	1.3485e+07	7.40786e+06	NA
2013-07-25			2.00863e+06	2.64832e+06	6.58708e+06	1.3485e+07	7.40793e+06	NA
2013-07-26			2.00863e+06	2.64832e+06	6.58687e+06	1.3485e+07	7.408e+06	NA
2013-07-27			2.00863e+06	2.64832e+06	6.58666e+06	1.3485e+07	7.40807e+06	NA
2013-07-28			2.00863e+06	2.64831e+06	6.58644e+06	1.3485e+07	7.40814e+06	NA
2013-07-29			2.00863e+06	2.64831e+06	6.58623e+06	1.3485e+07	7.40821e+06	NA
2013-07-30			2.00863e+06	2.64831e+06	6.58601e+06	1.3485e+07	7.40828e+06	NA
2013-07-31			2.00863e+06	2.64831e+06	6.58578e+06	1.3485e+07	7.40835e+06	NA
2013-08-01			2.00863e+06	2.64831e+06	6.58556e+06	1.3485e+07	7.40842e+06	NA
2013-08-02			2.00863e+06	2.6483e+06	6.58533e+06	1.3485e+07	7.4085e+06	NA
2013-08-03			2.00863e+06	2.6483e+06	6.58509e+06	1.3485e+07	7.40857e+06	NA
2013-08-04			2.00863e+06	2.6483e+06	6.58486e+06	1.3485e+07	7.40865e+06	NA
2013-08-05			2.00863e+06	2.6483e+06	6.58462e+06	1.3485e+07	7.40872e+06	NA
2013-08-06			2.00863e+06	2.6483e+06	6.58438e+06	1.3485e+07	7.4088e+06	NA
2013-08-07			2.00863e+06	2.64829e+06	6.58414e+06	1.3485e+07	7.40888e+06	NA
2013-08-08			2.00863e+06	2.64829e+06	6.58389e+06	1.3485e+07	7.40896e+06	NA
2013-08-09			2.00863e+06	2.64829e+06	6.58364e+06	1.3485e+07	7.40904e+06	NA
2013-08-10			2.00863e+06	2.64829e+06	6.58339e+06	1.3485e+07	7.40912e+06	NA
2013-08-11			2.00863e+06	2.64829e+06	6.58313e+06	1.3485e+07	7.4092e+06	NA
2013-08-12			2.00863e+06	2.64828e+06	6.58288e+06	1.3485e+07	7.40928e+06	NA
2013-08-13			2.00863e+06	2.64828e+06	6.58261e+06	1.3485e+07	7.40937e+06	NA
2013-08-14			2.00863e+06	2.64828e+06	6.58235e+06	1.3485e+07	7.40945e+06	NA
2013-08-15			2.00863e+06	2.64828e+06	6.58209e+06	1.3485e+07	7.40954e+06	NA
2013-08-16			2.00863e+06	2.64827e+06	6.58182e+06	1.3485e+07	7.40962e+06	NA
2013-08-17			2.00863e+06	2.64827e+06	6.58155e+06	1.3485e+07	7.40971e+06	NA
2013-08-18			2.00863e+06	2.64827e+06	6.58127e+06	1.3485e+07	7.4098e+06	NA
2013-08-19			2.00863e+06	2.64827e+06	6.58099e+06	1.3485e+07	7.40989e+06	NA
2013-08-20			2.00863e+06	2.64826e+06	6.58072e+06	1.3485e+07	7.40998e+06	NA
2013-08-21			2.00863e+06	2.64826e+06	6.58043e+06	1.3485e+07	7.41007e+06	NA
2013-08-22			2.00863e+06	2.64826e+06	6.58015e+06	1.3485e+07	7.41016e+06	NA
2013-08-23			2.00863e+06	2.64826e+06	6.57986e+06	1.3485e+07	7.41025e+06	NA
2013-08-24			2.00863e+06	2.64825e+06	6.57957e+06	1.3485e+07	7.41034e+06	NA
2013-08-25			2.00863e+06	2.64825e+06	6.57928e+06	1.3485e+07	7.41044e+06	NA
2013-08-26			2.00863e+06	2.64825e+06	6.57898e+06	1.3485e+07	7.41053e+06	NA
2013-08-27			2.00863e+06	2.64824e+06	6.57868e+06	1.3485e+07	7.41063e+06	NA
2013-08-28			2.00863e+06	2.64824e+06	6.57838e+06	1.3485e+07	7.41072e+06	NA
2013-08-29			2.00863e+06	2.64824e+06	6.57808e+06	1.3485e+07	7.41082e+06	NA
2013-08-30			2.00863e+06	2.64823e+06	6.57777e+06	1.3485e+07	7.41092e+06	NA
2013-08-31			2.00863e+06	2.64823e+06	6.57747e+06	1.3485e+07	7.41102e+06	NA
2013-09-01			2.00863e+06	2.64823e+06	6.57715e+06	1.3485e+07	7.41111e+06	NA
2013-09-02			2.00863e+06	2.64823e+06	6.57684e+06	1.3485e+07	7.41121e+06	NA
2013-09-03			2.00863e+06	2.64822e+06	6.57653e+06	1.3485e+07	7.41132e+06	NA
2013-09-04			2.00863e+06	2.64822e+06	6.57621e+06	1.3485e+07	7.41142e+06	NA
2013-09-05			2.00863e+06	2.64822e+06	6.57589e+06	1.3485e+07	7.41152e+06	NA
2013-09-06			2.00863e+06	2.64821e+06	6.57556e+06	1.3485e+07	7.41162e+06	NA
2013-09-07			2.00863e+06	2.64821e+06	6.57524e+06	1.3485e+07	7.41173e+06	NA
2013-09-08			2.00863e+06	2.64821e+06	6.57491e+06	1.3485e+07	7.41183e+06	NA
2013-09-09			2.00863e+06	2.6482e+06	6.57458e+06	1.3485e+07	7.41194e+06	NA
2013-09-10			2.00863e+06	2.6482e+06	6.57424e+06	1.3485e+07	7.41204e+06	NA
2013-09-11			2.00863e+06	2.6482e+06	6.57391e+06	1.3485e+07	7.41215e+06	NA
2013-09-12			2.00863e+06	2.64819e+06	6.57357e+06	1.3485e+07	7.41226e+06	NA
2013-09-13			2.00863e+06	2.64819e+06	6.57323e+06	1.3485e+07	7.41236e+06	NA
2013-09-14			2.00863e+06	2.64818e+06	6.57288e+06	1.3485e+07	7.41247e+06	NA
2013-09-15			2.00863e+06	2.64818e+06	6.57254e+06	1.3485e+07	7.41258e+06	NA
2013-09-16			2.00863e+06	2.64818e+06	6.57219e+06	1.3485e+07	7.41269e+06	NA
2013-09-17			2.00863e+06	2.64817e+06	6.57184e+06	1.3485e+07	7.41281e+06	NA
2013-09-18			2.00863e+06	2.64817e+06	6.57149e+06	1.3485e+07	7.41292e+06	NA
2013-09-19			2.00863e+06	2.64817e+06	6.57113e+06	1.3485e+07	7.41303e+06	NA
2013-09-20			2.00863e+06	2.64816e+06	6.57077e+06	1.3485e+07	7.41314e+06	NA
2013-09-21			2.00863e+06	2.64816e+06	6.57041e+06	1.3485e+07	7.41326e+06	NA
2013-09-22			2.00863e+06	2.64815e+06	6.57005e+06	1.3485e+07	7.41337e+06	NA
2013-09-23			2.00863e+06	2.64815e+06	6.56969e+06	1.3485e+07	7.41349e+06	NA
2013-09-24			2.00863e+06	2.64815e+06	6.56932e+06	1.3485e+07	7.4136e+06	NA
2013-09-25			2.00863e+06	2.64814e+06	6.56895e+06	1.3485e+07	7.41372e+06	NA
2013-09-26			2.00863e+06	2.64814e+06	6.56858e+06	1.3485e+07	7.41384e+06	NA
2013-09-27			2.00863e+06	2.64813e+06	6.5682e+06	1.3485e+07	7.41396e+06	NA
2013-09-28			2.00863e+06	2.64813e+06	6.56783e+06	1.3485e+07	7.41407e+06	NA
2013-09-29			2.00863e+06	2.64813e+06	6.56745e+06	1.3485e+07	7.41419e+06	NA
2013-09-30			2.00863e+06	2.64812e+06	6.56707e+06	1.3485e+07	7.41431e+06	NA
2013-10-01			2.00863e+06	2.64812e+06	6.56669e+06	1.3485e+07	7.41443e+06	NA
2013-10-02			2.00863e+06	2.64811e+06	6.5663e+06	1.3485e+07	7.41456e+06	NA
2013-10-03			2.00863e+06	2.64811e+06	6.56591e+06	1.3485e+07	7.41468e+06	NA
2013-10-04			2.00863e+06	2.6481e+06	6.56552e+06	1.3485e+07	7.4148e+06	NA
2013-10-05			2.00863e+06	2.6481e+06	6.56513e+06	1.3485e+07	7.41492e+06	NA
2013-10-06			2.00863e+06	2.64809e+06	6.56474e+06	1.3485e+07	7.41505e+06	NA
2013-10-07			2.00863e+06	2.64809e+06	6.56434e+06	1.3485e+07	7.41517e+06	NA
2013-10-08			2.00863e+06	2.64808e+06	6.56394e+06	1.3485e+07	7.4153e+06	NA
2013-10-09			2.00863e+06	2.64808e+06	6.56354e+06	1.3485e+07	7.41542e+06	NA
2013-10-10			2.00863e+06	2.64807e+06	6.56314e+06	1.3485e+07	7.41555e+06	NA
2013-10-11			2.00863e+06	2.64807e+06	6.56273e+06	1.3485e+07	7.41568e+06	NA
2013-10-12			2.00863e+06	2.64806e+06	6.56233e+06	1.3485e+07	7.41581e+06	NA
2013-10-13			2.00863e+06	2.64806e+06	6.56192e+06	1.3485e+07	7.41593e+06	NA
2013-10-14			2.00863e+06	2.64805e+06	6.56151e+06	1.3485e+07	7.41606e+06	NA
2013-10-15			2.00863e+06	2.64805e+06	6.56109e+06	1.3485e+07	7.41619e+06	NA
2013-10-16			2.00863e+06	2.64804e+06	6.56068e+06	1.3485e+07	7.41632e+06	NA
2013-10-17			2.00863e+06	2.64804e+06	6.56026e+06	1.3485e+07	7.41645e+06	NA
2013-10-18			2.00863e+06	2.64803e+06	6.55984e+06	1.3485e+07	7.41659e+06	NA
2013-10-19			2.00863e+06	2.64803e+06	6.55942e+06	1.3485e+07	7.41672e+06	NA
2013-10-20			2.00863e+06	2.64802e+06	6.559e+06	1.3485e+07	7.41685e+06	NA
2013-10-21			2.00863e+06	2.64802e+06	6.55857e+06	1.3485e+07	7.41698e+06	NA
2013-10-22			2.00863e+06	2.64801e+06	6.55814e+06	1.3485e+07	7.41712e+06	NA
2013-10-23			2.00863e+06	2.64801e+06	6.55771e+06	1.3485e+07	7.41725e+06	NA
2013-10-24			2.00863e+06	2.648e+06	6.55728e+06	1.3485e+07	7.41739e+06	NA
2013-10-25			2.00863e+06	2.648e+06	6.55685e+06	1.3485e+07	7.41752e+06	NA
2013-10-26			2.00863e+06	2.64799e+06	6.55641e+06	1.3485e+07	7.41766e+06	NA
2013-10-27			2.00863e+06	2.64798e+06	6.55598e+06	1.3485e+07	7.41779e+06	NA
2013-10-28			2.00863e+06	2.64798e+06	6.55554e+06	1.3485e+07	7.41793e+06	NA
2013-10-29			2.00863e+06	2.64797e+06	6.5551e+06	1.3485e+07	7.41807e+06	NA
2013-10-30			2.00863e+06	2.64797e+06	6.55465e+06	1.3485e+07	7.41821e+06	NA
2013-10-31			2.00863e+06	2.64796e+06	6.55421e+06	1.3485e+07	7.41835e+06	NA
2013-11-01			2.00863e+06	2.64796e+06	6.55376e+06	1.3485e+07	7.41849e+06	NA
2013-11-02			2.00863e+06	2.64795e+06	6.55331e+06	1.3485e+07	7.41863e+06	NA
2013-11-03			2.00863e+06	2.64794e+06	6.55286e+06	1.3485e+07	7.41877e+06	NA
2013-11-04			2.00863e+06	2.64794e+06	6.55241e+06	1.3485e+07	7.41891e+06	NA
2013-11-05			2.00863e+06	2.64793e+06	6.55195e+06	1.3485e+07	7.41905e+06	NA
2013-11-06			2.00863e+06	2.64792e+06	6.55149e+06	1.3485e+07	7.41919e+06	NA
2013-11-07			2.00863e+06	2.64792e+06	6.55104e+06	1.3485e+07	7.41933e+06	NA
2013-11-08			2.00863e+06	2.64791e+06	6.55058e+06	1.3485e+07	7.41948e+06	NA
2013-11-09			2.00863e+06	2.64791e+06	6.55011e+06	1.3485e+07	7.41962e+06	NA
2013-11-10			2.00863e+06	2.6479e+06	6.54965e+06	1.3485e+07	7.41976e+06	NA
2013-11-11			2.00863e+06	2.64789e+06	6.54918e+06	1.3485e+07	7.41991e+06	NA
2013-11-12			2.00863e+06	2.64789e+06	6.54872e+06	1.3485e+07	7.42005e+06	NA
2013-11-13			2.00863e+06	2.64788e+06	6.54825e+06	1.3485e+07	7.4202e+06	NA
2013-11-14			2.00863e+06	2.64787e+06	6.54778e+06	1.3485e+07	7.42034e+06	NA
2013-11-15			2.00863e+06	2.64787e+06	6.5473e+06	1.3485e+07	7.42049e+06	NA
2013-11-16			2.00863e+06	2.64786e+06	6.54683e+06	1.3485e+07	7.42064e+06	NA
2013-11-17			2.00863e+06	2.64785e+06	6.54635e+06	1.3485e+07	7.42078e+06	NA
2013-11-18			2.00863e+06	2.64784e+06	6.54587e+06	1.3485e+07	7.42093e+06	NA
2013-11-19			2.00863e+06	2.64784e+06	6.54539e+06	1.3485e+07	7.42108e+06	NA
2013-11-20			2.00863e+06	2.64783e+06	6.54491e+06	1.3485e+07	7.42123e+06	NA
2013-11-21			2.00863e+06	2.64782e+06	6.54443e+06	1.3485e+07	7.42138e+06	NA
2013-11-22			2.00863e+06	2.64782e+06	6.54394e+06	1.3485e+07	7.42153e+06	NA
2013-11-23			2.00863e+06	2.64781e+06	6.54346e+06	1.3485e+07	7.42168e+06	NA
2013-11-24			2.00863e+06	2.6478e+06	6.54297e+06	1.3485e+07	7.42183e+06	NA
2013-11-25			2.00863e+06	2.64779e+06	6.54248e+06	1.3485e+07	7.42198e+06	NA
2013-11-26			2.00863e+06	2.64779e+06	6.54199e+06	1.3485e+07	7.42213e+06	NA
2013-11-27			2.00863e+06	2.64778e+06	6.54149e+06	1.3485e+07	7.42228e+06	NA
2013-11-28			2.00863e+06	2.64777e+06	6.541e+06	1.3485e+07	7.42243e+06	NA
2013-11-29			2.00863e+06	2.64776e+06	6.5405e+06	1.3485e+07	7.42259e+06	NA
2013-11-30			2.00863e+06	2.64776e+06	6.54001e+06	1.3485e+07	7.42274e+06	NA
2013-12-01			2.00863e+06	2.64775e+06	6.53951e+06	1.3485e+07	7.42289e+06	NA
2013-12-02			2.00863e+06	2.64774e+06	6.539e+06	1.3485e+07	7.42305e+06	NA
2013-12-03			2.00863e+06	2.64773e+06	6.5385e+06	1.3485e+07	7.4232e+06	NA
2013-12-04			2.00863e+06	2.64772e+06	6.538e+06	1.3485e+07	7.42336e+06	NA
2013-12-05			2.00863e+06	2.64772e+06	6.53749e+06	1.3485e+07	7.42351e+06	NA
2013-12-06			2.00863e+06	2.64771e+06	6.53698e+06	1.3485e+07	7.42367e+06	NA
2013-12-07			2.00863e+06	2.6477e+06	6.53647e+06	1.3485e+07	7.42382e+06	NA
2013-12-08			2.00863e+06	2.64769e+06	6.53596e+06	1.3485e+07	7.42398e+06	NA
2013-12-09			2.00863e+06	2.64768e+06	6.53545e+06	1.3485e+07	7.42413e+06	NA
2013-12-10			2.00863e+06	2.64768e+06	6.53494e+06	1.3485e+07	7.42429e+06	NA
2013-12-11			2.00863e+06	2.64767e+06	6.53442e+06	1.3485e+07	7.42445e+06	NA
2013-12-12			2.00863e+06	2.64766e+06	6.53391e+06	1.3485e+07	7.42461e+06	NA
2013-12-13			2.00863e+06	2.64765e+06	6.53339e+06	1.3485e+07	7.42476e+06	NA
2013-12-14			2.00863e+06	2.64764e+06	6.53287e+06	1.3485e+07	7.42492e+06	NA
2013-12-15			2.00863e+06	2.64763e+06	6.53235e+06	1.3485e+07	7.42508e+06	NA
2013-12-16			2.00863e+06	2.64762e+06	6.53183e+06	1.3485e+07	7.42524e+06	NA
2013-12-17			2.00863e+06	2.64762e+06	6.5313e+06	1.3485e+07	7.4254e+06	NA
2013-12-18			2.00863e+06	2.64761e+06	6.53078e+06	1.3485e+07	7.42556e+06	NA
2013-12-19			2.00863e+06	2.6476e+06	6.53025e+06	1.3485e+07	7.42572e+06	NA
2013-12-20			2.00863e+06	2.64759e+06	6.52972e+06	1.3485e+07	7.42588e+06	NA
2013-12-21			2.00863e+06	2.64758e+06	6.52919e+06	1.3485e+07	7.42604e+06	NA
2013-12-22			2.00863e+06	2.64757e+06	6.52866e+06	1.3485e+07	7.4262e+06	NA
2013-12-23			2.00863e+06	2.64756e+06	6.52813e+06	1.3485e+07	7.42636e+06	NA
2013-12-24			2.00863e+06	2.64755e+06	6.5276e+06	1.3485e+07	7.42653e+06	NA
2013-12-25			2.00863e+06	2.64754e+06	6.52706e+06	1.3485e+07	7.42669e+06	NA
2013-12-26			2.00863e+06	2.64753e+06	6.52653e+06	1.3485e+07	7.42685e+06	NA
2013-12-27			2.00863e+06	2.64752e+06	6.52599e+06	1.3485e+07	7.42701e+06	NA
2013-12-28			2.00863e+06	2.64751e+06	6.52545e+06	1.3485e+07	7.42718e+06	NA
2013-12-29			2.00863e+06	2.6475e+06	6.52491e+06	1.3485e+07	7.42734e+06	NA
2013-12-30			2.00863e+06	2.6475e+06	6.52437e+06	1.3485e+07	7.4275e+06	NA
2013-12-31			2.00863e+06	2.64749e+06	6.52383e+06	1.3485e+07	7.42767e+06	NA
2014-01-01			2.00863e+06	2.64748e+06	6.52328e+06	1.3485e+07	7.42783e+06	NA
2014-01-02			2.00863e+06	2.64747e+06	6.52274e+06	1.3485e+07	7.428e+06	NA
2014-01-03			2.00863e+06	2.64746e+06	6.52219e+06	1.3485e+07	7.42816e+06	NA
2014-01-04			2.00863e+06	2.64745e+06	6.52164e+06	1.3485e+07	7.42832e+06	NA
2014-01-05			2.00863e+06	2.64744e+06	6.5211e+06	1.3485e+07	7.42849e+06	NA
2014-01-06			2.00863e+06	2.64743e+06	6.52055e+06	1.3485e+07	7.42866e+06	NA
2014-01-07			2.00863e+06	2.64742e+06	6.51999e+06	1.3485e+07	7.42882e+06	NA
2014-01-08			2.00863e+06	2.64741e+06	6.51944e+06	1.3485e+07	7.42899e+06	NA
2014-01-09			2.00863e+06	2.64739e+06	6.51889e+06	1.3485e+07	7.42915e+06	NA
2014-01-10			2.00863e+06	2.64738e+06	6.51833e+06	1.3485e+07	7.42932e+06	NA
2014-01-11			2.00863e+06	2.64737e+06	6.51778e+06	1.3485e+07	7.42949e+06	NA
2014-01-12			2.00863e+06	2.64736e+06	6.51722e+06	1.3485e+07	7.42965e+06	NA
2014-01-13			2.00863e+06	2.64735e+06	6.51666e+06	1.3485e+07	7.42982e+06	NA
2014-01-14			2.00863e+06	2.64734e+06	6.5161e+06	1.3485e+07	7.42999e+06	NA
2014-01-15			2.00863e+06	2.64733e+06	6.51554e+06	1.3485e+07	7.43016e+06	NA
2014-01-16			2.00863e+06	2.64732e+06	6.51498e+06	1.3485e+07	7.43032e+06	NA
2014-01-17			2.00863e+06	2.64731e+06	6.51442e+06	1.3485e+07	7.43049e+06	NA
2014-01-18			2.00863e+06	2.6473e+06	6.51386e+06	1.3485e+07	7.43066e+06	NA
2014-01-19			2.00863e+06	2.64729e+06	6.51329e+06	1.3485e+07	7.43083e+06	NA
2014-01-20			2.00863e+06	2.64728e+06	6.51273e+06	1.3485e+07	7.431e+06	NA
2014-01-21			2.00863e+06	2.64726e+06	6.51216e+06	1.3485e+07	7.43117e+06	NA
2014-01-22			2.00863e+06	2.64725e+06	6.51159e+06	1.3485e+07	7.43134e+06	NA
2014-01-23			2.00863e+06	2.64724e+06	6.51102e+06	1.3485e+07	7.43151e+06	NA
2014-01-24			2.00863e+06	2.64723e+06	6.51045e+06	1.3485e+07	7.43168e+06	NA
2014-01-25			2.00863e+06	2.64722e+06	6.50988e+06	1.3485e+07	7.43185e+06	NA
2014-01-26			2.00863e+06	2.64721e+06	6.50931e+06	1.3485e+07	7.43202e+06	NA
2014-01-27			2.00863e+06	2.6472e+06	6.50874e+06	1.3485e+07	7.43219e+06	NA
2014-01-28			2.00863e+06	2.64718e+06	6.50816e+06	1.3485e+07	7.43236e+06	NA
2014-01-29			2.00863e+06	2.64717e+06	6.50759e+06	1.3485e+07	7.43253e+06	NA
2014-01-30			2.00863e+06	2.64716e+06	6.50701e+06	1.3485e+07	7.4327e+06	NA
2014-01-31			2.00863e+06	2.64715e+06	6.50643e+06	1.3485e+07	7.43287e+06	NA
2014-02-01			2.00863e+06	2.64714e+06	6.50586e+06	1.3485e+07	7.43304e+06	NA
2014-02-02			2.00863e+06	2.64712e+06	6.50528e+06	1.3485e+07	7.43321e+06	NA
2014-02-03	6.02133e+06		2.00863e+06	2.64711e+06	6.5047e+06	1.3485e+07	7.43338e+06	NA
2014-02-04	6.02131e+06		2.00863e+06	2.6471e+06	6.50411e+06	1.3485e+07	7.43355e+06	NA
2014-02-05	6.02127e+06	5.01802e+06	2.00863e+06	2.64709e+06	6.5035e+06	1.3485e+07	7.43372e+06	4.31172e+07
2014-02-06	6.02119e+06	5.01668e+06	2.00863e+06	2.64707e+06	6.50286e+06	1.3485e+07	7.4339e+06	4.31153e+07
2014-02-07	6.02108e+06	5.01534e+06	2.00863e+06	2.64706e+06	6.50219e+06	1.3485e+07	7.43407e+06	4.31133e+07
2014-02-08	6.02094e+06	5.01403e+06	2.00863e+06	2.64705e+06	6.50149e+06	1.3485e+07	7.43424e+06	4.31113e+07
2014-02-09	6.02078e+06	5.01273e+06	2.00863e+06	2.64704e+06	6.50075e+06	1.3485e+07	7.43441e+06	4.31093e+07
2014-02-10	6.02058e+06	5.01144e+06	2.00863e+06	2.64702e+06	6.49996e+06	1.3485e+07	7.43458e+06	4.31072e+07
2014-02-11	6.02035e+06	5.01017e+06	2.00863e+06	2.64701e+06	6.49912e+06	1.3485e+07	7.43476e+06	4.3105e+07
2014-02-12	6.02009e+06	5.00892e+06	2.00863e+06	2.647e+06	6.49823e+06	1.3485e+07	7.43493e+06	4.31028e+07
2014-02-13	6.01981e+06	5.00768e+06	2.00863e+06	2.64698e+06	6.49728e+06	1.3485e+07	7.4351e+06	4.31005e+07
2014-02-14	6.01949e+06	5.00646e+06	2.00863e+06	2.64697e+06	6.49627e+06	1.3485e+07	7.43527e+06	4.30981e+07
2014-02-15	6.01915e+06	5.00525e+06	2.00863e+06	2.64696e+06	6.4952e+06	1.3485e+07	7.43545e+06	4.30956e+07
2014-02-16	6.01877e+06	5.00406e+06	2.00863e+06	2.64694e+06	6.49405e+06	1.3485e+07	7.43562e+06	4.3093e+07
2014-02-17	6.01837e+06	5.00289e+06	2.00863e+06	2.64693e+06	6.49283e+06	1.3485e+07	7.43579e+06	4.30904e+07
2014-02-18	6.01795e+06	5.00173e+06	2.00863e+06	2.64692e+06	6.49152e+06	1.3485e+07	7.43597e+06	4.30877e+07
2014-02-19	6.01749e+06	5.0006e+06	2.00863e+06	2.6469e+06	6.49013e+06	1.3485e+07	7.43614e+06	4.30849e+07
2014-02-20	6.017e+06	4.99948e+06	2.00863e+06	2.64689e+06	6.48827e+06	1.3485e+07	7.43631e+06	4.30816e+07
2014-02-21	6.01649e+06	4.99837e+06	2.00863e+06	2.64688e+06	6.48563e+06	1.3485e+07	7.43649e+06	4.30775e+07
2014-02-22	6.01595e+06	4.99729e+06	2.00863e+06	2.64686e+06	6.48233e+06	1.3485e+07	7.43666e+06	4.30727e+07
2014-02-23	6.01539e+06	4.99623e+06	2.00863e+06	2.64685e+06	6.4785e+06	1.3485e+07	7.43683e+06	4.30674e+07
2014-02-24	6.0148e+06	4.99518e+06	2.00863e+06	2.64683e+06	6.47427e+06	1.3485e+07	7.43701e+06	4.30617e+07
2014-02-25	6.01418e+06	4.99415e+06	2.00863e+06	2.64682e+06	6.46975e+06	1.3485e+07	7.43718e+06	4.30557e+07
2014-02-26	6.01353e+06	4.99314e+06	2.00863e+06	2.64681e+06	6.46508e+06	1.3485e+07	7.43735e+06	4.30495e+07
2014-02-27	6.01286e+06	4.99216e+06	2.00863e+06	2.64679e+06	6.46037e+06	1.3485e+07	7.43753e+06	4.30433e+07
2014-02-28	6.01217e+06	4.99119e+06	2.00863e+06	2.64678e+06	6.45575e+06	1.3485e+07	7.4377e+06	4.30372e+07
2014-03-01	6.01144e+06	4.99024e+06	2.00863e+06	2.6467e+06	6.45134e+06	1.3485e+07	7.43787e+06	4.30312e+07
2014-03-02	6.0107e+06	4.98931e+06	2.00863e+06	2.64651e+06	6.44727e+06	1.3485e+07	7.43805e+06	4.30254e+07
2014-03-03	6.00992e+06	4.9884e+06	2.00863e+06	2.64621e+06	6.44367e+06	1.3485e+07	7.43822e+06	4.302e+07
2014-03-04	6.00913e+06	4.98751e+06	2.00863e+06	2.64579e+06	6.44065e+06	1.3485e+07	7.4384e+06	4.30151e+07
2014-03-05	6.0083e+06	4.98664e+06	2.00863e+06	2.64527e+06	6.43833e+06	1.3485e+07	7.43857e+06	4.30107e+07
2014-03-06	6.00746e+06	4.9858e+06	2.00863e+06	2.64465e+06	6.43686e+06	1.3485e+07	7.43874e+06	4.30071e+07
2014-03-07	6.00659e+06	4.98497e+06	2.00863e+06	2.64394e+06	6.43634e+06	1.3485e+07	7.43892e+06	4.30044e+07
2014-03-08	6.00569e+06	4.98417e+06	2.00863e+06	2.64313e+06	6.43634e+06	1.3485e+07	7.43909e+06	4.3002e+07
2014-03-09	6.00477e+06	4.98339e+06	2.00863e+06	2.64224e+06	6.43637e+06	1.3485e+07	7.43927e+06	4.29996e+07
2014-03-10	6.00383e+06	4.98263e+06	2.00863e+06	2.64126e+06	6.4364e+06	1.3485e+07	7.43946e+06	4.29972e+07
2014-03-11	6.00287e+06	4.98189e+06	2.00863e+06	2.6402e+06	6.43645e+06	1.3485e+07	7.43965e+06	4.29947e+07
2014-03-12	6.00188e+06	4.98118e+06	2.00863e+06	2.63906e+06	6.43651e+06	1.3485e+07	7.43984e+06	4.29921e+07
2014-03-13	6.00087e+06	4.98048e+06	2.00863e+06	2.63786e+06	6.43658e+06	1.3485e+07	7.44004e+06	4.29894e+07
2014-03-14	5.99984e+06	4.97982e+06	2.00863e+06	2.63658e+06	6.43666e+06	1.3485e+07	7.44024e+06	4.29867e+07
2014-03-15	5.99878e+06	4.97917e+06	2.00863e+06	2.63525e+06	6.43675e+06	1.3485e+07	7.44045e+06	4.2984e+07
2014-03-16	5.9977e+06	4.97855e+06	2.00863e+06	2.63385e+06	6.43684e+06	1.3485e+07	7.44066e+06	4.29812e+07
2014-03-17	5.9966e+06	4.97795e+06	2.00863e+06	2.6324e+06	6.43695e+06	1.3485e+07	7.44088e+06	4.29784e+07
2014-03-18	5.99548e+06	4.97738e+06	2.00863e+06	2.63091e+06	6.43705e+06	1.3485e+07	7.4411e+06	4.29755e+07
2014-03-19	5.99434e+06	4.97683e+06	2.00863e+06	2.62936e+06	6.43717e+06	1.3485e+07	7.44132e+06	4.29726e+07
2014-03-20	5.99318e+06	4.9763e+06	2.00863e+06	2.62777e+06	6.43728e+06	1.3485e+07	7.44155e+06	4.29697e+07
2014-03-21	5.99199e+06	4.9758e+06	2.00863e+06	2.62615e+06	6.4374e+06	1.3485e+07	7.44179e+06	4.29667e+07
2014-03-22	5.99079e+06	4.97532e+06	2.00863e+06	2.62449e+06	6.43753e+06	1.3485e+07	7.44203e+06	4.29638e+07
2014-03-23	5.98956e+06	4.97487e+06	2.00863e+06	2.6228e+06	6.43765e+06	1.3485e+07	7.44227e+06	4.29608e+07
2014-03-24	5.98831e+06	4.97445e+06	2.00863e+06	2.62109e+06	6.43777e+06	1.3485e+07	7.44252e+06	4.29577e+07
2014-03-25	5.98705e+06	4.97405e+06	2.00863e+06	2.61936e+06	6.43789e+06	1.3485e+07	7.44277e+06	4.29547e+07
2014-03-26	5.98576e+06	4.97367e+06	2.00863e+06	2.61761e+06	6.43801e+06	1.3485e+07	7.44303e+06	4.29517e+07
2014-03-27	5.98445e+06	4.97333e+06	2.00863e+06	2.61585e+06	6.43813e+06	1.3485e+07	7.44329e+06	4.29486e+07
2014-03-28	5.98313e+06	4.97301e+06	2.00863e+06	2.61407e+06	6.43824e+06	1.3485e+07	7.44356e+06	4.29456e+07
2014-03-29	5.98179e+06	4.97271e+06	2.00863e+06	2.6123e+06	6.43835e+06	1.3485e+07	7.44383e+06	4.29426e+07
2014-03-30	5.98042e+06	4.97244e+06	2.00863e+06	2.61053e+06	6.43845e+06	1.3485e+07	7.44411e+06	4.29396e+07
2014-03-31	5.97904e+06	4.9722e+06	2.00863e+06	2.60876e+06	6.43855e+06	1.3485e+07	7.44439e+06	4.29365e+07
2014-04-01	5.97764e+06	4.97199e+06	2.00863e+06	2.60699e+06	6.43864e+06	1.3485e+07	7.44468e+06	4.29335e+07
2014-04-02	5.97622e+06	4.97181e+06	2.00863e+06	2.60508e+06	6.43872e+06	1.34849e+07	7.44497e+06	4.29304e+07
2014-04-03	5.97478e+06	4.97165e+06	2.00863e+06	2.60286e+06	6.43879e+06	1.34849e+07	7.44526e+06	4.29268e+07
2014-04-04	5.97333e+06	4.97152e+06	2.00863e+06	2.60036e+06	6.43885e+06	1.34847e+07	7.44556e+06	4.2923e+07
2014-04-05	5.97186e+06	4.97142e+06	2.00863e+06	2.59761e+06	6.4389e+06	1.34846e+07	7.44587e+06	4.29189e+07
2014-04-06	5.97037e+06	4.97134e+06	2.00863e+06	2.59462e+06	6.43893e+06	1.34844e+07	7.44618e+06	4.29144e+07
2014-04-07	5.96886e+06	4.9713e+06	2.00863e+06	2.59142e+06	6.43895e+06	1.34841e+07	7.4465e+06	4.29098e+07
2014-04-08	5.96734e+06	4.97129e+06	2.00863e+06	2.58804e+06	6.43896e+06	1.34839e+07	7.44682e+06	4.29049e+07
2014-04-09	5.96556e+06	4.97129e+06	2.00863e+06	2.58449e+06	6.43892e+06	1.34836e+07	7.44715e+06	4.28996e+07
2014-04-10	5.96332e+06	4.97129e+06	2.00863e+06	2.5808e+06	6.4388e+06	1.34832e+07	7.4475e+06	4.28936e+07
2014-04-11	5.96066e+06	4.97129e+06	2.00863e+06	2.577e+06	6.43862e+06	1.34829e+07	7.44787e+06	4.2887e+07
2014-04-12	5.95766e+06	4.97129e+06	2.00863e+06	2.57311e+06	6.43838e+06	1.34825e+07	7.44826e+06	4.28798e+07
2014-04-13	5.95435e+06	4.97129e+06	2.00863e+06	2.56914e+06	6.43809e+06	1.34821e+07	7.44866e+06	4.28723e+07
2014-04-14	5.9508e+06	4.97129e+06	2.00863e+06	2.56513e+06	6.43776e+06	1.34817e+07	7.44908e+06	4.28644e+07
2014-04-15	5.94706e+06	4.97129e+06	2.00863e+06	2.5611e+06	6.4374e+06	1.34813e+07	7.44951e+06	4.28563e+07
2014-04-16	5.94318e+06	4.97129e+06	2.00863e+06	2.55707e+06	6.43702e+06	1.34809e+07	7.44996e+06	4.2848e+07
2014-04-17	5.93921e+06	4.97129e+06	2.00863e+06	2.55306e+06	6.43663e+06	1.34805e+07	7.45042e+06	4.28397e+07
2014-04-18	5.93521e+06	4.97129e+06	2.00863e+06	2.5491e+06	6.43623e+06	1.348e+07	7.45088e+06	4.28314e+07
2014-04-19	5.93124e+06	4.97129e+06	2.00863e+06	2.54521e+06	6.43583e+06	1.34796e+07	7.45136e+06	4.28232e+07
2014-04-20	5.92735e+06	4.97129e+06	2.00863e+06	2.54142e+06	6.43545e+06	1.34792e+07	7.45185e+06	4.28152e+07
2014-04-21	5.92359e+06	4.97129e+06	2.00863e+06	2.53774e+06	6.43509e+06	1.34788e+07	7.45234e+06	4.28075e+07
2014-04-22	5.92001e+06	4.97129e+06	2.00863e+06	2.5342e+06	6.43476e+06	1.34784e+07	7.45284e+06	4.28002e+07
2014-04-23	5.91667e+06	4.97129e+06	2.00863e+06	2.53083e+06	6.43447e+06	1.34781e+07	7.45335e+06	4.27933e+07
2014-04-24	5.91363e+06	4.97129e+06	2.00863e+06	2.52765e+06	6.43422e+06	1.34777e+07	7.45386e+06	4.2787e+07
2014-04-25	5.91075e+06	4.97129e+06	2.00863e+06	2.52468e+06	6.43402e+06	1.34774e+07	7.45437e+06	4.27811e+07
2014-04-26	5.90787e+06	4.97129e+06	2.00863e+06	2.52194e+06	6.43383e+06	1.34771e+07	7.45489e+06	4.27755e+07
2014-04-27	5.90498e+06	4.97129e+06	2.00863e+06	2.51946e+06	6.43366e+06	1.34768e+07	7.45541e+06	4.27702e+07
2014-04-28	5.90208e+06	4.97129e+06	2.00863e+06	2.51727e+06	6.4335e+06	1.34766e+07	7.45592e+06	4.27652e+07
2014-04-29	5.89918e+06	4.97129e+06	2.00863e+06	2.51537e+06	6.43335e+06	1.34764e+07	7.45644e+06	4.27606e+07
2014-04-30	5.89627e+06	4.97129e+06	2.00863e+06	2.51381e+06	6.4332e+06	1.34762e+07	7.45695e+06	4.27563e+07
2014-05-01	5.89336e+06	4.97129e+06	2.00863e+06	2.5126e+06	6.43306e+06	1.34761e+07	7.45747e+06	4.27525e+07
2014-05-02	5.89045e+06	4.97129e+06	2.00863e+06	2.51176e+06	6.43292e+06	1.3476e+07	7.45797e+06	4.2749e+07
2014-05-03	5.88754e+06	4.97129e+06	2.00863e+06	2.51132e+06	6.43278e+06	1.3476e+07	7.45847e+06	4.2746e+07
2014-05-04	5.88462e+06	4.97129e+06	2.00863e+06	2.51109e+06	6.43264e+06	1.3476e+07	7.45897e+06	4.27432e+07
2014-05-05	5.8817e+06	4.97129e+06	2.00863e+06	2.51086e+06	6.43249e+06	1.3476e+07	7.45946e+06	4.27404e+07
2014-05-06	5.87878e+06	4.97129e+06	2.00863e+06	2.51064e+06	6.43233e+06	1.3476e+07	7.45994e+06	4.27376e+07
2014-05-07	5.87586e+06	4.97129e+06	2.00863e+06	2.51042e+06	6.43215e+06	1.3476e+07	7.46041e+06	4.27347e+07
2014-05-08	5.87293e+06	4.97129e+06	2.00863e+06	2.51021e+06	6.43197e+06	1.3476e+07	7.46087e+06	4.27319e+07
2014-05-09	5.87001e+06	4.97129e+06	2.00863e+06	2.51e+06	6.43176e+06	1.3476e+07	7.46132e+06	4.2729e+07
2014-05-10	5.86708e+06	4.97129e+06	2.00863e+06	2.50979e+06	6.43153e+06	1.3476e+07	7.46176e+06	4.27261e+07
2014-05-11	5.86416e+06	4.97129e+06	2.00863e+06	2.50959e+06	6.43127e+06	1.3476e+07	7.46221e+06	4.27231e+07
2014-05-12	5.86124e+06	4.97129e+06	2.00863e+06	2.50939e+06	6.43097e+06	1.3476e+07	7.4627e+06	4.27202e+07
2014-05-13	5.85832e+06	4.97129e+06	2.00863e+06	2.5092e+06	6.43063e+06	1.3476e+07	7.46321e+06	4.27173e+07
2014-05-14	5.8554e+06	4.97129e+06	2.00863e+06	2.50901e+06	6.43025e+06	1.3476e+07	7.46374e+06	4.27143e+07
2014-05-15	5.85248e+06	4.97129e+06	2.00863e+06	2.50882e+06	6.42985e+06	1.3476e+07	7.46428e+06	4.27114e+07
2014-05-16	5.84957e+06	4.97129e+06	2.00863e+06	2.50863e+06	6.42943e+06	1.3476e+07	7.46482e+06	4.27084e+07
2014-05-17	5.84666e+06	4.97129e+06	2.00863e+06	2.50845e+06	6.42899e+06	1.3476e+07	7.46535e+06	4.27054e+07
2014-05-18	5.84375e+06	4.97129e+06	2.00863e+06	2.50828e+06	6.42853e+06	1.3476e+07	7.46586e+06	4.27024e+07
2014-05-19	5.84085e+06	4.97129e+06	2.00863e+06	2.5081e+06	6.42807e+06	1.3476e+07	7.46634e+06	4.26993e+07
2014-05-20	5.83795e+06	4.97129e+06	2.00863e+06	2.50793e+06	6.42761e+06	1.3476e+07	7.46679e+06	4.26962e+07
2014-05-21	5.83506e+06	4.97129e+06	2.00863e+06	2.50776e+06	6.42715e+06	1.3476e+07	7.4672e+06	4.26931e+07
2014-05-22	5.83217e+06	4.97129e+06	2.00863e+06	2.5076e+06	6.4267e+06	1.3476e+07	7.46755e+06	4.269e+07
2014-05-23	5.82929e+06	4.97129e+06	2.00863e+06	2.50744e+06	6.42627e+06	1.34761e+07	7.46783e+06	4.26868e+07
2014-05-24	5.82641e+06	4.97129e+06	2.00863e+06	2.50728e+06	6.42585e+06	1.34761e+07	7.46805e+06	4.26836e+07
2014-05-25	5.82354e+06	4.97129e+06	2.00863e+06	2.50713e+06	6.42546e+06	1.34761e+07	7.46819e+06	4.26803e+07
2014-05-26	5.82068e+06	4.97129e+06	2.00863e+06	2.50698e+06	6.42509e+06	1.34761e+07	7.46824e+06	4.2677e+07
2014-05-27	5.81782e+06	4.97129e+06	2.00855e+06	2.50683e+06	6.42474e+06	1.34761e+07	7.4682e+06	4.26735e+07
2014-05-28	5.81498e+06	4.97129e+06	2.00832e+06	2.50669e+06	6.42439e+06	1.34761e+07	7.46808e+06	4.26698e+07
2014-05-29	5.81214e+06	4.97129e+06	2.00793e+06	2.50654e+06	6.42403e+06	1.34761e+07	7.46788e+06	4.26659e+07
2014-05-30	5.80931e+06	4.97129e+06	2.00739e+06	2.5064e+06	6.42367e+06	1.34761e+07	7.46762e+06	4.26618e+07
2014-05-31	5.80649e+06	4.97129e+06	2.0067e+06	2.50627e+06	6.42331e+06	1.34761e+07	7.46728e+06	4.26575e+07
2014-06-01	5.80368e+06	4.97129e+06	2.00588e+06	2.50613e+06	6.42294e+06	1.34761e+07	7.46687e+06	4.26529e+07
2014-06-02	5.80088e+06	4.97129e+06	2.00491e+06	2.506e+06	6.42258e+06	1.34762e+07	7.46639e+06	4.26482e+07
2014-06-03	5.79809e+06	4.97129e+06	2.0038e+06	2.50588e+06	6.4222e+06	1.34762e+07	7.46584e+06	4.26433e+07
2014-06-04	5.79531e+06	4.97129e+06	2.00257e+06	2.50575e+06	6.42183e+06	1.34762e+07	7.46524e+06	4.26382e+07
2014-06-05	5.79254e+06	4.97129e+06	2.0012e+06	2.50563e+06	6.42145e+06	1.34762e+07	7.46457e+06	4.26329e+07
2014-06-06	5.78979e+06	4.97129e+06	1.99971e+06	2.50551e+06	6.42107e+06	1.34762e+07	7.46383e+06	4.26274e+07
2014-06-07	5.78705e+06	4.97129e+06	1.9981e+06	2.50539e+06	6.42069e+06	1.34762e+07	7.46305e+06	4.26218e+07
2014-06-08	5.78432e+06	4.97129e+06	1.99637e+06	2.50528e+06	6.42031e+06	1.34762e+07	7.4622e+06	4.2616e+07
2014-06-09	5.7816e+06	4.97129e+06	1.99452e+06	2.50516e+06	6.41993e+06	1.34762e+07	7.4613e+06	4.261e+07
2014-06-10	5.7789e+06	4.97129e+06	1.99256e+06	2.50505e+06	6.41955e+06	1.34763e+07	7.46035e+06	4.26039e+07
2014-06-11	5.77621e+06	4.97129e+06	1.99049e+06	2.50495e+06	6.41916e+06	1.34763e+07	7.45935e+06	4.25977e+07
2014-06-12	5.77353e+06	4.97129e+06	1.98832e+06	2.50484e+06	6.41878e+06	1.34763e+07	7.4583e+06	4.25913e+07
2014-06-13	5.77087e+06	4.97129e+06	1.98605e+06	2.50474e+06	6.41839e+06	1.34763e+07	7.45721e+06	4.25848e+07
2014-06-14	5.76823e+06	4.97129e+06	1.98368e+06	2.50464e+06	6.418e+06	1.34763e+07	7.45607e+06	4.25782e+07
2014-06-15	5.7656e+06	4.97129e+06	1.98121e+06	2.50454e+06	6.41762e+06	1.34763e+07	7.45489e+06	4.25715e+07
2014-06-16	5.76299e+06	4.97129e+06	1.97865e+06	2.50444e+06	6.41723e+06	1.34763e+07	7.45367e+06	4.25646e+07
2014-06-17	5.76039e+06	4.97129e+06	1.97601e+06	2.50435e+06	6.41684e+06	1.34763e+07	7.45241e+06	4.25576e+07
2014-06-18	5.75782e+06	4.97129e+06	1.97328e+06	2.50425e+06	6.41646e+06	1.34764e+07	7.45111e+06	4.25506e+07
2014-06-19	5.75526e+06	4.97129e+06	1.97047e+06	2.50416e+06	6.41607e+06	1.34764e+07	7.44979e+06	4.25434e+07
2014-06-20	5.75271e+06	4.97129e+06	1.96758e+06	2.50408e+06	6.41569e+06	1.34764e+07	7.44842e+06	4.25362e+07
2014-06-21	5.75019e+06	4.97129e+06	1.96462e+06	2.50399e+06	6.41531e+06	1.34764e+07	7.44703e+06	4.25288e+07
2014-06-22	5.74769e+06	4.97129e+06	1.96159e+06	2.5039e+06	6.41493e+06	1.34764e+07	7.44561e+06	4.25214e+07
2014-06-23	5.7452e+06	4.97129e+06	1.95849e+06	2.50382e+06	6.41455e+06	1.34764e+07	7.44417e+06	4.2514e+07
2014-06-24	5.74274e+06	4.97129e+06	1.95533e+06	2.50374e+06	6.41417e+06	1.34764e+07	7.4427e+06	4.25064e+07
2014-06-25	5.74029e+06	4.97129e+06	1.95211e+06	2.50366e+06	6.41379e+06	1.34765e+07	7.44121e+06	4.24988e+07
2014-06-26	5.73787e+06	4.97129e+06	1.94883e+06	2.50358e+06	6.41342e+06	1.34765e+07	7.4397e+06	4.24912e+07
2014-06-27	5.73546e+06	4.97129e+06	1.9455e+06	2.50351e+06	6.41305e+06	1.34765e+07	7.43817e+06	4.24835e+07
2014-06-28	5.73308e+06	4.97129e+06	1.94212e+06	2.50343e+06	6.41268e+06	1.34765e+07	7.43662e+06	4.24757e+07
2014-06-29	5.73072e+06	4.97129e+06	1.9387e+06	2.50336e+06	6.41232e+06	1.34765e+07	7.43506e+06	4.2468e+07
2014-06-30	5.72838e+06	4.97129e+06	1.93523e+06	2.50329e+06	6.41195e+06	1.34765e+07	7.43349e+06	4.24602e+07
2014-07-01	5.72607e+06	4.97129e+06	1.93172e+06	2.50322e+06	6.4116e+06	1.34765e+07	7.43191e+06	4.24523e+07
2014-07-02	5.72378e+06	4.97129e+06	1.92817e+06	2.50315e+06	6.41124e+06	1.34766e+07	7.43032e+06	4.24445e+07
2014-07-03	5.72151e+06	4.97129e+06	1.9246e+06	2.50308e+06	6.41089e+06	1.34766e+07	7.42873e+06	4.24367e+07
2014-07-04	5.71926e+06	4.97129e+06	1.92099e+06	2.50301e+06	6.41054e+06	1.34766e+07	7.42713e+06	4.24288e+07
2014-07-05	5.71705e+06	4.97129e+06	1.91736e+06	2.50295e+06	6.4102e+06	1.34766e+07	7.42553e+06	4.2421e+07
2014-07-06	5.71485e+06	4.97129e+06	1.91371e+06	2.50288e+06	6.40986e+06	1.34766e+07	7.42393e+06	4.24131e+07
2014-07-07	5.71268e+06	4.97129e+06	1.91003e+06	2.50282e+06	6.40952e+06	1.34766e+07	7.42233e+06	4.24053e+07
2014-07-08	5.71054e+06	4.97129e+06	1.90635e+06	2.50276e+06	6.40919e+06	1.34766e+07	7.42073e+06	4.23975e+07
2014-07-09	5.70843e+06	4.97129e+06	1.90265e+06	2.5027e+06	6.40887e+06	1.34767e+07	7.41914e+06	4.23897e+07
2014-07-10	5.70634e+06	4.97129e+06	1.89894e+06	2.50264e+06	6.40855e+06	1.34767e+07	7.41756e+06	4.2382e+07
2014-07-11	5.70427e+06	4.97129e+06	1.89523e+06	2.50258e+06	6.40823e+06	1.34767e+07	7.41599e+06	4.23743e+07
2014-07-12	5.70224e+06	4.97129e+06	1.89152e+06	2.50252e+06	6.40792e+06	1.34767e+07	7.41443e+06	4.23666e+07
2014-07-13	5.70023e+06	4.97129e+06	1.8878e+06	2.50247e+06	6.40762e+06	1.34767e+07	7.41289e+06	4.2359e+07
2014-07-14	5.69826e+06	4.97129e+06	1.8841e+06	2.50241e+06	6.40732e+06	1.34767e+07	7.41136e+06	4.23515e+07
2014-07-15	5.69631e+06	4.97129e+06	1.8804e+06	2.50236e+06	6.40703e+06	1.34767e+07	7.40985e+06	4.2344e+07
2014-07-16	5.69439e+06	4.97129e+06	1.87672e+06	2.5023e+06	6.40675e+06	1.34768e+07	7.40835e+06	4.23365e+07
2014-07-17	5.6925e+06	4.97129e+06	1.87305e+06	2.50225e+06	6.40647e+06	1.34768e+07	7.40689e+06	4.23292e+07
2014-07-18	5.69064e+06	4.97129e+06	1.8694e+06	2.50219e+06	6.4062e+06	1.34768e+07	7.40544e+06	4.23219e+07
2014-07-19	5.68881e+06	4.97129e+06	1.86578e+06	2.50214e+06	6.40594e+06	1.34768e+07	7.40402e+06	4.23148e+07
2014-07-20	5.68701e+06	4.97129e+06	1.86218e+06	2.50209e+06	6.40568e+06	1.34768e+07	7.40263e+06	4.23077e+07
2014-07-21	5.68525e+06	4.97129e+06	1.85861e+06	2.50204e+06	6.40543e+06	1.34768e+07	7.40127e+06	4.23007e+07
2014-07-22	5.68351e+06	4.97129e+06	1.85507e+06	2.50199e+06	6.40519e+06	1.34768e+07	7.39994e+06	4.22938e+07
2014-07-23	5.68181e+06	4.97129e+06	1.85157e+06	2.50194e+06	6.40496e+06	1.34768e+07	7.39865e+06	4.2287e+07
2014-07-24	5.68014e+06	4.97129e+06	1.84812e+06	2.50189e+06	6.40473e+06	1.34768e+07	7.39739e+06	4.22804e+07
2014-07-25	5.67851e+06	4.97129e+06	1.8447e+06	2.50184e+06	6.40451e+06	1.34769e+07	7.39617e+06	4.22739e+07
2014-07-26	5.67691e+06	4.97129e+06	1.84133e+06	2.50179e+06	6.4043e+06	1.34769e+07	7.39498e+06	4.22675e+07
2014-07-27	5.67534e+06	4.97129e+06	1.83801e+06	2.50174e+06	6.4041e+06	1.34769e+07	7.39385e+06	4.22612e+07
2014-07-28	5.67381e+06	4.97129e+06	1.83475e+06	2.50169e+06	6.40391e+06	1.34769e+07	7.39275e+06	4.22551e+07
2014-07-29	5.67231e+06	4.97129e+06	1.83154e+06	2.50164e+06	6.40373e+06	1.34769e+07	7.3917e+06	4.22491e+07
2014-07-30	5.67085e+06	4.97129e+06	1.8284e+06	2.50159e+06	6.40356e+06	1.34769e+07	7.3907e+06	4.22433e+07
2014-07-31	5.66943e+06	4.97129e+06	1.82531e+06	2.50154e+06	6.4034e+06	1.34769e+07	7.38975e+06	4.22376e+07
2014-08-01	5.66804e+06	4.97129e+06	1.8223e+06	2.50149e+06	6.40324e+06	1.34769e+07	7.38885e+06	4.22321e+07
2014-08-02	5.66668e+06	4.97129e+06	1.81936e+06	2.50144e+06	6.4031e+06	1.34769e+07	7.38801e+06	4.22268e+07
2014-08-03	5.66537e+06	4.97129e+06	1.81649e+06	2.50139e+06	6.40297e+06	1.34769e+07	7.38722e+06	4.22217e+07
2014-08-04	5.66409e+06	4.97129e+06	1.8137e+06	2.50134e+06	6.40285e+06	1.3477e+07	7.38649e+06	4.22167e+07
2014-08-05	5.66285e+06	4.97129e+06	1.81099e+06	2.50129e+06	6.40274e+06	1.3477e+07	7.38582e+06	4.22119e+07
2014-08-06	5.66165e+06	4.97129e+06	1.80837e+06	2.50124e+06	6.40263e+06	1.3477e+07	7.38521e+06	4.22074e+07
2014-08-07	5.66049e+06	4.97129e+06	1.80583e+06	2.50119e+06	6.40254e+06	1.3477e+07	7.38467e+06	4.2203e+07
2014-08-08	5.65937e+06	4.97129e+06	1.80339e+06	2.50114e+06	6.40247e+06	1.3477e+07	7.38419e+06	4.21988e+07
2014-08-09	5.65829e+06	4.97129e+06	1.80104e+06	2.50109e+06	6.4024e+06	1.3477e+07	7.38378e+06	4.21949e+07
2014-08-10	5.65725e+06	4.97129e+06	1.7988e+06	2.50104e+06	6.40234e+06	1.3477e+07	7.38344e+06	4.21911e+07
2014-08-11	5.65625e+06	4.97129e+06	1.79665e+06	2.50098e+06	6.4023e+06	1.3477e+07	7.38317e+06	4.21876e+07
2014-08-12	5.65529e+06	4.97129e+06	1.79461e+06	2.50093e+06	6.40227e+06	1.3477e+07	7.38298e+06	4.21844e+07
2014-08-13	5.65437e+06	4.97129e+06	1.79268e+06	2.50088e+06	6.40225e+06	1.3477e+07	7.38286e+06	4.21813e+07
2014-08-14	5.65349e+06	4.97129e+06	1.79086e+06	2.50083e+06	6.40224e+06	1.3477e+07	7.38282e+06	4.21785e+07
2014-08-15	5.65264e+06	4.97129e+06	1.78909e+06	2.50077e+06	6.40228e+06	1.3477e+07	7.38283e+06	4.21759e+07
2014-08-16	5.65181e+06	4.97084e+06	1.78729e+06	2.50072e+06	6.40236e+06	1.3477e+07	7.38286e+06	4.21729e+07
2014-08-17	5.65098e+06	4.96951e+06	1.78548e+06	2.50066e+06	6.40251e+06	1.3477e+07	7.38291e+06	4.21691e+07
2014-08-18	5.65017e+06	4.96732e+06	1.78366e+06	2.5006e+06	6.40271e+06	1.3477e+07	7.38298e+06	4.21645e+07
2014-08-19	5.64937e+06	4.96426e+06	1.78182e+06	2.50054e+06	6.40297e+06	1.3477e+07	7.38307e+06	4.21591e+07
2014-08-20	5.64858e+06	4.96037e+06	1.77997e+06	2.50049e+06	6.40327e+06	1.3477e+07	7.38317e+06	4.21529e+07
2014-08-21	5.6478e+06	4.95565e+06	1.77811e+06	2.50043e+06	6.40362e+06	1.3477e+07	7.38329e+06	4.21459e+07
2014-08-22	5.64704e+06	4.95011e+06	1.77625e+06	2.50037e+06	6.40401e+06	1.3477e+07	7.38342e+06	4.21382e+07
2014-08-23	5.64628e+06	4.94377e+06	1.77439e+06	2.5003e+06	6.40445e+06	1.3477e+07	7.38357e+06	4.21298e+07
2014-08-24	5.64554e+06	4.93663e+06	1.77252e+06	2.50024e+06	6.40493e+06	1.3477e+07	7.38373e+06	4.21206e+07
2014-08-25	5.6448e+06	4.92873e+06	1.77066e+06	2.50018e+06	6.40544e+06	1.3477e+07	7.38391e+06	4.21108e+07
2014-08-26	5.64408e+06	4.92006e+06	1.7688e+06	2.50011e+06	6.40599e+06	1.3477e+07	7.38409e+06	4.21002e+07
2014-08-27	5.64336e+06	4.91064e+06	1.76695e+06	2.50005e+06	6.40658e+06	1.3477e+07	7.38429e+06	4.20889e+07
2014-08-28	5.64266e+06	4.90049e+06	1.7651e+06	2.49998e+06	6.40719e+06	1.3477e+07	7.3845e+06	4.2077e+07
2014-08-29	5.64197e+06	4.88961e+06	1.76327e+06	2.49991e+06	6.40783e+06	1.3477e+07	7.38471e+06	4.20643e+07
2014-08-30	5.64128e+06	4.87803e+06	1.76146e+06	2.49984e+06	6.4085e+06	1.3477e+07	7.38493e+06	4.20511e+07
2014-08-31	5.64061e+06	4.86575e+06	1.75966e+06	2.49977e+06	6.40919e+06	1.3477e+07	7.38516e+06	4.20372e+07
2014-09-01	5.63995e+06	4.85278e+06	1.75788e+06	2.4997e+06	6.4099e+06	1.3477e+07	7.3854e+06	4.20226e+07
2014-09-02	5.63929e+06	4.83915e+06	1.75612e+06	2.49962e+06	6.41062e+06	1.3477e+07	7.38564e+06	4.20075e+07
2014-09-03	5.63864e+06	4.82486e+06	1.75439e+06	2.49954e+06	6.41137e+06	1.3477e+07	7.38589e+06	4.19917e+07
2014-09-04	5.63801e+06	4.80993e+06	1.75268e+06	2.49947e+06	6.41213e+06	1.3477e+07	7.38614e+06	4.19754e+07
2014-09-05	5.63738e+06	4.79437e+06	1.751e+06	2.49939e+06	6.41289e+06	1.3477e+07	7.38639e+06	4.19584e+07
2014-09-06	5.63676e+06	4.7782e+06	1.74936e+06	2.49931e+06	6.41367e+06	1.3477e+07	7.38664e+06	4.19409e+07
2014-09-07	5.63615e+06	4.76142e+06	1.74774e+06	2.49922e+06	6.41445e+06	1.3477e+07	7.3869e+06	4.19229e+07
2014-09-08	5.63554e+06	4.74405e+06	1.74617e+06	2.49914e+06	6.41524e+06	1.3477e+07	7.38715e+06	4.19043e+07
2014-09-09	5.63495e+06	4.72611e+06	1.74463e+06	2.49905e+06	6.41603e+06	1.3477e+07	7.38741e+06	4.18852e+07
2014-09-10	5.63436e+06	4.7076e+06	1.74314e+06	2.49896e+06	6.41681e+06	1.3477e+07	7.38766e+06	4.18655e+07
2014-09-11	5.63378e+06	4.68855e+06	1.74169e+06	2.49887e+06	6.4176e+06	1.3477e+07	7.38791e+06	4.18454e+07
2014-09-12	5.63321e+06	4.66896e+06	1.74028e+06	2.49878e+06	6.41837e+06	1.3477e+07	7.38815e+06	4.18247e+07
2014-09-13	5.63264e+06	4.64884e+06	1.73893e+06	2.49869e+06	6.41914e+06	1.3477e+07	7.3884e+06	4.18036e+07
2014-09-14	5.63209e+06	4.62822e+06	1.73763e+06	2.49859e+06	6.4199e+06	1.3477e+07	7.38863e+06	4.1782e+07
2014-09-15	5.63153e+06	4.6071e+06	1.73638e+06	2.49849e+06	6.42065e+06	1.34769e+07	7.38886e+06	4.176e+07
2014-09-16	5.63099e+06	4.5855e+06	1.73518e+06	2.49839e+06	6.42137e+06	1.34769e+07	7.38908e+06	4.17375e+07
2014-09-17	5.63045e+06	4.56343e+06	1.73405e+06	2.49829e+06	6.42209e+06	1.34769e+07	7.3893e+06	4.17145e+07
2014-09-18	5.62992e+06	4.5409e+06	1.73298e+06	2.49818e+06	6.42278e+06	1.34769e+07	7.38951e+06	4.16912e+07
2014-09-19	5.6294e+06	4.51793e+06	1.73197e+06	2.49807e+06	6.42344e+06	1.34769e+07	7.3897e+06	4.16674e+07
2014-09-20	5.62888e+06	4.49453e+06	1.73103e+06	2.49796e+06	6.42408e+06	1.34769e+07	7.38989e+06	4.16433e+07
2014-09-21	5.62837e+06	4.47071e+06	1.73016e+06	2.49785e+06	6.4247e+06	1.34769e+07	7.39006e+06	4.16187e+07
2014-09-22	5.62786e+06	4.44649e+06	1.72936e+06	2.49774e+06	6.42528e+06	1.34769e+07	7.39022e+06	4.15938e+07
2014-09-23	5.62736e+06	4.42189e+06	1.72863e+06	2.49762e+06	6.42583e+06	1.34769e+07	7.39037e+06	4.15686e+07
2014-09-24	5.62686e+06	4.3969e+06	1.72798e+06	2.4975e+06	6.42635e+06	1.34769e+07	7.39051e+06	4.1543e+07
2014-09-25	5.62637e+06	4.37156e+06	1.7274e+06	2.49738e+06	6.42683e+06	1.34762e+07	7.39063e+06	4.15164e+07
2014-09-26	5.62589e+06	4.34586e+06	1.72691e+06	2.49726e+06	6.42727e+06	1.34744e+07	7.39073e+06	4.14883e+07
2014-09-27	5.62541e+06	4.31983e+06	1.72651e+06	2.49713e+06	6.42766e+06	1.34713e+07	7.39082e+06	4.14587e+07
2014-09-28	5.62493e+06	4.29347e+06	1.72618e+06	2.49701e+06	6.42802e+06	1.34673e+07	7.39088e+06	4.14278e+07
2014-09-29	5.62446e+06	4.2668e+06	1.72595e+06	2.49689e+06	6.42832e+06	1.34623e+07	7.39093e+06	4.13956e+07
2014-09-30	5.624e+06	4.23984e+06	1.72581e+06	2.49677e+06	6.42858e+06	1.34563e+07	7.39097e+06	4.13623e+07
2014-10-01	5.62353e+06	4.2126e+06	1.72576e+06	2.49664e+06	6.42878e+06	1.34496e+07	7.39098e+06	4.13279e+07
2014-10-02	5.62308e+06	4.18508e+06	1.72577e+06	2.49652e+06	6.42896e+06	1.34421e+07	7.39095e+06	4.12925e+07
2014-10-03	5.62262e+06	4.15731e+06	1.72578e+06	2.49639e+06	6.42913e+06	1.3434e+07	7.39089e+06	4.12561e+07
2014-10-04	5.62217e+06	4.1293e+06	1.7258e+06	2.49627e+06	6.4293e+06	1.34253e+07	7.39078e+06	4.12189e+07
2014-10-05	5.62172e+06	4.10106e+06	1.72583e+06	2.49614e+06	6.42948e+06	1.34161e+07	7.39063e+06	4.1181e+07
2014-10-06	5.62128e+06	4.0726e+06	1.72587e+06	2.49602e+06	6.42965e+06	1.34065e+07	7.39044e+06	4.11424e+07
2014-10-07	5.62084e+06	4.04394e+06	1.72592e+06	2.49589e+06	6.42982e+06	1.33966e+07	7.39021e+06	4.11032e+07
2014-10-08	5.6204e+06	4.01508e+06	1.72597e+06	2.49577e+06	6.42998e+06	1.33865e+07	7.38994e+06	4.10636e+07
2014-10-09	5.61997e+06	3.98606e+06	1.72603e+06	2.49564e+06	6.43015e+06	1.33762e+07	7.38963e+06	4.10236e+07
2014-10-10	5.61954e+06	3.95686e+06	1.7261e+06	2.49551e+06	6.43032e+06	1.33658e+07	7.38929e+06	4.09834e+07
2014-10-11	5.61911e+06	3.92752e+06	1.72618e+06	2.49538e+06	6.43048e+06	1.33554e+07	7.38891e+06	4.09429e+07
2014-10-12	5.61868e+06	3.89805e+06	1.72627e+06	2.49526e+06	6.43065e+06	1.3345e+07	7.38849e+06	4.09024e+07
2014-10-13	5.61826e+06	3.86844e+06	1.72636e+06	2.49513e+06	6.43081e+06	1.33349e+07	7.38804e+06	4.08619e+07
2014-10-14	5.61783e+06	3.83873e+06	1.72646e+06	2.495e+06	6.43097e+06	1.3325e+07	7.38755e+06	4.08215e+07
2014-10-15	5.61741e+06	3.80893e+06	1.72657e+06	2.49487e+06	6.43113e+06	1.33154e+07	7.38703e+06	4.07813e+07
2014-10-16	5.61699e+06	3.77904e+06	1.72668e+06	2.49474e+06	6.43129e+06	1.33062e+07	7.38648e+06	4.07415e+07
2014-10-17	5.61657e+06	3.74908e+06	1.7268e+06	2.49461e+06	6.43144e+06	1.32975e+07	7.3859e+06	4.0702e+07
2014-10-18	5.61616e+06	3.71906e+06	1.72693e+06	2.49448e+06	6.4316e+06	1.32894e+07	7.38529e+06	4.06629e+07
2014-10-19	5.61574e+06	3.689e+06	1.72706e+06	2.49435e+06	6.43175e+06	1.3282e+07	7.38465e+06	4.06245e+07
2014-10-20	5.61533e+06	3.65891e+06	1.7272e+06	2.49421e+06	6.43191e+06	1.32752e+07	7.38398e+06	4.05868e+07
2014-10-21	5.61491e+06	3.6288e+06	1.72735e+06	2.49408e+06	6.43206e+06	1.32693e+07	7.38329e+06	4.05498e+07
2014-10-22	5.6145e+06	3.59869e+06	1.7275e+06	2.49395e+06	6.43221e+06	1.32643e+07	7.38256e+06	4.05137e+07
2014-10-23	5.61409e+06	3.56859e+06	1.72766e+06	2.49381e+06	6.43236e+06	1.32602e+07	7.38181e+06	4.04786e+07
2014-10-24	5.61367e+06	3.53852e+06	1.72782e+06	2.49368e+06	6.43251e+06	1.32572e+07	7.38104e+06	4.04445e+07
2014-10-25	5.61326e+06	3.50848e+06	1.72799e+06	2.49355e+06	6.43266e+06	1.32554e+07	7.38024e+06	4.04116e+07
2014-10-26	5.61285e+06	3.47849e+06	1.72817e+06	2.49341e+06	6.4328e+06	1.32547e+07	7.37942e+06	4.03799e+07
2014-10-27	5.61244e+06	3.44856e+06	1.72835e+06	2.49327e+06	6.43295e+06	1.32548e+07	7.37858e+06	4.03489e+07
2014-10-28	5.61202e+06	3.41871e+06	1.72854e+06	2.49314e+06	6.43309e+06	1.32548e+07	7.37771e+06	4.0318e+07
2014-10-29	5.61161e+06	3.38895e+06	1.72873e+06	2.493e+06	6.43323e+06	1.32549e+07	7.37683e+06	4.02873e+07
2014-10-30	5.6112e+06	3.3593e+06	1.72892e+06	2.49286e+06	6.43337e+06	1.32551e+07	7.37592e+06	4.02567e+07
2014-10-31	5.61078e+06	3.32976e+06	1.72912e+06	2.49273e+06	6.43351e+06	1.32553e+07	7.375e+06	4.02262e+07
2014-11-01	5.61036e+06	3.30035e+06	1.72933e+06	2.49259e+06	6.43365e+06	1.32556e+07	7.37406e+06	4.01959e+07
2014-11-02	5.60995e+06	3.27108e+06	1.72954e+06	2.49245e+06	6.43379e+06	1.32558e+07	7.3731e+06	4.01657e+07
2014-11-03	5.60953e+06	3.24197e+06	1.72975e+06	2.49231e+06	6.43392e+06	1.32562e+07	7.37213e+06	4.01358e+07
2014-11-04	5.6091e+06	3.21303e+06	1.72997e+06	2.49217e+06	6.43406e+06	1.32565e+07	7.37114e+06	4.0106e+07
2014-11-05	5.60868e+06	3.18427e+06	1.7302e+06	2.49203e+06	6.43419e+06	1.32569e+07	7.37014e+06	4.00765e+07
2014-11-06	5.60826e+06	3.15571e+06	1.73042e+06	2.49188e+06	6.43432e+06	1.32574e+07	7.36912e+06	4.00471e+07
2014-11-07	5.60783e+06	3.12736e+06	1.73065e+06	2.49174e+06	6.43445e+06	1.32579e+07	7.36809e+06	4.0018e+07
2014-11-08	5.6074e+06	3.09924e+06	1.73089e+06	2.4916e+06	6.43458e+06	1.32584e+07	7.36705e+06	3.99891e+07
2014-11-09	5.60697e+06	3.07135e+06	1.73113e+06	2.49145e+06	6.43471e+06	1.32589e+07	7.366e+06	3.99605e+07
2014-11-10	5.60653e+06	3.0437e+06	1.73137e+06	2.49131e+06	6.43484e+06	1.32595e+07	7.36494e+06	3.99322e+07
2014-11-11	5.6061e+06	3.01633e+06	1.73161e+06	2.49116e+06	6.43496e+06	1.32601e+07	7.36387e+06	3.99042e+07
2014-11-12	5.60566e+06	2.98922e+06	1.73186e+06	2.49102e+06	6.43508e+06	1.32608e+07	7.36279e+06	3.98764e+07
2014-11-13	5.60521e+06	2.96241e+06	1.73211e+06	2.49087e+06	6.43521e+06	1.32615e+07	7.36171e+06	3.9849e+07
2014-11-14	5.60476e+06	2.9359e+06	1.73237e+06	2.49072e+06	6.43533e+06	1.32622e+07	7.36061e+06	3.98219e+07
2014-11-15	5.60431e+06	2.90971e+06	1.73263e+06	2.49058e+06	6.43545e+06	1.32629e+07	7.35952e+06	3.97951e+07
2014-11-16	5.60386e+06	2.88385e+06	1.73288e+06	2.49043e+06	6.43557e+06	1.32637e+07	7.35842e+06	3.97687e+07
2014-11-17	5.6034e+06	2.85833e+06	1.73315e+06	2.49028e+06	6.43568e+06	1.32645e+07	7.35731e+06	3.97426e+07
2014-11-18	5.60294e+06	2.83316e+06	1.73341e+06	2.49013e+06	6.4358e+06	1.32653e+07	7.3562e+06	3.97169e+07
2014-11-19	5.60247e+06	2.80837e+06	1.73368e+06	2.48998e+06	6.43591e+06	1.32661e+07	7.3551e+06	3.96916e+07
2014-11-20	5.602e+06	2.78396e+06	1.73395e+06	2.48983e+06	6.43603e+06	1.3267e+07	7.35399e+06	3.96667e+07
2014-11-21	5.60152e+06	2.75994e+06	1.73422e+06	2.48967e+06	6.43614e+06	1.32679e+07	7.35287e+06	3.96423e+07
2014-11-22	5.60104e+06	2.73634e+06	1.73449e+06	2.48952e+06	6.43625e+06	1.32688e+07	7.35177e+06	3.96182e+07
2014-11-23	5.60056e+06	2.71316e+06	1.73476e+06	2.48937e+06	6.43636e+06	1.32697e+07	7.35066e+06	3.95946e+07
2014-11-24	5.60007e+06	2.69041e+06	1.73504e+06	2.48921e+06	6.43647e+06	1.32707e+07	7.34955e+06	3.95714e+07
2014-11-25	5.59957e+06	2.66811e+06	1.73532e+06	2.48906e+06	6.43657e+06	1.32716e+07	7.34845e+06	3.95487e+07
2014-11-26	5.59907e+06	2.64628e+06	1.73559e+06	2.4889e+06	6.43668e+06	1.32726e+07	7.34735e+06	3.95265e+07
2014-11-27	5.59856e+06	2.62492e+06	1.73587e+06	2.48874e+06	6.43678e+06	1.32736e+07	7.34626e+06	3.95048e+07
2014-11-28	5.59805e+06	2.60406e+06	1.73615e+06	2.48859e+06	6.43688e+06	1.32746e+07	7.34518e+06	3.94836e+07
2014-11-29	5.59753e+06	2.58369e+06	1.73644e+06	2.48843e+06	6.43698e+06	1.32757e+07	7.3441e+06	3.94629e+07
2014-11-30	5.59701e+06	2.56384e+06	1.73672e+06	2.48827e+06	6.43708e+06	1.32767e+07	7.34303e+06	3.94427e+07
2014-12-01	5.59648e+06	2.54452e+06	1.737e+06	2.48811e+06	6.43718e+06	1.32778e+07	7.34196e+06	3.9423e+07
2014-12-02	5.59594e+06	2.52575e+06	1.73728e+06	2.48795e+06	6.43728e+06	1.32789e+07	7.34091e+06	3.9404e+07
2014-12-03	5.5954e+06	2.50752e+06	1.73757e+06	2.48779e+06	6.43737e+06	1.328e+07	7.33987e+06	3.93855e+07
2014-12-04	5.59484e+06	2.48987e+06	1.73785e+06	2.48762e+06	6.43747e+06	1.3281e+07	7.33884e+06	3.93675e+07
2014-12-05	5.59428e+06	2.47243e+06	1.73813e+06	2.48746e+06	6.43756e+06	1.32821e+07	7.33783e+06	3.93498e+07
2014-12-06	5.59371e+06	2.45482e+06	1.73842e+06	2.4873e+06	6.43765e+06	1.32833e+07	7.33685e+06	3.9332e+07
2014-12-07	5.59312e+06	2.43705e+06	1.7387e+06	2.48713e+06	6.43774e+06	1.32844e+07	7.3359e+06	3.9314e+07
2014-12-08	5.59252e+06	2.41913e+06	1.73898e+06	2.48697e+06	6.43783e+06	1.32855e+07	7.33497e+06	3.92959e+07
2014-12-09	5.59191e+06	2.40107e+06	1.73926e+06	2.4868e+06	6.43792e+06	1.32866e+07	7.33406e+06	3.92777e+07
2014-12-10	5.59129e+06	2.38288e+06	1.73954e+06	2.48663e+06	6.438e+06	1.32878e+07	7.33318e+06	3.92593e+07
2014-12-11	5.59065e+06	2.36456e+06	1.73982e+06	2.48646e+06	6.43809e+06	1.32889e+07	7.33231e+06	3.92408e+07
2014-12-12	5.59001e+06	2.34612e+06	1.7401e+06	2.48629e+06	6.43817e+06	1.329e+07	7.33146e+06	3.92222e+07
2014-12-13	5.58935e+06	2.32757e+06	1.74038e+06	2.48612e+06	6.43825e+06	1.32912e+07	7.33063e+06	3.92035e+07
2014-12-14	5.58868e+06	2.30891e+06	1.74066e+06	2.48595e+06	6.43833e+06	1.32923e+07	7.3298e+06	3.91847e+07
2014-12-15	5.58801e+06	2.29015e+06	1.74093e+06	2.48578e+06	6.43841e+06	1.32934e+07	7.32899e+06	3.91657e+07
2014-12-16	5.58732e+06	2.27131e+06	1.74121e+06	2.48561e+06	6.43849e+06	1.32946e+07	7.32819e+06	3.91467e+07
2014-12-17	5.58663e+06	2.25238e+06	1.74148e+06	2.48543e+06	6.43856e+06	1.32957e+07	7.3274e+06	3.91276e+07
2014-12-18	5.58593e+06	2.23337e+06	1.74175e+06	2.48526e+06	6.43864e+06	1.32968e+07	7.32661e+06	3.91084e+07
2014-12-19	5.58522e+06	2.2143e+06	1.74202e+06	2.48508e+06	6.43871e+06	1.3298e+07	7.32583e+06	3.90891e+07
2014-12-20	5.5845e+06	2.19516e+06	1.74229e+06	2.48491e+06	6.43878e+06	1.32991e+07	7.32504e+06	3.90698e+07
2014-12-21	5.58378e+06	2.17597e+06	1.74255e+06	2.48473e+06	6.43885e+06	1.33002e+07	7.32426e+06	3.90503e+07
2014-12-22	5.58305e+06	2.15673e+06	1.74281e+06	2.48455e+06	6.43892e+06	1.33013e+07	7.32347e+06	3.90308e+07
2014-12-23	5.58231e+06	2.13746e+06	1.74307e+06	2.48437e+06	6.43899e+06	1.33024e+07	7.32268e+06	3.90113e+07
2014-12-24	5.58157e+06	2.11815e+06	1.74333e+06	2.48419e+06	6.43906e+06	1.33035e+07	7.32188e+06	3.89917e+07
2014-12-25	5.58082e+06	2.09882e+06	1.74358e+06	2.48401e+06	6.43912e+06	1.33045e+07	7.32108e+06	3.8972e+07
2014-12-26	5.58006e+06	2.07947e+06	1.74384e+06	2.48382e+06	6.43918e+06	1.33056e+07	7.32026e+06	3.89522e+07
2014-12-27	5.5793e+06	2.06011e+06	1.74408e+06	2.48364e+06	6.43925e+06	1.33067e+07	7.31943e+06	3.89325e+07
2014-12-28	5.57854e+06	2.04075e+06	1.74433e+06	2.48346e+06	6.43931e+06	1.33077e+07	7.31859e+06	3.89127e+07
2014-12-29	5.57777e+06	2.02139e+06	1.74457e+06	2.48327e+06	6.43937e+06	1.33087e+07	7.31773e+06	3.88928e+07
2014-12-30	5.577e+06	2.00205e+06	1.74481e+06	2.48308e+06	6.43942e+06	1.33097e+07	7.31685e+06	3.88729e+07
2014-12-31	5.57623e+06	1.98272e+06	1.74504e+06	2.4829e+06	6.43948e+06	1.33107e+07	7.31595e+06	3.8853e+07
2015-01-01	5.57545e+06	1.96342e+06	1.74527e+06	2.48271e+06	6.43953e+06	1.33117e+07	7.31503e+06	3.88331e+07
2015-01-02	5.57468e+06	1.94416e+06	1.7455e+06	2.48252e+06	6.43959e+06	1.33126e+07	7.31408e+06	3.88131e+07
2015-01-03	5.5739e+06	1.92494e+06	1.74572e+06	2.48233e+06	6.43964e+06	1.33136e+07	7.31311e+06	3.87932e+07
2015-01-04	5.57311e+06	1.90576e+06	1.74594e+06	2.48213e+06	6.43969e+06	1.33145e+07	7.31211e+06	3.87732e+07
2015-01-05	5.57233e+06	1.88664e+06	1.74616e+06	2.48194e+06	6.43974e+06	1.33154e+07	7.31108e+06	3.87532e+07
2015-01-06	5.57155e+06	1.86759e+06	1.74637e+06	2.48175e+06	6.43978e+06	1.33162e+07	7.31002e+06	3.87333e+07
2015-01-07	5.57076e+06	1.84861e+06	1.74657e+06	2.48155e+06	6.43983e+06	1.33171e+07	7.30893e+06	3.87133e+07
2015-01-08	5.56998e+06	1.8297e+06	1.74677e+06	2.48136e+06	6.43987e+06	1.33179e+07	7.3078e+06	3.86934e+07
2015-01-09	5.56919e+06	1.81088e+06	1.74697e+06	2.48116e+06	6.43992e+06	1.33187e+07	7.30663e+06	3.86734e+07
2015-01-10	5.56841e+06	1.79215e+06	1.74716e+06	2.48096e+06	6.43996e+06	1.33194e+07	7.30542e+06	3.86535e+07
2015-01-11	5.56763e+06	1.77353e+06	1.74735e+06	2.48076e+06	6.44e+06	1.33202e+07	7.30417e+06	3.86336e+07
2015-01-12	5.56685e+06	1.75501e+06	1.74753e+06	2.48056e+06	6.44004e+06	1.33209e+07	7.30287e+06	3.86137e+07
2015-01-13	5.56607e+06	1.7366e+06	1.7477e+06	2.48036e+06	6.44007e+06	1.33216e+07	7.30153e+06	3.85939e+07
2015-01-14	5.5653e+06	1.71832e+06	1.74787e+06	2.48016e+06	6.44011e+06	1.33222e+07	7.30014e+06	3.85741e+07
2015-01-15	5.56453e+06	1.70016e+06	1.74804e+06	2.47995e+06	6.44014e+06	1.33228e+07	7.29871e+06	3.85544e+07
2015-01-16	5.56376e+06	1.68215e+06	1.7482e+06	2.47975e+06	6.44018e+06	1.33234e+07	7.29722e+06	3.85347e+07
2015-01-17	5.56299e+06	1.66428e+06	1.74835e+06	2.47954e+06	6.44021e+06	1.3324e+07	7.29567e+06	3.8515e+07
2015-01-18	5.56223e+06	1.64656e+06	1.7485e+06	2.47933e+06	6.44024e+06	1.33245e+07	7.29408e+06	3.84954e+07
2015-01-19	5.56148e+06	1.62899e+06	1.74864e+06	2.47913e+06	6.44027e+06	1.3325e+07	7.29242e+06	3.84759e+07
2015-01-20	5.56073e+06	1.6116e+06	1.74877e+06	2.47892e+06	6.44029e+06	1.33254e+07	7.2907e+06	3.84564e+07
2015-01-21	5.55998e+06	1.59438e+06	1.7489e+06	2.47871e+06	6.44032e+06	1.33258e+07	7.28893e+06	3.8437e+07
2015-01-22	5.55924e+06	1.57733e+06	1.74902e+06	2.47849e+06	6.44034e+06	1.33262e+07	7.28709e+06	3.84177e+07
2015-01-23	5.55851e+06	1.56048e+06	1.74913e+06	2.47828e+06	6.44036e+06	1.33265e+07	7.28518e+06	3.83984e+07
2015-01-24	5.55778e+06	1.54382e+06	1.74924e+06	2.47807e+06	6.44038e+06	1.33268e+07	7.28321e+06	3.83793e+07
2015-01-25	5.55706e+06	1.52737e+06	1.74934e+06	2.47785e+06	6.4404e+06	1.3327e+07	7.28117e+06	3.83602e+07
2015-01-26	5.55635e+06	1.51112e+06	1.74943e+06	2.47763e+06	6.44042e+06	1.33272e+07	7.27905e+06	3.83412e+07
2015-01-27	5.55564e+06	1.4951e+06	1.74952e+06	2.47742e+06	6.44044e+06	1.33274e+07	7.27687e+06	3.83224e+07
2015-01-28	5.55495e+06	1.4793e+06	1.74959e+06	2.4772e+06	6.44045e+06	1.33275e+07	7.2746e+06	3.83036e+07
2015-01-29	5.55426e+06	1.46373e+06	1.74966e+06	2.47698e+06	6.44046e+06	1.33276e+07	7.27227e+06	3.82849e+07
2015-01-30	5.55358e+06	1.4484e+06	1.74973e+06	2.47675e+06	6.44047e+06	1.33276e+07	7.26985e+06	3.82664e+07
2015-01-31	5.55291e+06	1.43331e+06	1.74978e+06	2.47652e+06	6.44048e+06	1.33264e+07	7.26735e+06	3.82468e+07
2015-02-01	5.55225e+06	1.41848e+06	1.74983e+06	2.47628e+06	6.44049e+06	1.33229e+07	7.26477e+06	3.8225e+07
2015-02-02	5.5516e+06	1.40392e+06	1.74987e+06	2.47602e+06	6.4405e+06	1.33173e+07	7.2621e+06	3.82013e+07
2015-02-03	5.55096e+06	1.38962e+06	1.7499e+06	2.47575e+06	6.44051e+06	1.33099e+07	7.25935e+06	3.81759e+07
2015-02-04	5.55033e+06	1.37559e+06	1.74992e+06	2.47547e+06	6.44051e+06	1.33006e+07	7.2565e+06	3.8149e+07
2015-02-05	5.54972e+06	1.36186e+06	1.74993e+06	2.47518e+06	6.44051e+06	1.32899e+07	7.25357e+06	3.81206e+07
2015-02-06	5.54911e+06	1.34841e+06	1.74993e+06	2.47489e+06	6.44051e+06	1.32777e+07	7.25054e+06	3.80911e+07
2015-02-07	5.54852e+06	1.33526e+06	1.74993e+06	2.47459e+06	6.44047e+06	1.32644e+07	7.24626e+06	3.80594e+07
2015-02-08	5.54794e+06	1.32241e+06	1.74993e+06	2.47428e+06	6.44035e+06	1.32501e+07	7.23963e+06	3.80246e+07
2015-02-09	5.54737e+06	1.30988e+06	1.74991e+06	2.47398e+06	6.44015e+06	1.32349e+07	7.23081e+06	3.7987e+07
2015-02-10	5.54682e+06	1.29767e+06	1.7499e+06	2.47367e+06	6.43989e+06	1.32191e+07	7.21993e+06	3.7947e+07
2015-02-11	5.54628e+06	1.28579e+06	1.74988e+06	2.47337e+06	6.43956e+06	1.32029e+07	7.20713e+06	3.79049e+07
2015-02-12	5.54575e+06	1.27424e+06	1.74985e+06	2.47307e+06	6.43917e+06	1.31864e+07	7.19256e+06	3.7861e+07
2015-02-13	5.54524e+06	1.26303e+06	1.74982e+06	2.47277e+06	6.43873e+06	1.31698e+07	7.17634e+06	3.78157e+07
2015-02-14	5.54475e+06	1.25218e+06	1.74979e+06	2.47248e+06	6.43825e+06	1.31533e+07	7.15863e+06	3.77693e+07
2015-02-15	5.54427e+06	1.24168e+06	1.74975e+06	2.4722e+06	6.43772e+06	1.31371e+07	7.13955e+06	3.77222e+07
2015-02-16	5.5438e+06	1.23154e+06	1.74971e+06	2.47193e+06	6.43715e+06	1.31206e+07	7.11926e+06	3.76739e+07
2015-02-17	5.54336e+06	1.22178e+06	1.74966e+06	2.47166e+06	6.43655e+06	1.31031e+07	7.09788e+06	3.7624e+07
2015-02-18	5.54293e+06	1.21239e+06	1.74961e+06	2.4714e+06	6.43592e+06	1.30848e+07	7.07556e+06	3.75726e+07
2015-02-19	5.54251e+06	1.20339e+06	1.74956e+06	2.47114e+06	6.43528e+06	1.30656e+07	7.05244e+06	3.75199e+07
2015-02-20	5.54211e+06	1.19479e+06	1.74951e+06	2.47089e+06	6.43461e+06	1.30455e+07	7.02865e+06	3.74661e+07
2015-02-21	5.54174e+06	1.18658e+06	1.74945e+06	2.47064e+06	6.43394e+06	1.30246e+07	7.00434e+06	3.74113e+07
2015-02-22	5.54138e+06	1.17879e+06	1.74939e+06	2.47039e+06	6.43326e+06	1.30028e+07	6.97965e+06	3.73557e+07
2015-02-23	5.54103e+06	1.17141e+06	1.74933e+06	2.47015e+06	6.43258e+06	1.29803e+07	6.95206e+06	3.72968e+07
2015-02-24	5.54071e+06	1.16445e+06	1.74926e+06	2.46991e+06	6.43191e+06	1.29569e+07	6.91934e+06	3.72324e+07
2015-02-25	5.54041e+06	1.15792e+06	1.74919e+06	2.46966e+06	6.43125e+06	1.29327e+07	6.88204e+06	3.71631e+07
2015-02-26	5.54013e+06	1.15184e+06	1.74912e+06	2.46942e+06	6.4306e+06	1.29077e+07	6.84072e+06	3.70895e+07
2015-02-27	5.53986e+06	1.14619e+06	1.74905e+06	2.46918e+06	6.42997e+06	1.2882e+07	6.79594e+06	3.70122e+07
2015-02-28	5.53962e+06	1.141e+06	1.74898e+06	2.46895e+06	6.42937e+06	1.28555e+07	6.74826e+06	3.69317e+07
2015-03-01	5.5394e+06	1.13627e+06	1.7489e+06	2.46871e+06	6.42881e+06	1.28283e+07	6.69822e+06	3.68486e+07
2015-03-02	5.5392e+06	1.132e+06	1.74882e+06	2.46846e+06	6.42828e+06	1.28004e+07	6.64639e+06	3.67636e+07
2015-03-03	5.53902e+06	1.12821e+06	1.74875e+06	2.46822e+06	6.42779e+06	1.27718e+07	6.59332e+06	3.66771e+07
2015-03-04	5.53887e+06	1.1249e+06	1.74867e+06	2.46798e+06	6.42735e+06	1.27426e+07	6.53957e+06	3.65899e+07
2015-03-05	5.53874e+06	1.12208e+06	1.74858e+06	2.46773e+06	6.42696e+06	1.27126e+07	6.4857e+06	3.65024e+07
2015-03-06	5.53863e+06	1.11976e+06	1.7485e+06	2.46748e+06	6.42663e+06	1.26821e+07	6.43226e+06	3.64153e+07
2015-03-07	5.53854e+06	1.11794e+06	1.74842e+06	2.46722e+06	6.42637e+06	1.26508e+07	6.37981e+06	3.63291e+07
2015-03-08	5.53848e+06	1.11663e+06	1.74833e+06	2.46696e+06	6.42617e+06	1.2619e+07	6.3289e+06	3.62445e+07
2015-03-09	5.53844e+06	1.11584e+06	1.74825e+06	2.4667e+06	6.42605e+06	1.25866e+07	6.2801e+06	3.6162e+07
2015-03-10	5.53843e+06	1.11557e+06	1.74816e+06	2.46643e+06	6.42601e+06	1.25536e+07	6.23395e+06	3.60822e+07
2015-03-11	5.53897e+06	1.11676e+06	1.74806e+06	2.46616e+06	6.42613e+06	1.252e+07	6.1888e+06	3.60049e+07
2015-03-12	5.54049e+06	1.12011e+06	1.74793e+06	2.46588e+06	6.42647e+06	1.24859e+07	6.14279e+06	3.59296e+07
2015-03-13	5.54286e+06	1.12531e+06	1.74777e+06	2.46559e+06	6.42699e+06	1.24513e+07	6.09618e+06	3.5856e+07
2015-03-14	5.54596e+06	1.13206e+06	1.74759e+06	2.46529e+06	6.42767e+06	1.24161e+07	6.04921e+06	3.57839e+07
2015-03-15	5.54964e+06	1.14005e+06	1.7474e+06	2.46499e+06	6.42847e+06	1.23805e+07	6.00213e+06	3.57131e+07
2015-03-16	5.55378e+06	1.14897e+06	1.74719e+06	2.46468e+06	6.42936e+06	1.23443e+07	5.9552e+06	3.56435e+07
2015-03-17	5.55824e+06	1.1585e+06	1.74699e+06	2.46436e+06	6.43032e+06	1.23077e+07	5.90866e+06	3.55748e+07
2015-03-18	5.56289e+06	1.16835e+06	1.74678e+06	2.46403e+06	6.43131e+06	1.22706e+07	5.86276e+06	3.55067e+07
2015-03-19	5.56759e+06	1.17819e+06	1.74657e+06	2.46369e+06	6.4323e+06	1.22331e+07	5.81776e+06	3.54392e+07
2015-03-20	5.57222e+06	1.18773e+06	1.74638e+06	2.4633e+06	6.43326e+06	1.21944e+07	5.7739e+06	3.53712e+07
2015-03-21	5.57664e+06	1.19664e+06	1.74621e+06	2.46285e+06	6.43415e+06	1.21536e+07	5.73143e+06	3.53015e+07
2015-03-22	5.58071e+06	1.20463e+06	1.74605e+06	2.46234e+06	6.43495e+06	1.21109e+07	5.69061e+06	3.52302e+07
2015-03-23	5.58432e+06	1.21138e+06	1.74592e+06	2.46178e+06	6.43563e+06	1.20663e+07	5.65169e+06	3.5157e+07
2015-03-24	5.58731e+06	1.21659e+06	1.74582e+06	2.46119e+06	6.43615e+06	1.20199e+07	5.6149e+06	3.50819e+07
2015-03-25	5.58956e+06	1.21994e+06	1.74576e+06	2.46059e+06	6.43649e+06	1.19717e+07	5.58052e+06	3.50046e+07
2015-03-26	5.59094e+06	1.22112e+06	1.74573e+06	2.45998e+06	6.43661e+06	1.19219e+07	5.54878e+06	3.49251e+07
2015-03-27	5.59183e+06	1.22066e+06	1.74573e+06	2.45938e+06	6.43661e+06	1.18704e+07	5.51885e+06	3.48435e+07
2015-03-28	5.59268e+06	1.21932e+06	1.74573e+06	2.4588e+06	6.43661e+06	1.18174e+07	5.48972e+06	3.47603e+07
2015-03-29	5.5935e+06	1.21718e+06	1.74573e+06	2.45826e+06	6.43661e+06	1.17629e+07	5.46135e+06	3.46755e+07
2015-03-30	5.59427e+06	1.21432e+06	1.74573e+06	2.45776e+06	6.43661e+06	1.1707e+07	5.43372e+06	3.45894e+07
2015-03-31	5.595e+06	1.21079e+06	1.74573e+06	2.45732e+06	6.43661e+06	1.16497e+07	5.40679e+06	3.4502e+07
2015-04-01	5.59569e+06	1.20668e+06	1.74573e+06	2.45696e+06	6.43661e+06	1.15912e+07	5.38053e+06	3.44134e+07
2015-04-02	5.59633e+06	1.20205e+06	1.74573e+06	2.45669e+06	6.43661e+06	1.15314e+07	5.35492e+06	3.43238e+07
2015-04-03	5.59691e+06	1.19699e+06	1.74573e+06	2.45651e+06	6.43661e+06	1.14705e+07	5.32993e+06	3.42332e+07
2015-04-04	5.59744e+06	1.19156e+06	1.74573e+06	2.45645e+06	6.43661e+06	1.14085e+07	5.30552e+06	3.41419e+07
2015-04-05	5.59791e+06	1.18584e+06	1.74573e+06	2.45645e+06	6.43661e+06	1.13421e+07	5.28167e+06	3.40463e+07
2015-04-06	5.59832e+06	1.1799e+06	1.74573e+06	2.45645e+06	6.43661e+06	1.12686e+07	5.25834e+06	3.39439e+07
2015-04-07	5.59866e+06	1.17381e+06	1.74573e+06	2.45645e+06	6.43661e+06	1.11891e+07	5.23551e+06	3.38358e+07
2015-04-08	5.59893e+06	1.16765e+06	1.74573e+06	2.45645e+06	6.43661e+06	1.11048e+07	5.21315e+06	3.37233e+07
2015-04-09	5.59912e+06	1.16148e+06	1.74573e+06	2.45645e+06	6.43661e+06	1.10169e+07	5.19122e+06	3.36075e+07
2015-04-10	5.59924e+06	1.15538e+06	1.74573e+06	2.45645e+06	6.43661e+06	1.09265e+07	5.1697e+06	3.34896e+07
2015-04-11	5.59929e+06	1.14943e+06	1.74573e+06	2.45645e+06	6.43661e+06	1.08347e+07	5.14856e+06	3.33708e+07
2015-04-12	5.59929e+06	1.143e+06	1.74573e+06	2.45645e+06	6.43661e+06	1.07427e+07	5.12777e+06	3.32516e+07
2015-04-13	5.59929e+06	1.13553e+06	1.74573e+06	2.45645e+06	6.43661e+06	1.06517e+07	5.1073e+06	3.31326e+07
2015-04-14	5.59929e+06	1.12718e+06	1.74573e+06	2.45645e+06	6.43661e+06	1.05628e+07	5.08711e+06	3.30152e+07
2015-04-15	5.59929e+06	1.11813e+06	1.74573e+06	2.45645e+06	6.43661e+06	1.04771e+07	5.06718e+06	3.29005e+07
2015-04-16	5.59929e+06	1.10854e+06	1.74573e+06	2.45645e+06	6.43661e+06	1.03958e+07	5.04749e+06	3.27899e+07
2015-04-17	5.59929e+06	1.09856e+06	1.74573e+06	2.45645e+06	6.43661e+06	1.03201e+07	5.02799e+06	3.26847e+07
2015-04-18	5.59929e+06	1.08838e+06	1.74573e+06	2.45645e+06	6.43661e+06	1.02511e+07	5.00866e+06	3.25862e+07
2015-04-19	5.59929e+06	1.07814e+06	1.74573e+06	2.45645e+06	6.43661e+06	1.01899e+07	4.98947e+06	3.24956e+07
2015-04-20	5.59929e+06	1.06801e+06	1.74573e+06	2.45645e+06	6.43661e+06	1.01377e+07	4.97039e+06	3.24142e+07
2015-04-21	5.59929e+06	1.05816e+06	1.74573e+06	2.45645e+06	6.43661e+06	1.00918e+07	4.95139e+06	3.23394e+07
2015-04-22	5.59929e+06	1.04876e+06	1.74573e+06	2.45645e+06	6.43661e+06	1.00485e+07	4.93245e+06	3.22678e+07
2015-04-23	5.59929e+06	1.03996e+06	1.74573e+06	2.45645e+06	6.43661e+06	1.00076e+07	4.91352e+06	3.21992e+07
2015-04-24	5.59929e+06	1.03193e+06	1.74573e+06	2.45645e+06	6.43661e+06	9.96899e+06	4.89459e+06	3.21336e+07
2015-04-25	5.59929e+06	1.02484e+06	1.74573e+06	2.45645e+06	6.43661e+06	9.93234e+06	4.87561e+06	3.20709e+07
2015-04-26	5.59929e+06	1.01885e+06	1.74573e+06	2.45645e+06	6.43661e+06	9.89747e+06	4.85657e+06	3.2011e+07
2015-04-27	5.59929e+06	1.01412e+06	1.74573e+06	2.45645e+06	6.43661e+06	9.86415e+06	4.83743e+06	3.19538e+07
2015-04-28	5.59929e+06	1.0101e+06	1.7457e+06	2.45645e+06	6.43661e+06	9.83217e+06	4.81908e+06	3.18994e+07
2015-04-29	5.59929e+06	1.00612e+06	1.7456e+06	2.45645e+06	6.43661e+06	9.80132e+06	4.80224e+06	3.18476e+07
2015-04-30	5.59929e+06	1.00221e+06	1.74545e+06	2.45645e+06	6.43661e+06	9.77137e+06	4.7866e+06	3.1798e+07
2015-05-01	5.59929e+06	998408	1.74524e+06	2.45645e+06	6.43661e+06	9.74212e+06	4.77189e+06	3.175e+07
2015-05-02	5.59929e+06	994739	1.74499e+06	2.45645e+06	6.43661e+06	9.71333e+06	4.7578e+06	3.17032e+07
2015-05-03	5.59929e+06	991233	1.74469e+06	2.45645e+06	6.43661e+06	9.68481e+06	4.74404e+06	3.16571e+07
2015-05-04	5.59929e+06	987920	1.74435e+06	2.45645e+06	6.43661e+06	9.65632e+06	4.73033e+06	3.16113e+07
2015-05-05	5.59929e+06	984830	1.74398e+06	2.45645e+06	6.43661e+06	9.62765e+06	4.71636e+06	3.15652e+07
2015-05-06	5.59929e+06	981993	1.74359e+06	2.45645e+06	6.43661e+06	9.59859e+06	4.70185e+06	3.15184e+07
2015-05-07	5.59929e+06	979437	1.74317e+06		6.43661e+06	9.57064e+06	4.68651e+06	NA
2015-05-08	5.59929e+06	977193	1.74274e+06		6.43661e+06	9.54513e+06	4.67003e+06	NA
2015-05-09	5.59929e+06	975291	1.74229e+06		6.43661e+06	9.5216e+06	4.65213e+06	NA
2015-05-10	5.59929e+06	973760	1.74184e+06		6.43661e+06	9.49958e+06	4.63252e+06	NA
2015-05-11	5.59929e+06	972629	1.74138e+06		6.43661e+06	9.4786e+06	4.6109e+06	NA
2015-05-12	5.59929e+06	971929	1.74093e+06		6.43661e+06	9.4582e+06	4.58699e+06	NA
2015-05-13	5.59929e+06	971689	1.74049e+06		6.43661e+06	9.4379e+06	4.56048e+06	NA
2015-05-14	5.59929e+06	971689				9.41725e+06	4.52359e+06	NA
2015-05-15	5.59929e+06	971689				9.39577e+06	4.4704e+06	NA
2015-05-16	5.59929e+06	971689				9.373e+06	4.4034e+06	NA
2015-05-17	5.59929e+06	971689				9.34848e+06	4.32508e+06	NA
2015-05-18	5.59929e+06	971689				9.32172e+06	4.23793e+06	NA
2015-05-19	5.59929e+06	971689				9.29228e+06	4.14446e+06	NA
2015-05-20	5.59929e+06	971689				9.25967e+06	4.04714e+06	NA
2015-05-21	5.59929e+06	971689				9.22344e+06	3.94848e+06	NA
2015-05-22	5.59929e+06	971689				9.18311e+06	3.85096e+06	NA
2015-05-23	5.59929e+06	971689				9.12537e+06	3.75709e+06	NA
2015-05-24	5.59929e+06	971689				9.04e+06	3.66935e+06	NA
2015-05-25	5.59929e+06	971689				8.93122e+06	3.59024e+06	NA
2015-05-26	5.59929e+06	971689				8.80326e+06	3.52224e+06	NA
2015-05-27	5.59929e+06	971689				8.66031e+06	3.46786e+06	NA
2015-05-28	5.59929e+06	971689				8.5066e+06	3.42959e+06	NA
2015-05-29	5.59929e+06	971689				8.34634e+06	3.40991e+06	NA
2015-05-30	5.59929e+06	971689				8.18374e+06	3.40051e+06	NA
2015-05-31	5.59929e+06	971689				8.02302e+06	3.39141e+06	NA
2015-06-01	5.59929e+06	971689				7.86839e+06	3.38259e+06	NA
2015-06-02	5.59929e+06	971689				7.72407e+06	3.37405e+06	NA
2015-06-03	5.59929e+06	971689				7.59427e+06	3.36579e+06	NA
2015-06-04	5.59929e+06	971689				7.48321e+06	3.3578e+06	NA
2015-06-05	5.59929e+06	971689				7.3951e+06	3.35008e+06	NA
2015-06-06	5.59929e+06	971689				7.33415e+06	3.34262e+06	NA
2015-06-07	5.59929e+06	971689				7.30458e+06	3.33542e+06	NA
2015-06-08	5.59929e+06	971689				7.29227e+06	3.32847e+06	NA
2015-06-09	5.59929e+06	971689				7.28031e+06	3.32177e+06	NA
2015-06-10	5.59929e+06	971689				7.26869e+06	3.31531e+06	NA
2015-06-11	5.59929e+06	971689				7.25741e+06	3.30909e+06	NA
2015-06-12	5.59929e+06	971689				7.24646e+06	3.3031e+06	NA
2015-06-13	5.59929e+06	971689				7.23583e+06	3.29734e+06	NA
2015-06-14	5.59929e+06	971689				7.22553e+06	3.2918e+06	NA
2015-06-15	5.59929e+06	971689				7.21556e+06	3.28648e+06	NA
2015-06-16	5.59929e+06	971689				7.2059e+06	3.28137e+06	NA
2015-06-17	5.59929e+06	971689				7.19655e+06	3.27647e+06	NA
2015-06-18	5.59929e+06	971689				7.18752e+06	3.27178e+06	NA
2015-06-19	5.59929e+06	971689				7.17879e+06	3.26728e+06	NA
2015-06-20	5.59929e+06	971689				7.17037e+06	3.26298e+06	NA
2015-06-21	5.59929e+06	971689				7.16225e+06	3.25886e+06	NA
2015-06-22	5.59929e+06	971689				7.15442e+06	3.25493e+06	NA
2015-06-23	5.59929e+06	971689				7.14689e+06	3.25118e+06	NA
2015-06-24	5.59929e+06	971689				7.13964e+06	3.24761e+06	NA
2015-06-25	5.59929e+06	971689				7.13268e+06	3.2442e+06	NA
2015-06-26	5.59929e+06	971689				7.126e+06	3.24095e+06	NA
2015-06-27	5.59929e+06	971689				7.1196e+06	3.23787e+06	NA
2015-06-28	5.59929e+06	971689				7.11348e+06	3.23494e+06	NA
2015-06-29	5.59929e+06	971689				7.10762e+06	3.23215e+06	NA
2015-06-30	5.59929e+06	971689				7.10203e+06	3.22952e+06	NA
2015-07-01	5.59929e+06	971689				7.09671e+06	3.22702e+06	NA
2015-07-02	5.59929e+06	971689				7.09164e+06	3.22466e+06	NA
2015-07-03	5.59929e+06	971689				7.08683e+06	3.22243e+06	NA
2015-07-04	5.59929e+06	971689				7.08228e+06	3.22032e+06	NA
2015-07-05	5.59929e+06	971689				7.07797e+06	3.21833e+06	NA
2015-07-06	5.59929e+06	971689				7.07391e+06	3.21646e+06	NA
2015-07-07	5.59929e+06	971689				7.07009e+06	3.21469e+06	NA
2015-07-08	5.59929e+06	971689				7.06651e+06	3.21304e+06	NA
2015-07-09	5.59929e+06	971689				7.06316e+06	3.21148e+06	NA
2015-07-10	5.59929e+06	971689				7.06005e+06	3.21002e+06	NA
2015-07-11	5.59929e+06	971689				7.05716e+06	3.20865e+06	NA
2015-07-12	5.59929e+06	971689				7.0545e+06	3.20736e+06	NA
2015-07-13	5.59929e+06	971689				7.05205e+06	3.20616e+06	NA
2015-07-14	5.59929e+06	971689				7.04982e+06	3.20503e+06	NA
2015-07-15	5.59929e+06	971689				7.04781e+06	3.20397e+06	NA
2015-07-16	5.59929e+06	971689				7.046e+06	3.20298e+06	NA
2015-07-17						7.0444e+06	3.20203e+06	NA
2015-07-18						7.043e+06	3.20109e+06	NA
2015-07-19						7.0418e+06	3.20017e+06	NA
2015-07-20						7.04079e+06	3.19928e+06	NA
2015-07-21						7.03998e+06	3.19842e+06	NA
2015-07-22						7.03935e+06	3.1976e+06	NA
2015-07-23						7.03891e+06	3.19684e+06	NA
2015-07-24						7.03864e+06	3.19612e+06	NA
2015-07-25						7.03856e+06	3.19547e+06	NA
2015-07-26							3.19488e+06	NA
2015-07-27							3.19436e+06	NA
2015-07-28							3.19392e+06	NA
2015-07-29							3.19357e+06	NA
2015-07-30							3.19332e+06	NA
2015-07-31							3.19316e+06	NA
2015-08-01							3.1931e+06	NA

## Sheet: AggregatedData
Interpolated Dates	Total Land Area (m^2)	Total Reef Area (m^2)	Total Land Area (km^2)	Total Reef Area (km^2)
2014-02-05	138168	4.31172e+07	0.138168	43.1172
2014-02-06	138818	4.31153e+07	0.138818	43.1153
2014-02-07	139499	4.31133e+07	0.139499	43.1133
2014-02-08	140215	4.31113e+07	0.140215	43.1113
2014-02-09	140971	4.31093e+07	0.140971	43.1093
2014-02-10	141772	4.31072e+07	0.141772	43.1072
2014-02-11	142621	4.3105e+07	0.142621	43.105
2014-02-12	143524	4.31028e+07	0.143524	43.1028
2014-02-13	144485	4.31005e+07	0.144485	43.1005
2014-02-14	145508	4.30981e+07	0.145508	43.0981
2014-02-15	146598	4.30956e+07	0.146598	43.0956
2014-02-16	147759	4.3093e+07	0.147759	43.093
2014-02-17	148997	4.30904e+07	0.148997	43.0904
2014-02-18	150314	4.30877e+07	0.150314	43.0877
2014-02-19	151717	4.30849e+07	0.151717	43.0849
2014-02-20	153594	4.30816e+07	0.153594	43.0816
2014-02-21	156250	4.30775e+07	0.15625	43.0775
2014-02-22	159560	4.30727e+07	0.15956	43.0727
2014-02-23	163401	4.30674e+07	0.163401	43.0674
2014-02-24	167649	4.30617e+07	0.167649	43.0617
2014-02-25	172179	4.30557e+07	0.172179	43.0557
2014-02-26	176868	4.30495e+07	0.176868	43.0495
2014-02-27	181591	4.30433e+07	0.181591	43.0433
2014-02-28	186225	4.30372e+07	0.186225	43.0372
2014-03-01	190683	4.30312e+07	0.190683	43.0312
2014-03-02	194878	4.30254e+07	0.194878	43.0254
2014-03-03	198683	4.302e+07	0.198683	43.02
2014-03-04	201973	4.30151e+07	0.201973	43.0151
2014-03-05	204620	4.30107e+07	0.20462	43.0107
2014-03-06	206500	4.30071e+07	0.2065	43.0071
2014-03-07	207486	4.30044e+07	0.207486	43.0044
2014-03-08	208011	4.3002e+07	0.208011	43.002
2014-03-09	208589	4.29996e+07	0.208589	42.9996
2014-03-10	209220	4.29972e+07	0.20922	42.9972
2014-03-11	209900	4.29947e+07	0.2099	42.9947
2014-03-12	210628	4.29921e+07	0.210628	42.9921
2014-03-13	211402	4.29894e+07	0.211402	42.9894
2014-03-14	212220	4.29867e+07	0.21222	42.9867
2014-03-15	213080	4.2984e+07	0.21308	42.984
2014-03-16	213979	4.29812e+07	0.213979	42.9812
2014-03-17	214917	4.29784e+07	0.214917	42.9784
2014-03-18	215890	4.29755e+07	0.21589	42.9755
2014-03-19	216898	4.29726e+07	0.216898	42.9726
2014-03-20	217937	4.29697e+07	0.217937	42.9697
2014-03-21	219007	4.29667e+07	0.219007	42.9667
2014-03-22	220104	4.29638e+07	0.220104	42.9638
2014-03-23	221227	4.29608e+07	0.221227	42.9608
2014-03-24	222374	4.29577e+07	0.222374	42.9577
2014-03-25	223543	4.29547e+07	0.223543	42.9547
2014-03-26	224732	4.29517e+07	0.224732	42.9517
2014-03-27	225939	4.29486e+07	0.225939	42.9486
2014-03-28	227162	4.29456e+07	0.227162	42.9456
2014-03-29	228399	4.29426e+07	0.228399	42.9426
2014-03-30	229648	4.29396e+07	0.229648	42.9396
2014-03-31	230907	4.29365e+07	0.230907	42.9365
2014-04-01	232174	4.29335e+07	0.232174	42.9335
2014-04-02	233690	4.29304e+07	0.23369	42.9304
2014-04-03	235675	4.29268e+07	0.235675	42.9268
2014-04-04	238093	4.2923e+07	0.238093	42.923
2014-04-05	240912	4.29189e+07	0.240912	42.9189
2014-04-06	244095	4.29144e+07	0.244095	42.9144
2014-04-07	247610	4.29098e+07	0.24761	42.9098
2014-04-08	251422	4.29049e+07	0.251422	42.9049
2014-04-09	255807	4.28996e+07	0.255807	42.8996
2014-04-10	261006	4.28936e+07	0.261006	42.8936
2014-04-11	266931	4.2887e+07	0.266931	42.887
2014-04-12	273491	4.28798e+07	0.273491	42.8798
2014-04-13	280597	4.28723e+07	0.280597	42.8723
2014-04-14	288161	4.28644e+07	0.288161	42.8644
2014-04-15	296092	4.28563e+07	0.296092	42.8563
2014-04-16	304302	4.2848e+07	0.304302	42.848
2014-04-17	312701	4.28397e+07	0.312701	42.8397
2014-04-18	321199	4.28314e+07	0.321199	42.8314
2014-04-19	329708	4.28232e+07	0.329708	42.8232
2014-04-20	338139	4.28152e+07	0.338139	42.8152
2014-04-21	346401	4.28075e+07	0.346401	42.8075
2014-04-22	354406	4.28002e+07	0.354406	42.8002
2014-04-23	362064	4.27933e+07	0.362064	42.7933
2014-04-24	369286	4.2787e+07	0.369286	42.787
2014-04-25	376150	4.27811e+07	0.37615	42.7811
2014-04-26	382763	4.27755e+07	0.382763	42.7755
2014-04-27	389075	4.27702e+07	0.389075	42.7702
2014-04-28	395039	4.27652e+07	0.395039	42.7652
2014-04-29	400606	4.27606e+07	0.400606	42.7606
2014-04-30	405730	4.27563e+07	0.40573	42.7563
2014-05-01	410361	4.27525e+07	0.410361	42.7525
2014-05-02	414451	4.2749e+07	0.414451	42.749
2014-05-03	417953	4.2746e+07	0.417953	42.746
2014-05-04	421121	4.27432e+07	0.421121	42.7432
2014-05-05	424232	4.27404e+07	0.424232	42.7404
2014-05-06	427273	4.27376e+07	0.427273	42.7376
2014-05-07	430228	4.27347e+07	0.430228	42.7347
2014-05-08	433086	4.27319e+07	0.433086	42.7319
2014-05-09	435832	4.2729e+07	0.435832	42.729
2014-05-10	438453	4.27261e+07	0.438453	42.7261
2014-05-11	440960	4.27231e+07	0.44096	42.7231
2014-05-12	443382	4.27202e+07	0.443382	42.7202
2014-05-13	445729	4.27173e+07	0.445729	42.7173
2014-05-14	448016	4.27143e+07	0.448016	42.7143
2014-05-15	450253	4.27114e+07	0.450253	42.7114
2014-05-16	452454	4.27084e+07	0.452454	42.7084
2014-05-17	454631	4.27054e+07	0.454631	42.7054
2014-05-18	456796	4.27024e+07	0.456796	42.7024
2014-05-19	458961	4.26993e+07	0.458961	42.6993
2014-05-20	461138	4.26962e+07	0.461138	42.6962
2014-05-21	463340	4.26931e+07	0.46334	42.6931
2014-05-22	465580	4.269e+07	0.46558	42.69
2014-05-23	467869	4.26868e+07	0.467869	42.6868
2014-05-24	470219	4.26836e+07	0.470219	42.6836
2014-05-25	472644	4.26803e+07	0.472644	42.6803
2014-05-26	475154	4.2677e+07	0.475154	42.677
2014-05-27	477796	4.26735e+07	0.477796	42.6735
2014-05-28	480602	4.26698e+07	0.480602	42.6698
2014-05-29	483569	4.26659e+07	0.483569	42.6659
2014-05-30	486691	4.26618e+07	0.486691	42.6618
2014-05-31	489964	4.26575e+07	0.489964	42.6575
2014-06-01	493384	4.26529e+07	0.493384	42.6529
2014-06-02	496947	4.26482e+07	0.496947	42.6482
2014-06-03	500648	4.26433e+07	0.500648	42.6433
2014-06-04	504483	4.26382e+07	0.504483	42.6382
2014-06-05	508447	4.26329e+07	0.508447	42.6329
2014-06-06	512537	4.26274e+07	0.512537	42.6274
2014-06-07	516747	4.26218e+07	0.516747	42.6218
2014-06-08	521073	4.2616e+07	0.521073	42.616
2014-06-09	525511	4.261e+07	0.525511	42.61
2014-06-10	530057	4.26039e+07	0.530057	42.6039
2014-06-11	534707	4.25977e+07	0.534707	42.5977
2014-06-12	539455	4.25913e+07	0.539455	42.5913
2014-06-13	544297	4.25848e+07	0.544297	42.5848
2014-06-14	549229	4.25782e+07	0.549229	42.5782
2014-06-15	554248	4.25715e+07	0.554248	42.5715
2014-06-16	559347	4.25646e+07	0.559347	42.5646
2014-06-17	564524	4.25576e+07	0.564524	42.5576
2014-06-18	569773	4.25506e+07	0.569773	42.5506
2014-06-19	575090	4.25434e+07	0.57509	42.5434
2014-06-20	580471	4.25362e+07	0.580471	42.5362
2014-06-21	585911	4.25288e+07	0.585911	42.5288
2014-06-22	591407	4.25214e+07	0.591407	42.5214
2014-06-23	596953	4.2514e+07	0.596953	42.514
2014-06-24	602546	4.25064e+07	0.602546	42.5064
2014-06-25	608180	4.24988e+07	0.60818	42.4988
2014-06-26	613852	4.24912e+07	0.613852	42.4912
2014-06-27	619558	4.24835e+07	0.619558	42.4835
2014-06-28	625292	4.24757e+07	0.625292	42.4757
2014-06-29	631050	4.2468e+07	0.63105	42.468
2014-06-30	636829	4.24602e+07	0.636829	42.4602
2014-07-01	642623	4.24523e+07	0.642623	42.4523
2014-07-02	648428	4.24445e+07	0.648428	42.4445
2014-07-03	654241	4.24367e+07	0.654241	42.4367
2014-07-04	660056	4.24288e+07	0.660056	42.4288
2014-07-05	665869	4.2421e+07	0.665869	42.421
2014-07-06	671676	4.24131e+07	0.671676	42.4131
2014-07-07	677473	4.24053e+07	0.677473	42.4053
2014-07-08	683254	4.23975e+07	0.683254	42.3975
2014-07-09	689017	4.23897e+07	0.689017	42.3897
2014-07-10	694755	4.2382e+07	0.694755	42.382
2014-07-11	700466	4.23743e+07	0.700466	42.3743
2014-07-12	706144	4.23666e+07	0.706144	42.3666
2014-07-13	711785	4.2359e+07	0.711785	42.359
2014-07-14	717385	4.23515e+07	0.717385	42.3515
2014-07-15	722939	4.2344e+07	0.722939	42.344
2014-07-16	728444	4.23365e+07	0.728444	42.3365
2014-07-17	733894	4.23292e+07	0.733894	42.3292
2014-07-18	739285	4.23219e+07	0.739285	42.3219
2014-07-19	744614	4.23148e+07	0.744614	42.3148
2014-07-20	749874	4.23077e+07	0.749874	42.3077
2014-07-21	755064	4.23007e+07	0.755064	42.3007
2014-07-22	760176	4.22938e+07	0.760176	42.2938
2014-07-23	765209	4.2287e+07	0.765209	42.287
2014-07-24	770156	4.22804e+07	0.770156	42.2804
2014-07-25	775014	4.22739e+07	0.775014	42.2739
2014-07-26	779778	4.22675e+07	0.779778	42.2675
2014-07-27	784445	4.22612e+07	0.784445	42.2612
2014-07-28	789008	4.22551e+07	0.789008	42.2551
2014-07-29	793465	4.22491e+07	0.793465	42.2491
2014-07-30	797811	4.22433e+07	0.797811	42.2433
2014-07-31	802041	4.22376e+07	0.802041	42.2376
2014-08-01	806151	4.22321e+07	0.806151	42.2321
2014-08-02	810137	4.22268e+07	0.810137	42.2268
2014-08-03	813994	4.22217e+07	0.813994	42.2217
2014-08-04	817719	4.22167e+07	0.817719	42.2167
2014-08-05	821305	4.22119e+07	0.821305	42.2119
2014-08-06	824750	4.22074e+07	0.82475	42.2074
2014-08-07	828048	4.2203e+07	0.828048	42.203
2014-08-08	831196	4.21988e+07	0.831196	42.1988
2014-08-09	834189	4.21949e+07	0.834189	42.1949
2014-08-10	837023	4.21911e+07	0.837023	42.1911
2014-08-11	839693	4.21876e+07	0.839693	42.1876
2014-08-12	842195	4.21844e+07	0.842195	42.1844
2014-08-13	844524	4.21813e+07	0.844524	42.1813
2014-08-14	846677	4.21785e+07	0.846677	42.1785
2014-08-15	848733	4.21759e+07	0.848733	42.1759
2014-08-16	851064	4.21729e+07	0.851064	42.1729
2014-08-17	853952	4.21691e+07	0.853952	42.1691
2014-08-18	857390	4.21645e+07	0.85739	42.1645
2014-08-19	861367	4.21591e+07	0.861367	42.1591
2014-08-20	865873	4.21529e+07	0.865873	42.1529
2014-08-21	870901	4.21459e+07	0.870901	42.1459
2014-08-22	876441	4.21382e+07	0.876441	42.1382
2014-08-23	882483	4.21298e+07	0.882483	42.1298
2014-08-24	889018	4.21206e+07	0.889018	42.1206
2014-08-25	896038	4.21108e+07	0.896038	42.1108
2014-08-26	903534	4.21002e+07	0.903534	42.1002
2014-08-27	911495	4.20889e+07	0.911495	42.0889
2014-08-28	919913	4.2077e+07	0.919913	42.077
2014-08-29	928779	4.20643e+07	0.928779	42.0643
2014-08-30	938082	4.20511e+07	0.938082	42.0511
2014-08-31	947814	4.20372e+07	0.947814	42.0372
2014-09-01	957966	4.20226e+07	0.957966	42.0226
2014-09-02	968528	4.20075e+07	0.968528	42.0075
2014-09-03	979491	4.19917e+07	0.979491	41.9917
2014-09-04	990846	4.19754e+07	0.990846	41.9754
2014-09-05	1.00258e+06	4.19584e+07	1.00258	41.9584
2014-09-06	1.01469e+06	4.19409e+07	1.01469	41.9409
2014-09-07	1.02717e+06	4.19229e+07	1.02717	41.9229
2014-09-08	1.04e+06	4.19043e+07	1.04	41.9043
2014-09-09	1.05317e+06	4.18852e+07	1.05317	41.8852
2014-09-10	1.06668e+06	4.18655e+07	1.06668	41.8655
2014-09-11	1.08052e+06	4.18454e+07	1.08052	41.8454
2014-09-12	1.09467e+06	4.18247e+07	1.09467	41.8247
2014-09-13	1.10913e+06	4.18036e+07	1.10913	41.8036
2014-09-14	1.12389e+06	4.1782e+07	1.12389	41.782
2014-09-15	1.13894e+06	4.176e+07	1.13894	41.76
2014-09-16	1.15427e+06	4.17375e+07	1.15427	41.7375
2014-09-17	1.16988e+06	4.17145e+07	1.16988	41.7145
2014-09-18	1.18574e+06	4.16912e+07	1.18574	41.6912
2014-09-19	1.20186e+06	4.16674e+07	1.20186	41.6674
2014-09-20	1.21821e+06	4.16433e+07	1.21821	41.6433
2014-09-21	1.23481e+06	4.16187e+07	1.23481	41.6187
2014-09-22	1.25162e+06	4.15938e+07	1.25162	41.5938
2014-09-23	1.26866e+06	4.15686e+07	1.26866	41.5686
2014-09-24	1.2859e+06	4.1543e+07	1.2859	41.543
2014-09-25	1.30333e+06	4.15164e+07	1.30333	41.5164
2014-09-26	1.32095e+06	4.14883e+07	1.32095	41.4883
2014-09-27	1.33875e+06	4.14587e+07	1.33875	41.4587
2014-09-28	1.35672e+06	4.14278e+07	1.35672	41.4278
2014-09-29	1.37485e+06	4.13956e+07	1.37485	41.3956
2014-09-30	1.39312e+06	4.13623e+07	1.39312	41.3623
2014-10-01	1.41154e+06	4.13279e+07	1.41154	41.3279
2014-10-02	1.43012e+06	4.12925e+07	1.43012	41.2925
2014-10-03	1.44887e+06	4.12561e+07	1.44887	41.2561
2014-10-04	1.46779e+06	4.12189e+07	1.46779	41.2189
2014-10-05	1.48687e+06	4.1181e+07	1.48687	41.181
2014-10-06	1.5061e+06	4.11424e+07	1.5061	41.1424
2014-10-07	1.52548e+06	4.11032e+07	1.52548	41.1032
2014-10-08	1.54499e+06	4.10636e+07	1.54499	41.0636
2014-10-09	1.56463e+06	4.10236e+07	1.56463	41.0236
2014-10-10	1.58439e+06	4.09834e+07	1.58439	40.9834
2014-10-11	1.60427e+06	4.09429e+07	1.60427	40.9429
2014-10-12	1.62425e+06	4.09024e+07	1.62425	40.9024
2014-10-13	1.64433e+06	4.08619e+07	1.64433	40.8619
2014-10-14	1.6645e+06	4.08215e+07	1.6645	40.8215
2014-10-15	1.68475e+06	4.07813e+07	1.68475	40.7813
2014-10-16	1.70507e+06	4.07415e+07	1.70507	40.7415
2014-10-17	1.72546e+06	4.0702e+07	1.72546	40.702
2014-10-18	1.7459e+06	4.06629e+07	1.7459	40.6629
2014-10-19	1.7664e+06	4.06245e+07	1.7664	40.6245
2014-10-20	1.78694e+06	4.05868e+07	1.78694	40.5868
2014-10-21	1.80752e+06	4.05498e+07	1.80752	40.5498
2014-10-22	1.82812e+06	4.05137e+07	1.82812	40.5137
2014-10-23	1.84874e+06	4.04786e+07	1.84874	40.4786
2014-10-24	1.86937e+06	4.04445e+07	1.86937	40.4445
2014-10-25	1.89e+06	4.04116e+07	1.89	40.4116
2014-10-26	1.91063e+06	4.03799e+07	1.91063	40.3799
2014-10-27	1.93125e+06	4.03489e+07	1.93125	40.3489
2014-10-28	1.95184e+06	4.0318e+07	1.95184	40.318
2014-10-29	1.97241e+06	4.02873e+07	1.97241	40.2873
2014-10-30	1.99294e+06	4.02567e+07	1.99294	40.2567
2014-10-31	2.01342e+06	4.02262e+07	2.01342	40.2262
2014-11-01	2.03385e+06	4.01959e+07	2.03385	40.1959
2014-11-02	2.05422e+06	4.01657e+07	2.05422	40.1657
2014-11-03	2.07452e+06	4.01358e+07	2.07452	40.1358
2014-11-04	2.09475e+06	4.0106e+07	2.09475	40.106
2014-11-05	2.11489e+06	4.00765e+07	2.11489	40.0765
2014-11-06	2.13493e+06	4.00471e+07	2.13493	40.0471
2014-11-07	2.15488e+06	4.0018e+07	2.15488	40.018
2014-11-08	2.17472e+06	3.99891e+07	2.17472	39.9891
2014-11-09	2.19444e+06	3.99605e+07	2.19444	39.9605
2014-11-10	2.21404e+06	3.99322e+07	2.21404	39.9322
2014-11-11	2.23351e+06	3.99042e+07	2.23351	39.9042
2014-11-12	2.25283e+06	3.98764e+07	2.25283	39.8764
2014-11-13	2.27201e+06	3.9849e+07	2.27201	39.849
2014-11-14	2.29103e+06	3.98219e+07	2.29103	39.8219
2014-11-15	2.30989e+06	3.97951e+07	2.30989	39.7951
2014-11-16	2.32858e+06	3.97687e+07	2.32858	39.7687
2014-11-17	2.34709e+06	3.97426e+07	2.34709	39.7426
2014-11-18	2.36541e+06	3.97169e+07	2.36541	39.7169
2014-11-19	2.38353e+06	3.96916e+07	2.38353	39.6916
2014-11-20	2.40146e+06	3.96667e+07	2.40146	39.6667
2014-11-21	2.41917e+06	3.96423e+07	2.41917	39.6423
2014-11-22	2.43666e+06	3.96182e+07	2.43666	39.6182
2014-11-23	2.45392e+06	3.95946e+07	2.45392	39.5946
2014-11-24	2.47095e+06	3.95714e+07	2.47095	39.5714
2014-11-25	2.48774e+06	3.95487e+07	2.48774	39.5487
2014-11-26	2.50428e+06	3.95265e+07	2.50428	39.5265
2014-11-27	2.52056e+06	3.95048e+07	2.52056	39.5048
2014-11-28	2.53657e+06	3.94836e+07	2.53657	39.4836
2014-11-29	2.55231e+06	3.94629e+07	2.55231	39.4629
2014-11-30	2.56776e+06	3.94427e+07	2.56776	39.4427
2014-12-01	2.58293e+06	3.9423e+07	2.58293	39.423
2014-12-02	2.5978e+06	3.9404e+07	2.5978	39.404
2014-12-03	2.61236e+06	3.93855e+07	2.61236	39.3855
2014-12-04	2.6266e+06	3.93675e+07	2.6266	39.3675
2014-12-05	2.64084e+06	3.93498e+07	2.64084	39.3498
2014-12-06	2.65536e+06	3.9332e+07	2.65536	39.332
2014-12-07	2.67015e+06	3.9314e+07	2.67015	39.314
2014-12-08	2.68522e+06	3.92959e+07	2.68522	39.2959
2014-12-09	2.70055e+06	3.92777e+07	2.70055	39.2777
2014-12-10	2.71614e+06	3.92593e+07	2.71614	39.2593
2014-12-11	2.73198e+06	3.92408e+07	2.73198	39.2408
2014-12-12	2.74807e+06	3.92222e+07	2.74807	39.2222
2014-12-13	2.76439e+06	3.92035e+07	2.76439	39.2035
2014-12-14	2.78094e+06	3.91847e+07	2.78094	39.1847
2014-12-15	2.79771e+06	3.91657e+07	2.79771	39.1657
2014-12-16	2.8147e+06	3.91467e+07	2.8147	39.1467
2014-12-17	2.8319e+06	3.91276e+07	2.8319	39.1276
2014-12-18	2.8493e+06	3.91084e+07	2.8493	39.1084
2014-12-19	2.86689e+06	3.90891e+07	2.86689	39.0891
2014-12-20	2.88468e+06	3.90698e+07	2.88468	39.0698
2014-12-21	2.90264e+06	3.90503e+07	2.90264	39.0503
2014-12-22	2.92078e+06	3.90308e+07	2.92078	39.0308
2014-12-23	2.93909e+06	3.90113e+07	2.93909	39.0113
2014-12-24	2.95756e+06	3.89917e+07	2.95756	38.9917
2014-12-25	2.97618e+06	3.8972e+07	2.97618	38.972
2014-12-26	2.99495e+06	3.89522e+07	2.99495	38.9522
2014-12-27	3.01386e+06	3.89325e+07	3.01386	38.9325
2014-12-28	3.0329e+06	3.89127e+07	3.0329	38.9127
2014-12-29	3.05207e+06	3.88928e+07	3.05207	38.8928
2014-12-30	3.07135e+06	3.88729e+07	3.07135	38.8729
2014-12-31	3.09075e+06	3.8853e+07	3.09075	38.853
2015-01-01	3.11026e+06	3.88331e+07	3.11026	38.8331
2015-01-02	3.12986e+06	3.88131e+07	3.12986	38.8131
2015-01-03	3.14955e+06	3.87932e+07	3.14955	38.7932
2015-01-04	3.16933e+06	3.87732e+07	3.16933	38.7732
2015-01-05	3.18919e+06	3.87532e+07	3.18919	38.7532
2015-01-06	3.20911e+06	3.87333e+07	3.20911	38.7333
2015-01-07	3.22911e+06	3.87133e+07	3.22911	38.7133
2015-01-08	3.24915e+06	3.86934e+07	3.24915	38.6934
2015-01-09	3.26925e+06	3.86734e+07	3.26925	38.6734
2015-01-10	3.28939e+06	3.86535e+07	3.28939	38.6535
2015-01-11	3.30957e+06	3.86336e+07	3.30957	38.6336
2015-01-12	3.32977e+06	3.86137e+07	3.32977	38.6137
2015-01-13	3.35e+06	3.85939e+07	3.35	38.5939
2015-01-14	3.37025e+06	3.85741e+07	3.37025	38.5741
2015-01-15	3.3905e+06	3.85544e+07	3.3905	38.5544
2015-01-16	3.41075e+06	3.85347e+07	3.41075	38.5347
2015-01-17	3.431e+06	3.8515e+07	3.431	38.515
2015-01-18	3.45124e+06	3.84954e+07	3.45124	38.4954
2015-01-19	3.47145e+06	3.84759e+07	3.47145	38.4759
2015-01-20	3.49165e+06	3.84564e+07	3.49165	38.4564
2015-01-21	3.5118e+06	3.8437e+07	3.5118	38.437
2015-01-22	3.53192e+06	3.84177e+07	3.53192	38.4177
2015-01-23	3.55199e+06	3.83984e+07	3.55199	38.3984
2015-01-24	3.57201e+06	3.83793e+07	3.57201	38.3793
2015-01-25	3.59197e+06	3.83602e+07	3.59197	38.3602
2015-01-26	3.61186e+06	3.83412e+07	3.61186	38.3412
2015-01-27	3.63167e+06	3.83224e+07	3.63167	38.3224
2015-01-28	3.6514e+06	3.83036e+07	3.6514	38.3036
2015-01-29	3.67105e+06	3.82849e+07	3.67105	38.2849
2015-01-30	3.6906e+06	3.82664e+07	3.6906	38.2664
2015-01-31	3.71019e+06	3.82468e+07	3.71019	38.2468
2015-02-01	3.72996e+06	3.8225e+07	3.72996	38.225
2015-02-02	3.74986e+06	3.82013e+07	3.74986	38.2013
2015-02-03	3.76988e+06	3.81759e+07	3.76988	38.1759
2015-02-04	3.78999e+06	3.8149e+07	3.78999	38.149
2015-02-05	3.81016e+06	3.81206e+07	3.81016	38.1206
2015-02-06	3.83036e+06	3.80911e+07	3.83036	38.0911
2015-02-07	3.85375e+06	3.80594e+07	3.85375	38.0594
2015-02-08	3.88305e+06	3.80246e+07	3.88305	38.0246
2015-02-09	3.91761e+06	3.7987e+07	3.91761	37.987
2015-02-10	3.95677e+06	3.7947e+07	3.95677	37.947
2015-02-11	3.99988e+06	3.79049e+07	3.99988	37.9049
2015-02-12	4.04628e+06	3.7861e+07	4.04628	37.861
2015-02-13	4.09532e+06	3.78157e+07	4.09532	37.8157
2015-02-14	4.14633e+06	3.77693e+07	4.14633	37.7693
2015-02-15	4.19866e+06	3.77222e+07	4.19866	37.7222
2015-02-16	4.25372e+06	3.76739e+07	4.25372	37.6739
2015-02-17	4.31282e+06	3.7624e+07	4.31282	37.624
2015-02-18	4.37515e+06	3.75726e+07	4.37515	37.5726
2015-02-19	4.43989e+06	3.75199e+07	4.43989	37.5199
2015-02-20	4.50624e+06	3.74661e+07	4.50624	37.4661
2015-02-21	4.57337e+06	3.74113e+07	4.57337	37.4113
2015-02-22	4.64049e+06	3.73557e+07	4.64049	37.3557
2015-02-23	4.70801e+06	3.72968e+07	4.70801	37.2968
2015-02-24	4.77692e+06	3.72324e+07	4.77692	37.2324
2015-02-25	4.84726e+06	3.71631e+07	4.84726	37.1631
2015-02-26	4.91905e+06	3.70895e+07	4.91905	37.0895
2015-02-27	4.99234e+06	3.70122e+07	4.99234	37.0122
2015-02-28	5.06714e+06	3.69317e+07	5.06714	36.9317
2015-03-01	5.1435e+06	3.68486e+07	5.1435	36.8486
2015-03-02	5.22145e+06	3.67636e+07	5.22145	36.7636
2015-03-03	5.30101e+06	3.66771e+07	5.30101	36.6771
2015-03-04	5.38223e+06	3.65899e+07	5.38223	36.5899
2015-03-05	5.46513e+06	3.65024e+07	5.46513	36.5024
2015-03-06	5.54975e+06	3.64153e+07	5.54975	36.4153
2015-03-07	5.63612e+06	3.63291e+07	5.63612	36.3291
2015-03-08	5.72428e+06	3.62445e+07	5.72428	36.2445
2015-03-09	5.81424e+06	3.6162e+07	5.81424	36.162
2015-03-10	5.90606e+06	3.60822e+07	5.90606	36.0822
2015-03-11	6.00218e+06	3.60049e+07	6.00218	36.0049
2015-03-12	6.1043e+06	3.59296e+07	6.1043	35.9296
2015-03-13	6.21132e+06	3.5856e+07	6.21132	35.856
2015-03-14	6.3221e+06	3.57839e+07	6.3221	35.7839
2015-03-15	6.43555e+06	3.57131e+07	6.43555	35.7131
2015-03-16	6.55055e+06	3.56435e+07	6.55055	35.6435
2015-03-17	6.66598e+06	3.55748e+07	6.66598	35.5748
2015-03-18	6.78073e+06	3.55067e+07	6.78073	35.5067
2015-03-19	6.89369e+06	3.54392e+07	6.89369	35.4392
2015-03-20	7.00475e+06	3.53712e+07	7.00475	35.3712
2015-03-21	7.11398e+06	3.53015e+07	7.11398	35.3015
2015-03-22	7.22052e+06	3.52302e+07	7.22052	35.2302
2015-03-23	7.32351e+06	3.5157e+07	7.32351	35.157
2015-03-24	7.4221e+06	3.50819e+07	7.4221	35.0819
2015-03-25	7.51543e+06	3.50046e+07	7.51543	35.0046
2015-03-26	7.60264e+06	3.49251e+07	7.60264	34.9251
2015-03-27	7.6867e+06	3.48435e+07	7.6867	34.8435
2015-03-28	7.77115e+06	3.47603e+07	7.77115	34.7603
2015-03-29	7.85607e+06	3.46755e+07	7.85607	34.6755
2015-03-30	7.94151e+06	3.45894e+07	7.94151	34.5894
2015-03-31	8.02752e+06	3.4502e+07	8.02752	34.502
2015-04-01	8.11417e+06	3.44134e+07	8.11417	34.4134
2015-04-02	8.20151e+06	3.43238e+07	8.20151	34.3238
2015-04-03	8.2896e+06	3.42332e+07	8.2896	34.2332
2015-04-04	8.37851e+06	3.41419e+07	8.37851	34.1419
2015-04-05	8.47132e+06	3.40463e+07	8.47132	34.0463
2015-04-06	8.57033e+06	3.39439e+07	8.57033	33.9439
2015-04-07	8.67435e+06	3.38358e+07	8.67435	33.8358
2015-04-08	8.78222e+06	3.37233e+07	8.78222	33.7233
2015-04-09	8.89277e+06	3.36075e+07	8.89277	33.6075
2015-04-10	9.00482e+06	3.34896e+07	9.00482	33.4896
2015-04-11	9.11719e+06	3.33708e+07	9.11719	33.3708
2015-04-12	9.22897e+06	3.32516e+07	9.22897	33.2516
2015-04-13	9.33928e+06	3.31326e+07	9.33928	33.1326
2015-04-14	9.44703e+06	3.30152e+07	9.44703	33.0152
2015-04-15	9.55114e+06	3.29005e+07	9.55114	32.9005
2015-04-16	9.65053e+06	3.27899e+07	9.65053	32.7899
2015-04-17	9.74412e+06	3.26847e+07	9.74412	32.6847
2015-04-18	9.83083e+06	3.25862e+07	9.83083	32.5862
2015-04-19	9.90956e+06	3.24956e+07	9.90956	32.4956
2015-04-20	9.97925e+06	3.24142e+07	9.97925	32.4142
2015-04-21	1.00427e+07	3.23394e+07	10.0427	32.3394
2015-04-22	1.01035e+07	3.22678e+07	10.1035	32.2678
2015-04-23	1.01621e+07	3.21992e+07	10.1621	32.1992
2015-04-24	1.02187e+07	3.21336e+07	10.2187	32.1336
2015-04-25	1.02736e+07	3.20709e+07	10.2736	32.0709
2015-04-26	1.0327e+07	3.2011e+07	10.327	32.011
2015-04-27	1.03793e+07	3.19538e+07	10.3793	31.9538
2015-04-28	1.04303e+07	3.18994e+07	10.4303	31.8994
2015-04-29	1.04799e+07	3.18476e+07	10.4799	31.8476
2015-04-30	1.05285e+07	3.1798e+07	10.5285	31.798
2015-05-01	1.05763e+07	3.175e+07	10.5763	31.75
2015-05-02	1.06238e+07	3.17032e+07	10.6238	31.7032
2015-05-03	1.06712e+07	3.16571e+07	10.6712	31.6571
2015-05-04	1.07189e+07	3.16113e+07	10.7189	31.6113
2015-05-05	1.07673e+07	3.15652e+07	10.7673	31.5652
2015-05-06	1.08166e+07	3.15184e+07	10.8166	31.5184
