# Supplementary material for: Dredging in the Spratly Islands: Gaining Land but Losing Reefs
Source: PLoS Biol. 2016 Mar 31;14(3):e1002422. doi: 10.1371/journal.pbio.1002422 (PMC4816285; doi:10.1371/journal.pbio.1002422)
Supplement: S3 Data — (XLSX) [file pbio.1002422.s003.xlsx]

## Sheet: Read me
S3 Data: Sizes of atolls in the Spratly Islands (data shown in Fig. 1D)
Tab	Column name	Column description
AtollAreas	Latitude	Approximate latitude (in decimal degrees) of atoll in the Spratly Islands
	Longitude	Approximate longitude (in decimal degrees) of atoll in the Spratly Islands
	Area (m^2)	Total area (in square meters ) for each atoll in the Spratly Islands
	Area (km^2)	Total area (in square kilometers ) for each atoll in the Spratly Islands
Histogram	Bin	Upper size limit (in square kilometers) for each category of the histogram. Lower limit is either 0 (in the case of the first row) or the number in the previous row.
	Frequency	Number of atolls that are within each size

## Sheet: AtollAreas
Latitude	Longitude	Area (m^2)	Area (km^2)
10.8348	116.871	281518	0.281518
9.65069	112.981	2.61017e+06	2.61017
8.71963	114.181	24051874	24.0519
10.4064	114.585	2770378	2.77038
10.3879	114.412	616173	0.616173
10.3774	114.364	2.42496e+06	2.42496
10.377	114.48	1407580	1.40758
11.2036	116.959	110068	0.110068
11.1763	116.433	788487	0.788487
11.0919	114.372	3.36181e+06	3.36181
11.0742	114.256	1.12169e+06	1.12169
11.0541	114.285	3.53986e+06	3.53986
10.8093	116.092	1.54184e+06	1.54184
10.7697	114.59	1.44504e+06	1.44504
10.7112	114.333	9570220	9.57022
10.7181	116.166	624157	0.624157
10.7131	114.534	2828289	2.82829
10.6747	114.46	1.51656e+06	1.51656
10.6194	116.17	3.77588e+06	3.77588
10.2325	113.638	2.79616e+06	2.79616
10.2075	114.223	3.81623e+06	3.81623
10.179	114.357	6.253e+06	6.253
10.1617	114.252	1.79281e+06	1.79281
10.0579	113.855	22372180	22.3722
9.97764	114.589	1.64102e+06	1.64102
9.96436	114.562	4823315	4.82332
9.93369	114.523	3.68874e+06	3.68874
9.90743	114.597	1.79032e+06	1.79032
9.90198	114.56	904356	0.904356
9.8965	114.394	1591165	1.59116
9.88658	114.329	2593985	2.59398
9.88049	114.306	1.4266e+06	1.4266
9.86859	114.511	1.08825e+06	1.08825
9.85342	114.279	2.22976e+06	2.22976
9.20588	113.662	1.15404e+06	1.15404
8.95618	113.677	16033483	16.0335
8.93191	112.353	1914543	1.91454
8.85845	114.655	15459777	15.4598
8.85878	112.841	9947863	9.94786
8.82429	112.604	30299786	30.2998
8.17311	113.303	57762048	57.762
8.1481	114.624	1.91784e+06	1.91784
8.12534	114.554	15675589	15.6756
8.13269	114.793	4.00747e+06	4.00747
8.10752	114.132	6.03676e+06	6.03676
7.97333	113.917	22201864	22.2019
7.62418	113.793	16156741	16.1567
7.62265	113.935	14916261	14.9163
9.176	116.46	1666668	1.66667
9.04419	116.662	3.19537e+06	3.19537
8.90417	116.273	5.54563e+06	5.54563
9.32826	115.929	4.32734e+06	4.32734
9.79809	116.442	13886116	13.8861
9.76345	116.507	1.91393e+06	1.91393
9.73414	116.564	23206532	23.2065
9.71828	116.48	3549234	3.54923
9.75474	116.444	1.4771e+06	1.4771
9.74047	115.86	27837260	27.8373
10.8176	115.824	885383	0.885383
10.7332	115.803	686619	0.686619
9.60105	116.166	1.7345e+06	1.7345
11.0863	115.027	2.629e+06	2.629
10.851	114.876	433122	0.433122
10.8751	114.919	6562289	6.56229
11.1504	114.794	4.6862e+06	4.6862
10.1229	116.144	628473	0.628473
10.1946	115.298	8.01649e+06	8.01649
10.1907	115.297	4286286	4.28629
10.251	115.367	2.26428e+06	2.26428
10.4993	115.706	3.3745e+06	3.3745
10.5343	115.731	2.97896e+06	2.97896
10.4635	115.726	335308	0.335308
10.5363	115.79	1.95092e+06	1.95092
10.4622	115.778	2.5984e+06	2.5984
9.3814	115.446	6930240	6.93024
10.3377	114.701	14431890	14.4319
9.99053	114.649	11457788	11.4578
9.91351	114.497	3.10371e+06	3.10371
9.90373	114.466	3.27987e+06	3.27987
9.77853	114.37	1.22213e+06	1.22213
9.79736	114.4	2.00703e+06	2.00703
9.83215	114.46	3.17633e+06	3.17633
9.85148	114.492	685717	0.685717
9.90708	115.535	17009294	17.0093
8.36554	115.224	21291626	21.2916
8.17652	114.709	4496985	4.49698
7.37493	113.821	7194816	7.19482
9.7194	114.282	9500940	9.50094
9.77003	114.257	2.76409e+06	2.76409
9.55019	112.891	6302516	6.30252
9.66342	113.019	1.0106e+06	1.0106
9.65531	113.05	620241	0.620241
9.59683	112.925	1.11229e+06	1.11229
7.95902	111.72	6.30903e+06	6.30903
8.8721	112.223	19974548	19.9745
8.83642	112.224	706657	0.706657
8.81212	114.014	18959002	18.959
8.81611	113.935	15178752	15.1788
7.89553	112.925	1.0994e+06	1.0994
6.33172	113.241	1.90968e+06	1.90968
6.94437	113.58	2.49387e+06	2.49387
5.52491	112.542	1.06452e+06	1.06452
5.02127	112.641	2077037	2.07704
5.36964	112.625	1.08871e+06	1.08871
11.0468	114.199	11498609	11.4986
11.4301	114.331	843374	0.843374
11.3846	114.302	3.08355e+06	3.08355
11.4543	114.356	1969384	1.96938
11.4622	114.393	2.86039e+06	2.86039
10.9242	114.082	8965175	8.96518

## Sheet: Histogram
Bin	Frequency
2	42
4	28
6	7
8	7
10	5
12	2
14	1
16	5
18	3
20	2
22	1
24	3
26	1
28	1
35	1
60	1
